# Supplementary material for: Synthesis of 3-spirooxindole 3H-indoles through Rh(iii)-catalyzed [4 + 1] redox-neutral spirocyclization of N-aryl amidines with diazo oxindoles
Source: Royal Society of Chemistry journal article supplement (doi:10.1039/d1qo00551k), 2021-01-01
Supplement: d1qo00551k1.pdf [file d1qo00551k1.pdf]

## Supporting Information

### Synthesis of 3-Spirooxindole 3*H*-Indoles through Rh(III)-Catalyzed [4 + 1] Redox-Neutral

#### Spirocyclization of *N*-Aryl Amidines with Diazo Oxindoles

Qianting Zhou, Xia Song, Xinying Zhang\*, and Xuesen Fan\*

*NMPA Key Laboratory for Research and Evaluation of Innovative Drug, Collaborative Innovation Center of Henan Province for Green Manufacturing of Fine Chemicals, Key Laboratory of Green Chemical Media and Reactions, Ministry of Education, School of Chemistry and Chemical Engineering, Henan Normal University,*

*Xinxiang, Henan 453007, China*

*E-mail: xinyingzhang@htu.cn; xuesen.fan@htu.cn*

## Table of Contents

|      |                                                |         |
|------|------------------------------------------------|---------|
| I    | General experimental information               | S3      |
| II   | Experimental procedures and spectroscopic data | S4-S24  |
| III  | Mechanism studies                              | S25-S28 |
| IV   | Copies of NMR spectra of <b>3a-3jj</b>         | S29-S68 |
| V    | Copies of NMR spectra of <b>4, 5, 6, 7, 8</b>  | S69-S73 |
| VI   | X-ray crystal structure and data of <b>3a</b>  | S74-S75 |
| VII  | X-ray crystal structure and data of <b>3k</b>  | S76-S77 |
| VIII | X-ray crystal structure and data of <b>6</b>   | S78-S79 |
| IX   | References                                     | S80     |

## I. General experimental information

Commercial reagents were used without further purification. Amidines (**1**),<sup>[1]</sup> diazooxindoles (**2**),<sup>[2]</sup> and  $[\text{RhCp}^*\text{Cl}_2]_2$ <sup>[3]</sup> were prepared based on literature procedures. Melting points were recorded with a micro melting point apparatus and uncorrected. The  $^1\text{H}$  NMR spectra were recorded at 400 MHz or 600 MHz. The  $^{13}\text{C}$  NMR spectra were recorded at 100 MHz or 150 MHz. The  $^{19}\text{F}$  NMR spectra were recorded at 376 MHz or 565 MHz. Chemical shifts were expressed in parts per million ( $\delta$ ), and were reported as s (singlet), d (doublet), t (triplet), dd (doublet of doublet), m (multiplet), br s (broad singlet), etc. The coupling constants  $J$  were given in Hz. High resolution mass spectra (HRMS) were obtained *via* ESI mode by using a MicrOTOF mass spectrometer. All reactions were monitored by thin layer chromatography (TLC) using silica gel plates (silica gel 60 F254 0.25 mm), and components were visualized by observation under UV light (254 and 365 nm).

## II. Experimental procedures and spectroscopic data

### 1. Typical procedures for the synthesis of **3a** and spectroscopic data of **3a-3jj**

To a reaction tube equipped with a stir bar were charged with *N*-phenylpivalimidamide (**1a**, 35.2 mg, 0.2 mmol), DCE (2.0 mL), [RhCp\*Cl<sub>2</sub>]<sub>2</sub> (2.5 mg, 0.004 mmol), 1-AdCO<sub>2</sub>H (72.1 mg, 0.4 mmol), CsOAc (1.9 mg, 0.01 mmol) and 3-diazo-1-methylindolin-2-one (**2a**, 52.0 mg, 0.3 mmol). The tube was sealed, and the mixture was stirred at 60 °C (oil bath) under air for 4 h. Upon completion, it was cooled to room temperature, quenched with saturated aqueous solution of NaHCO<sub>3</sub>, and then extracted with dichloromethane (10 mL × 3). The combined organic layers were washed with water, dried over anhydrous Na<sub>2</sub>SO<sub>4</sub>, filtered and evaporated under reduced pressure. The residue was purified by silica gel chromatography using petroleum ether/ethyl acetate (10:1) as eluent to afford **3a** (44 mg, 72%). **3b-3jj** were obtained in a similar manner.

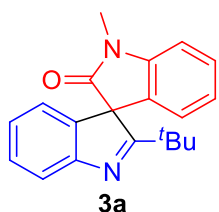

#### 2-(*tert*-Butyl)-1'-methylspiro[indole-3,3'-indolin]-2'-one (**3a**)

Eluent: petroleum ether/ethyl acetate (10:1). White solid (44 mg, 72%), mp 134-135 °C. <sup>1</sup>H NMR (CDCl<sub>3</sub>, 400 MHz): δ 7.66 (d, *J* = 8.0 Hz, 1H), 7.39-7.32 (m, 2H), 7.08 (t, *J* = 7.6 Hz, 1H), 7.01-6.97 (m, 2H), 6.80 (d, *J* = 7.6 Hz, 1H), 6.77-6.75 (m, 1H), 3.35 (s, 3H), 1.17 (s, 9H). <sup>13</sup>C{<sup>1</sup>H} NMR (CDCl<sub>3</sub>, 100 MHz): δ 187.0, 172.3, 156.2, 144.7, 139.8, 129.2, 128.9, 127.0, 126.2, 124.1, 123.2, 121.3, 120.6, 108.9, 70.1, 38.5, 29.4, 27.1. HRMS (ESI) *m/z*: [M+Na]<sup>+</sup> Calcd for C<sub>20</sub>H<sub>20</sub>N<sub>2</sub>NaO 327.1468; Found 327.1456.

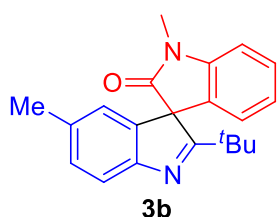

#### 2-(*tert*-Butyl)-1',5-dimethylspiro[indole-3,3'-indolin]-2'-one (**3b**)



Eluent: petroleum ether/ethyl acetate (10:1). White solid (45 mg, 71%), mp 139-140 °C.  $^1\text{H}$  NMR ( $\text{CDCl}_3$ , 400 MHz):  $\delta$  7.53 (d,  $J = 8.0$  Hz, 1H), 7.37 (td,  $J_1 = 8.0$  Hz,  $J_2 = 1.2$  Hz, 1H), 7.13 (d,  $J = 7.6$  Hz, 1H), 7.02-6.98 (m, 2H), 6.78-6.76 (m, 1H), 6.60 (s, 1H), 3.35 (s, 3H), 2.24 (s, 3H), 1.16 (s, 9H).  $^{13}\text{C}\{^1\text{H}\}$  NMR ( $\text{CDCl}_3$ , 100 MHz):  $\delta$  185.9, 172.6, 153.9, 144.7, 139.9, 136.1, 129.5, 129.1, 127.3, 124.2, 123.1, 121.9, 120.2, 108.9, 69.9, 38.4, 29.4, 27.1, 21.3. HRMS (ESI)  $m/z$ :  $[\text{M}+\text{H}]^+$  Calcd for  $\text{C}_{21}\text{H}_{23}\text{N}_2\text{O}$  319.1805; Found 319.1798.

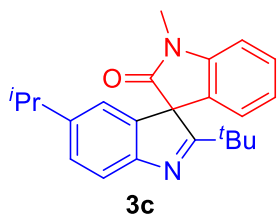

### 2-(*tert*-Butyl)-5-isopropyl-1'-methylspiro[indole-3,3'-indolin]-2'-one (3c)

Eluent: petroleum ether/ethyl acetate (10:1). White solid (51 mg, 74%), mp 161-162 °C.  $^1\text{H}$  NMR ( $\text{CDCl}_3$ , 400 MHz):  $\delta$  7.57 (d,  $J = 8.0$  Hz, 1H), 7.37 (td,  $J_1 = 7.6$  Hz,  $J_2 = 1.2$  Hz, 1H), 7.21 (dd,  $J_1 = 8.0$  Hz,  $J_2 = 1.6$  Hz, 1H), 7.01-6.98 (m, 2H), 6.78-6.76 (m, 1H), 6.62 (d,  $J = 1.2$  Hz, 1H), 3.36 (s, 3H), 2.82-2.75 (m, 1H), 1.15-1.12 (m, 15H).  $^{13}\text{C}\{^1\text{H}\}$  NMR ( $\text{CDCl}_3$ , 100 MHz):  $\delta$  186.1, 172.6, 154.3, 147.3, 144.7, 139.8, 129.1, 127.3, 126.8, 124.2, 123.1, 120.3, 119.6, 108.9, 70.0, 38.4, 34.1, 29.4, 27.1, 24.2, 24.1. HRMS (ESI)  $m/z$ :  $[\text{M}+\text{H}]^+$  Calcd for  $\text{C}_{23}\text{H}_{27}\text{N}_2\text{O}$  347.2118; Found 347.2105.

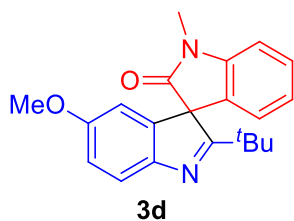

### 2-(*tert*-Butyl)-5-methoxy-1'-methylspiro[indole-3,3'-indolin]-2'-one (3d)

Eluent: petroleum ether/ethyl acetate (10:1). White solid (38 mg, 57%), mp 184-185 °C.  $^1\text{H}$  NMR ( $\text{CDCl}_3$ , 600 MHz):  $\delta$  7.56 (d,  $J = 8.4$  Hz, 1H), 7.37 (td,  $J_1 = 7.8$  Hz,  $J_2 = 1.2$  Hz, 1H), 7.00 (t,  $J = 7.8$  Hz, 2H), 6.86 (dd,  $J_1 = 8.4$  Hz,  $J_2 = 2.4$  Hz, 1H), 6.78 (d,  $J = 7.2$  Hz, 1H), 6.34 (d,  $J = 2.4$  Hz, 1H), 3.69 (s, 3H), 3.34 (s, 3H), 1.15 (s, 9H).  $^{13}\text{C}\{^1\text{H}\}$  NMR ( $\text{CDCl}_3$ , 150 MHz):  $\delta$  184.8, 172.4, 158.5, 149.7, 144.6, 141.3, 129.2, 127.2, 124.2,

123.2, 121.0, 113.7, 108.9, 107.9, 70.2, 55.7, 38.3, 29.4, 27.1. HRMS (ESI)  $m/z$ :  $[M+H]^+$  Calcd for  $C_{21}H_{23}N_2O_2$  335.1754; Found 335.1741.

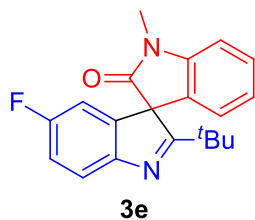

### 2-(*tert*-Butyl)-5-fluoro-1'-methylspiro[indole-3,3'-indolin]-2'-one (3e)

Eluent: petroleum ether/ethyl acetate (10:1). White solid (45 mg, 70%), mp 148-149 °C.  $^1H$  NMR ( $CDCl_3$ , 400 MHz):  $\delta$  7.59 (dd,  $J_1 = 8.4$  Hz,  $J_2 = 4.4$  Hz, 1H), 7.41-7.37 (m, 1H), 7.05-6.99 (m, 3H), 6.77 (d,  $J = 7.2$  Hz, 1H), 6.52 (dd,  $J_1 = 8.0$  Hz,  $J_2 = 2.8$  Hz, 1H), 3.35 (s, 3H), 1.15 (s, 9H).  $^{13}C\{^1H\}$  NMR ( $CDCl_3$ , 150 MHz):  $\delta$  186.9 (d,  $^5J_{C-F} = 3.3$  Hz), 171.7, 161.4 (d,  $^1J_{C-F} = 243.9$  Hz), 152.3 (d,  $^4J_{C-F} = 2.3$  Hz), 144.6, 141.4 (d,  $^3J_{C-F} = 8.7$  Hz), 129.5, 126.4, 124.2, 123.4, 121.4 (d,  $^3J_{C-F} = 8.7$  Hz), 115.6 (d,  $^2J_{C-F} = 23.0$  Hz), 109.3 (d,  $^2J_{C-F} = 25.2$  Hz), 109.1, 70.3 (d,  $^4J_{C-F} = 2.1$  Hz), 38.5, 29.3, 27.1.  $^{19}F$  NMR ( $CDCl_3$ , 376 MHz):  $\delta$  -115.7 (td,  $J_1 = 8.3$  Hz,  $J_2 = 4.1$  Hz). HRMS (ESI)  $m/z$ :  $[M+Na]^+$  Calcd for  $C_{20}H_{19}FN_2NaO$  345.1374; Found 345.1359.

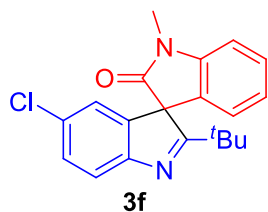

### 2-(*tert*-Butyl)-5-chloro-1'-methylspiro[indole-3,3'-indolin]-2'-one (3f)

Eluent: petroleum ether/ethyl acetate (10:1). White solid (52 mg, 77%), mp 159-160 °C.  $^1H$  NMR ( $CDCl_3$ , 400 MHz):  $\delta$  7.57 (d,  $J = 8.0$  Hz, 1H), 7.39 (td,  $J_1 = 8.0$  Hz,  $J_2 = 1.2$  Hz, 1H), 7.31 (dd,  $J_1 = 8.4$  Hz,  $J_2 = 2.0$  Hz, 1H), 7.04-6.99 (m, 2H), 6.77-6.76 (m, 2H), 3.35 (s, 3H), 1.15 (s, 9H).  $^{13}C\{^1H\}$  NMR ( $CDCl_3$ , 100 MHz):  $\delta$  187.6, 171.5, 154.8, 144.6, 141.3, 131.7, 129.5, 129.1, 126.2, 124.2, 123.4, 121.9, 121.5, 109.1, 70.2, 38.5, 29.3, 27.2. HRMS (ESI)  $m/z$ :  $[M+Na]^+$  Calcd for  $C_{20}H_{19}ClN_2NaO$  361.1078; Found 361.1067.

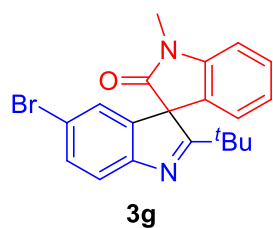

**5-Bromo-2-(*tert*-butyl)-1'-methylspiro[indole-3,3'-indolin]-2'-one (3g)**

Eluent: petroleum ether/ethyl acetate (10:1). White solid (58 mg, 76%), mp 182-183 °C. <sup>1</sup>H NMR (CDCl<sub>3</sub>, 400 MHz): δ 7.52 (d, *J* = 8.4 Hz, 1H), 7.46 (dd, *J*<sub>1</sub> = 8.4 Hz, *J*<sub>2</sub> = 2.0 Hz, 1H), 7.39 (td, *J*<sub>1</sub> = 8.0 Hz, *J*<sub>2</sub> = 1.2 Hz, 1H), 7.04-6.99 (m, 2H), 6.91 (d, *J* = 1.6 Hz, 1H), 6.76 (d, *J* = 7.2 Hz, 1H), 3.35 (s, 3H), 1.15 (s, 9H). <sup>13</sup>C{<sup>1</sup>H} NMR (CDCl<sub>3</sub>, 100 MHz): δ 187.7, 171.5, 155.2, 144.6, 141.7, 132.0, 129.6, 126.1, 124.7, 124.2, 123.4, 122.0, 119.5, 109.2, 70.2, 38.5, 29.3, 27.2. HRMS (ESI) *m/z*: [M+H]<sup>+</sup> Calcd for C<sub>20</sub>H<sub>20</sub>BrN<sub>2</sub>O 383.0754; Found 383.0739.

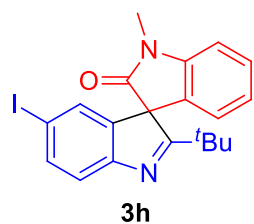

**2-(*tert*-Butyl)-5-iodo-1'-methylspiro[indole-3,3'-indolin]-2'-one (3h)**

Eluent: petroleum ether/ethyl acetate (10:1). White solid (58 mg, 67%), mp 207-208 °C. <sup>1</sup>H NMR (CDCl<sub>3</sub>, 400 MHz): δ 7.67 (dd, *J*<sub>1</sub> = 8.0 Hz, *J*<sub>2</sub> = 1.2 Hz, 1H), 7.42-7.37 (m, 2H), 7.09 (s, 1H), 7.04-6.99 (m, 2H), 6.76 (d, *J* = 7.2 Hz, 1H), 3.35 (s, 3H), 1.15 (s, 9H). <sup>13</sup>C{<sup>1</sup>H} NMR (CDCl<sub>3</sub>, 150 MHz): δ 187.6, 171.5, 155.9, 144.6, 141.9, 138.0, 130.4, 129.5, 126.1, 124.2, 123.4, 122.5, 109.1, 90.5, 70.0, 38.5, 29.3, 27.2. HRMS (ESI) *m/z*: [M+H]<sup>+</sup> Calcd for C<sub>20</sub>H<sub>20</sub>IN<sub>2</sub>O 431.0615; Found 431.0614.

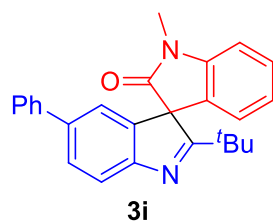

**2-(*tert*-Butyl)-1'-methyl-5-phenylspiro[indole-3,3'-indolin]-2'-one (3i)**

Eluent: petroleum ether/ethyl acetate (10:1). White solid (26 mg, 34%), mp 189-190 °C.  $^1\text{H}$  NMR ( $\text{CDCl}_3$ , 400 MHz):  $\delta$  7.72 (d,  $J = 8.4$  Hz, 1H), 7.57 (dd,  $J_1 = 8.4$  Hz,  $J_2 = 1.6$  Hz, 1H), 7.44 (d,  $J = 7.2$  Hz, 2H), 7.40-7.33 (m, 3H), 7.28 (d,  $J = 7.6$  Hz, 1H), 7.02-6.97 (m, 3H), 6.81 (d,  $J = 7.2$  Hz, 1H), 3.37 (s, 3H), 1.19 (s, 9H).  $^{13}\text{C}\{^1\text{H}\}$  NMR ( $\text{CDCl}_3$ , 100 MHz):  $\delta$  187.3, 172.2, 155.6, 144.7, 140.9, 140.5, 139.6, 129.3, 128.7, 128.1, 127.2, 127.0, 124.2, 123.3, 120.8, 120.3, 109.0, 70.2, 38.6, 29.4, 27.1. HRMS (ESI)  $m/z$ :  $[\text{M}+\text{H}]^+$  Calcd for  $\text{C}_{26}\text{H}_{25}\text{N}_2\text{O}$  381.1961; Found 381.1958.

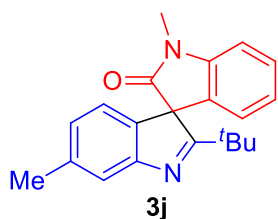

### 2-(*tert*-Butyl)-1',6-dimethylspiro[indole-3,3'-indolin]-2'-one (3j)

Eluent: petroleum ether/ethyl acetate (10:1). White solid (48 mg, 75%), mp 179-180 °C.  $^1\text{H}$  NMR ( $\text{CDCl}_3$ , 600 MHz):  $\delta$  7.48 (s, 1H), 7.35 (td,  $J_1 = 7.8$  Hz,  $J_2 = 1.2$  Hz, 1H), 6.99-6.97 (m, 2H), 6.90 (dd,  $J_1 = 7.8$  Hz,  $J_2 = 0.6$  Hz, 1H), 6.76 (dd,  $J_1 = 7.8$  Hz,  $J_2 = 0.6$  Hz, 1H), 6.68 (d,  $J = 7.8$  Hz, 1H), 3.33 (s, 3H), 2.38 (s, 3H), 1.16 (s, 9H).  $^{13}\text{C}\{^1\text{H}\}$  NMR ( $\text{CDCl}_3$ , 150 MHz):  $\delta$  187.2, 172.5, 156.4, 144.7, 139.0, 136.9, 129.1, 127.2, 126.8, 124.1, 123.1, 121.4, 120.9, 108.9, 69.8, 38.5, 29.4, 27.0, 21.6. HRMS (ESI)  $m/z$ :  $[\text{M}+\text{H}]^+$  Calcd for  $\text{C}_{21}\text{H}_{23}\text{N}_2\text{O}$  319.1805; Found 319.1801.

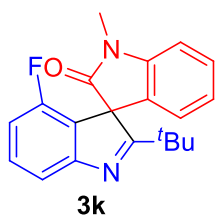

### 2-(*tert*-Butyl)-4-fluoro-1'-methylspiro[indole-3,3'-indolin]-2'-one (3k)

Eluent: petroleum ether/ethyl acetate (10:1). White solid (47 mg, 73%), mp 105-106 °C.  $^1\text{H}$  NMR ( $\text{CDCl}_3$ , 600 MHz):  $\delta$  7.46 (d,  $J = 7.8$  Hz, 1H), 7.38 (td,  $J_1 = 7.8$  Hz,  $J_2 = 1.2$  Hz, 1H), 7.34-7.31 (m, 1H), 7.01-6.98 (m, 2H), 6.79-6.76 (m, 2H), 3.37 (s, 3H), 1.16 (s, 9H).  $^{13}\text{C}\{^1\text{H}\}$  NMR ( $\text{CDCl}_3$ , 100 MHz):  $\delta$  187.9, 170.9, 158.7 (d,

$^3J_{\text{C-F}} = 4.3$  Hz), 156.9 (d,  $^1J_{\text{C-F}} = 250.7$  Hz), 144.8, 130.7 (d,  $^3J_{\text{C-F}} = 7.9$  Hz), 129.5, 125.3 (d,  $^2J_{\text{C-F}} = 14.4$  Hz), 124.6, 123.7, 123.1, 116.6 (d,  $^4J_{\text{C-F}} = 3.6$  Hz), 113.5 (d,  $^2J_{\text{C-F}} = 19.5$  Hz), 109.0, 68.7 (d,  $^3J_{\text{C-F}} = 3.6$  Hz), 38.7, 29.4, 27.1.  $^{19}\text{F}$  NMR ( $\text{CDCl}_3$ , 376 MHz):  $\delta$  -120.1 (dd,  $J_1 = 8.3$  Hz,  $J_2 = 5.6$  Hz). HRMS (ESI)  $m/z$ :  $[\text{M}+\text{Na}]^+$  Calcd for  $\text{C}_{20}\text{H}_{19}\text{FN}_2\text{NaO}$  345.1374; Found 345.1368.

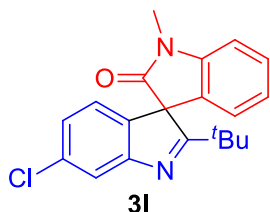

### 2-(*tert*-Butyl)-6-chloro-1'-methylspiro[indole-3,3'-indolin]-2'-one (**3l**)

Eluent: petroleum ether/ethyl acetate (10:1). White solid (53 mg, 78%), mp 177-178 °C.  $^1\text{H}$  NMR ( $\text{CDCl}_3$ , 400 MHz):  $\delta$  7.64 (d,  $J = 1.6$  Hz, 1H), 7.38 (td,  $J_1 = 8.0$  Hz,  $J_2 = 1.2$  Hz, 1H), 7.06 (dd,  $J_1 = 8.0$  Hz,  $J_2 = 1.6$  Hz, 1H), 7.02-6.98 (m, 2H), 6.75-6.71 (m, 2H), 3.33 (s, 3H), 1.15 (s, 9H).  $^{13}\text{C}\{^1\text{H}\}$  NMR ( $\text{CDCl}_3$ , 100 MHz):  $\delta$  189.1, 171.6, 157.4, 144.7, 138.2, 134.6, 129.5, 126.3, 126.1, 124.1, 123.4, 122.1, 121.2, 109.1, 69.8, 38.7, 29.3, 27.1. HRMS (ESI)  $m/z$ :  $[\text{M}+\text{Na}]^+$  Calcd for  $\text{C}_{20}\text{H}_{19}\text{ClN}_2\text{NaO}$  361.1078; Found 361.1070.

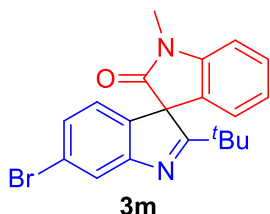

### 6-Bromo-2-(*tert*-butyl)-1'-methylspiro[indole-3,3'-indolin]-2'-one (**3m**)

Eluent: petroleum ether/ethyl acetate (10:1). White solid (53 mg, 69%), mp 168-169 °C.  $^1\text{H}$  NMR ( $\text{CDCl}_3$ , 600 MHz):  $\delta$  7.81 (d,  $J = 1.2$  Hz, 1H), 7.38 (td,  $J_1 = 7.8$  Hz,  $J_2 = 1.2$  Hz, 1H), 7.22 (dd,  $J_1 = 7.8$  Hz,  $J_2 = 1.8$  Hz, 1H), 7.02-6.99 (m, 2H), 6.75 (d,  $J = 6.6$  Hz, 1H), 6.67 (d,  $J = 7.8$  Hz, 1H), 3.34 (s, 3H), 1.15 (s, 9H).  $^{13}\text{C}\{^1\text{H}\}$  NMR ( $\text{CDCl}_3$ , 100 MHz):  $\delta$  189.0, 171.5, 157.6, 144.7, 138.7, 129.5, 129.0, 126.2, 124.15, 124.12, 123.4, 122.5, 122.4, 109.1, 69.9, 38.6, 29.3, 27.1. HRMS (ESI)  $m/z$ :  $[\text{M}+\text{Na}]^+$  Calcd for  $\text{C}_{20}\text{H}_{19}\text{BrN}_2\text{NaO}$  405.0573; Found 405.0563.

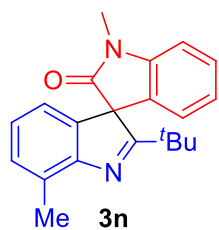

**2-(*tert*-Butyl)-1',7-dimethylspiro[indole-3,3'-indolin]-2'-one (3n)**

Eluent: petroleum ether/ethyl acetate (30:1). White solid (35 mg, 55%), mp 135-136 °C.  $^1\text{H}$  NMR ( $\text{CDCl}_3$ , 600 MHz):  $\delta$  7.35 (td,  $J_1 = 7.8$  Hz,  $J_2 = 1.2$  Hz, 1H), 7.13 (d,  $J = 7.8$  Hz, 1H), 6.99-6.95 (m, 3H), 6.76 (dd,  $J_1 = 7.8$  Hz,  $J_2 = 1.2$  Hz, 1H), 6.60 (d,  $J = 7.2$  Hz, 1H), 3.34 (s, 3H), 2.63 (s, 3H), 1.16 (s, 9H).  $^{13}\text{C}\{^1\text{H}\}$  NMR ( $\text{CDCl}_3$ , 100 MHz):  $\delta$  185.0, 172.7, 155.0, 144.7, 139.7, 130.6, 130.3, 129.0, 127.4, 125.9, 124.1, 123.1, 118.6, 108.8, 70.3, 38.5, 29.5, 27.0, 17.1. HRMS (ESI)  $m/z$ :  $[\text{M}+\text{H}]^+$  Calcd for  $\text{C}_{21}\text{H}_{23}\text{N}_2\text{O}$  319.1805; Found 319.1801.

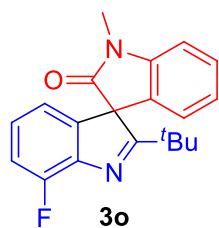

**2-(*tert*-Butyl)-7-fluoro-1'-methylspiro[indole-3,3'-indolin]-2'-one (3o)**

Eluent: petroleum ether/ethyl acetate (10:1). White solid (27 mg, 42%), mp 129-130 °C.  $^1\text{H}$  NMR ( $\text{CDCl}_3$ , 400 MHz):  $\delta$  7.39 (td,  $J_1 = 8.0$  Hz,  $J_2 = 1.2$  Hz, 1H), 7.08-6.99 (m, 4H), 6.78-6.76 (m, 1H), 6.60-6.58 (m, 1H), 3.35 (s, 3H), 1.18 (s, 9H).  $^{13}\text{C}\{^1\text{H}\}$  NMR ( $\text{CDCl}_3$ , 150 MHz):  $\delta$  187.6, 171.6, 153.6 (d,  $^1J_{\text{C-F}} = 253.8$  Hz), 144.7, 143.1 (d,  $^2J_{\text{C-F}} = 11.0$  Hz), 142.9 (d,  $^3J_{\text{C-F}} = 3.3$  Hz), 129.5, 127.6 (d,  $^3J_{\text{C-F}} = 6.5$  Hz), 126.4, 124.1, 123.4, 117.1 (d,  $^4J_{\text{C-F}} = 3.3$  Hz), 116.3 (d,  $^2J_{\text{C-F}} = 18.6$  Hz), 109.1, 70.5, 38.7, 29.3, 27.1.  $^{19}\text{F}$  NMR ( $\text{CDCl}_3$ , 376 MHz):  $\delta$  -125.19 – -125.23 (m). HRMS (ESI)  $m/z$ :  $[\text{M}+\text{Na}]^+$  Calcd for  $\text{C}_{20}\text{H}_{19}\text{FN}_2\text{NaO}$  345.1374; Found 345.1366.

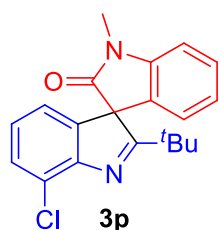

**2-(*tert*-Butyl)-7-chloro-1'-methylspiro[indole-3,3'-indolin]-2'-one (3p)**

Eluent: petroleum ether/ethyl acetate (10:1). White solid (35 mg, 52%), mp 160-161 °C.  $^1\text{H}$  NMR ( $\text{CDCl}_3$ , 600 MHz):  $\delta$  7.38 (td,  $J_1 = 8.4$  Hz,  $J_2 = 1.2$  Hz, 1H), 7.31 (d,  $J = 7.8$  Hz, 1H), 7.02-6.99 (m, 3H), 6.77-6.76 (m, 1H), 6.68 (dd,  $J_1 = 7.2$  Hz,  $J_2 = 0.6$  Hz, 1H), 3.34 (s, 3H), 1.18 (s, 9H).  $^{13}\text{C}\{^1\text{H}\}$  NMR ( $\text{CDCl}_3$ , 100 MHz):  $\delta$  188.1, 171.6, 153.2, 144.6, 141.6, 129.54, 129.50, 127.2, 126.3, 125.6, 124.2, 123.4, 119.7, 109.1, 71.1, 38.8, 29.4, 27.2. HRMS (ESI)  $m/z$ :  $[\text{M}+\text{Na}]^+$  Calcd for  $\text{C}_{20}\text{H}_{19}\text{ClN}_2\text{NaO}$  361.1078; Found 361.1062.

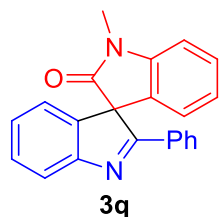

### 1'-Methyl-2-phenylspiro[indole-3,3'-indolin]-2'-one (3q)

Eluent: petroleum ether/ethyl acetate (30:1). White solid (37 mg, 57%), mp 176-177 °C.  $^1\text{H}$  NMR ( $\text{CDCl}_3$ , 400 MHz):  $\delta$  7.78 (d,  $J = 8.0$  Hz, 1H), 7.60-7.58 (m, 2H), 7.43-7.33 (m, 3H), 7.28-7.24 (m, 2H), 7.17-7.13 (m, 1H), 7.08 (d,  $J = 8.0$  Hz, 1H), 6.98-6.93 (m, 2H), 6.74 (d,  $J = 7.2$  Hz, 1H), 3.40 (s, 3H).  $^{13}\text{C}\{^1\text{H}\}$  NMR ( $\text{CDCl}_3$ , 100 MHz):  $\delta$  174.2, 172.4, 156.4, 144.4, 140.1, 132.2, 131.2, 129.4, 129.3, 128.8, 128.0, 127.8, 126.7, 123.9, 123.8, 121.7, 121.4, 109.2, 69.0, 27.3. HRMS (ESI)  $m/z$ :  $[\text{M}+\text{H}]^+$  Calcd for  $\text{C}_{22}\text{H}_{17}\text{N}_2\text{O}$  325.1335; Found 325.1337.

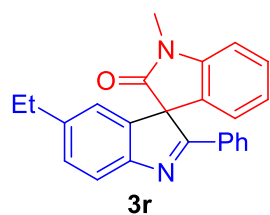

### 5-Ethyl-1'-methyl-2-phenylspiro[indole-3,3'-indolin]-2'-one (3r)

Eluent: petroleum ether/ethyl acetate (30:1). White solid (26 mg, 37%), mp 172-173 °C.  $^1\text{H}$  NMR ( $\text{CDCl}_3$ , 400 MHz):  $\delta$  7.61 (d,  $J = 7.6$  Hz, 1H), 7.51-7.48 (m, 2H), 7.32 (td,  $J_1 = 8.0$  Hz,  $J_2 = 1.2$  Hz, 1H), 7.26 (t,  $J = 7.6$  Hz, 1H), 7.20-7.16 (m, 3H), 7.02 (d,  $J = 8.0$  Hz, 1H), 6.90 (t,  $J = 7.6$  Hz, 1H), 6.70-6.68 (m, 2H), 3.35 (s, 3H), 2.51 (q,  $J = 7.6$  Hz, 2H), 1.09 (t,  $J = 7.6$  Hz, 3H).  $^{13}\text{C}\{^1\text{H}\}$  NMR ( $\text{CDCl}_3$ , 100 MHz):  $\delta$  173.3, 172.6, 154.3, 144.4, 143.3, 140.2, 132.4, 131.0, 129.3, 128.8, 128.2, 127.6, 123.9, 123.8, 121.2, 121.1, 109.1, 68.9, 28.9,

27.3, 15.6. HRMS (ESI) m/z:  $[M+H]^+$  Calcd for  $C_{24}H_{21}N_2O$  353.1648; Found 353.1644.

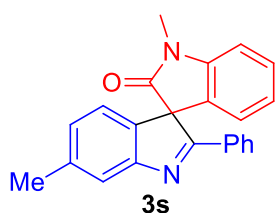

### 1',6-Dimethyl-2-phenylspiro[indole-3,3'-indolin]-2'-one (3s)

Eluent: petroleum ether/ethyl acetate (30:1). White solid (30 mg, 44%), mp 205-206 °C.  $^1H$  NMR ( $CDCl_3$ , 400 MHz):  $\delta$  7.61-7.57 (m, 3H), 7.41-7.33 (m, 2H), 7.28-7.24 (m, 2H), 7.08 (d,  $J = 8.0$  Hz, 1H), 6.97 (t,  $J = 7.6$  Hz, 2H), 6.82 (d,  $J = 7.6$  Hz, 1H), 6.75 (d,  $J = 7.2$  Hz, 1H), 3.41 (s, 3H), 2.43 (s, 3H).  $^{13}C\{^1H\}$  NMR ( $CDCl_3$ , 150 MHz):  $\delta$  174.3, 172.6, 156.7, 144.3, 139.5, 137.1, 132.3, 131.1, 129.3, 128.8, 128.2, 127.7, 127.4, 123.9, 123.7, 122.2, 121.3, 109.1, 68.7, 27.3, 21.7. HRMS (ESI) m/z:  $[M+H]^+$  Calcd for  $C_{23}H_{19}N_2O$  339.1492; Found 339.1494.

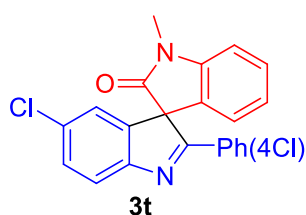

### 5-Chloro-2-(4-chlorophenyl)-1'-methylspiro[indole-3,3'-indolin]-2'-one (3t)

Eluent: petroleum ether/ethyl acetate (30:1). White solid (30 mg, 38%), mp 217-218 °C.  $^1H$  NMR ( $CDCl_3$ , 400 MHz):  $\delta$  7.69 (d,  $J = 8.4$  Hz, 1H), 7.50 (d,  $J = 8.8$  Hz, 2H), 7.44 (td,  $J_1 = 8.0$  Hz,  $J_2 = 1.2$  Hz, 1H), 7.39 (dd,  $J_1 = 8.4$  Hz,  $J_2 = 2.0$  Hz, 1H), 7.27-7.25 (m, 2H), 7.10 (d,  $J = 7.6$  Hz, 1H), 7.02 (t,  $J = 7.6$  Hz, 1H), 6.91 (d,  $J = 1.6$  Hz, 1H), 6.75 (d,  $J = 7.2$  Hz, 1H), 3.42 (s, 3H).  $^{13}C\{^1H\}$  NMR ( $CDCl_3$ , 150 MHz):  $\delta$  173.4, 171.4, 154.7, 144.2, 141.4, 137.8, 132.5, 130.3, 130.0, 129.7, 129.2, 129.0, 126.8, 124.1, 124.0, 122.4, 122.3, 109.4, 68.9, 27.4. HRMS (ESI) m/z:  $[M+Na]^+$  Calcd for  $C_{22}H_{14}Cl_2N_2NaO$  415.0375; Found 415.0362.



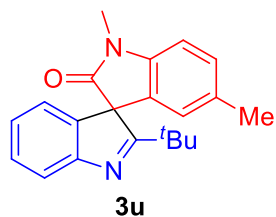

**2-(*tert*-Butyl)-1',5'-dimethylspiro[indole-3,3'-indolin]-2'-one (3u)**

Eluent: petroleum ether/ethyl acetate (10:1). White solid (37 mg, 58%), mp 148-149 °C.  $^1\text{H}$  NMR ( $\text{CDCl}_3$ , 400 MHz):  $\delta$  7.66 (d,  $J = 7.6$  Hz, 1H), 7.36-7.32 (m, 1H), 7.16 (d,  $J = 7.6$  Hz, 1H), 7.09 (t,  $J = 7.6$  Hz, 1H), 6.88 (d,  $J = 8.0$  Hz, 1H), 6.80 (d,  $J = 7.6$  Hz, 1H), 6.57 (s, 1H), 3.32 (s, 3H), 2.23 (s, 3H), 1.17 (s, 9H).  $^{13}\text{C}\{^1\text{H}\}$  NMR ( $\text{CDCl}_3$ , 150 MHz):  $\delta$  187.3, 172.2, 156.1, 142.4, 139.9, 132.9, 129.5, 128.9, 126.9, 126.2, 124.7, 121.4, 120.6, 108.7, 70.2, 38.5, 29.4, 27.1, 21.0. HRMS (ESI)  $m/z$ :  $[\text{M}+\text{H}]^+$  Calcd for  $\text{C}_{21}\text{H}_{23}\text{N}_2\text{O}$  319.1805; Found 319.1795.

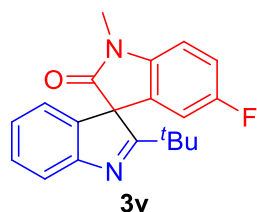

**2-(*tert*-Butyl)-5'-fluoro-1'-methylspiro[indole-3,3'-indolin]-2'-one (3v)**

Eluent: petroleum ether/ethyl acetate (10:1). White solid (40 mg, 62%), mp 130-131 °C.  $^1\text{H}$  NMR ( $\text{CDCl}_3$ , 400 MHz):  $\delta$  7.66 (d,  $J = 7.6$  Hz, 1H), 7.35 (t,  $J = 7.6$  Hz, 1H), 7.12-7.05 (m, 2H), 6.92 (dd,  $J_1 = 8.8$  Hz,  $J_2 = 4.0$  Hz, 1H), 6.79 (d,  $J = 7.2$  Hz, 1H), 6.52 (dd,  $J_1 = 7.6$  Hz,  $J_2 = 2.4$  Hz, 1H), 3.33 (s, 3H), 1.18 (s, 9H).  $^{13}\text{C}\{^1\text{H}\}$  NMR ( $\text{CDCl}_3$ , 100 MHz):  $\delta$  186.4, 171.9, 159.3 (d,  $^1J_{\text{C-F}} = 241.2$  Hz), 156.2, 140.7, 139.3, 129.2, 128.6 (d,  $^3J_{\text{C-F}} = 8.7$  Hz), 126.3, 121.3, 120.8, 115.6 (d,  $^2J_{\text{C-F}} = 23.1$  Hz), 112.1 (d,  $^2J_{\text{C-F}} = 24.6$  Hz), 109.5 (d,  $^3J_{\text{C-F}} = 8.0$  Hz), 70.1, 38.5, 29.4, 27.2.  $^{19}\text{F}$  NMR ( $\text{CDCl}_3$ , 376 MHz):  $\delta$  -119.1 (td,  $J_1 = 8.6$  Hz,  $J_2 = 4.5$  Hz). HRMS (ESI)  $m/z$ :  $[\text{M}+\text{Na}]^+$  Calcd for  $\text{C}_{20}\text{H}_{19}\text{FN}_2\text{NaO}$  345.1374; Found 345.1364.

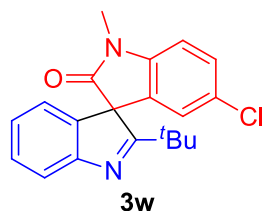

**2-(*tert*-Butyl)-5'-chloro-1'-methylspiro[indole-3,3'-indolin]-2'-one (3w)**

Eluent: petroleum ether/ethyl acetate (10:1). White solid (43 mg, 63%), mp 167-168 °C. <sup>1</sup>H NMR (CDCl<sub>3</sub>, 400 MHz): δ 7.66 (d, *J* = 7.6 Hz, 1H), 7.38-7.33 (m, 2H), 7.11 (t, *J* = 7.6 Hz, 1H), 6.92 (d, *J* = 8.4 Hz, 1H), 6.80 (d, *J* = 7.6 Hz, 1H), 6.75 (d, *J* = 2.0 Hz, 1H), 3.33 (s, 3H), 1.18 (s, 9H). <sup>13</sup>C{<sup>1</sup>H} NMR (CDCl<sub>3</sub>, 100 MHz): δ 186.3, 171.8, 156.2, 143.2, 139.2, 129.3, 129.2, 128.7, 128.6, 126.3, 124.3, 121.3, 120.9, 109.8, 69.8, 38.5, 29.4, 27.2. HRMS (ESI) *m/z*: [M+Na]<sup>+</sup> Calcd for C<sub>20</sub>H<sub>19</sub>ClN<sub>2</sub>NaO 361.1078; Found 361.1068.

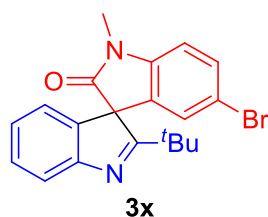

**5'-Bromo-2-(*tert*-butyl)-1'-methylspiro[indole-3,3'-indolin]-2'-one (3x)**

Eluent: petroleum ether/ethyl acetate (10:1). White solid (39 mg, 51%), mp 194-195 °C. <sup>1</sup>H NMR (CDCl<sub>3</sub>, 400 MHz): δ 7.66 (d, *J* = 7.6 Hz, 1H), 7.49 (dd, *J*<sub>1</sub> = 8.4 Hz, *J*<sub>2</sub> = 1.6 Hz, 1H), 7.36 (t, *J* = 8.0 Hz, 1H), 7.11 (t, *J* = 7.6 Hz, 1H), 6.88-6.86 (m, 2H), 6.80 (d, *J* = 7.6 Hz, 1H), 3.33 (s, 3H), 1.18 (s, 9H). <sup>13</sup>C{<sup>1</sup>H} NMR (CDCl<sub>3</sub>, 100 MHz): δ 186.3, 171.7, 156.2, 143.7, 139.2, 132.1, 129.3, 129.1, 127.1, 126.4, 121.3, 120.9, 115.7, 110.3, 69.7, 38.5, 29.4, 27.2. HRMS (ESI) *m/z*: [M+H]<sup>+</sup> Calcd for C<sub>20</sub>H<sub>20</sub>BrN<sub>2</sub>O 383.0754; Found 383.0750.

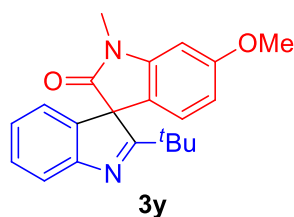

**2-(*tert*-Butyl)-6'-methoxy-1'-methylspiro[indole-3,3'-indolin]-2'-one (3y)**

Eluent: petroleum ether/ethyl acetate (10:1). White solid (38 mg, 57%), mp 183-184 °C. <sup>1</sup>H NMR (CDCl<sub>3</sub>, 400

MHz):  $\delta$  7.65 (d,  $J = 8.0$  Hz, 1H), 7.33 (t,  $J = 7.6$  Hz, 1H), 7.08 (t,  $J = 7.6$  Hz, 1H), 6.80 (d,  $J = 7.6$  Hz, 1H), 6.66 (d,  $J = 8.4$  Hz, 1H), 6.57 (d,  $J = 2.4$  Hz, 1H), 6.49 (dd,  $J_1 = 8.4$  Hz,  $J_2 = 2.4$  Hz, 1H), 3.85 (s, 3H), 3.31 (s, 3H), 1.17 (s, 9H).  $^{13}\text{C}\{^1\text{H}\}$  NMR ( $\text{CDCl}_3$ , 150 MHz):  $\delta$  187.4, 172.8, 161.0, 155.9, 146.0, 140.0, 128.9, 126.2, 124.8, 121.3, 120.6, 118.3, 107.0, 97.0, 69.6, 55.6, 38.4, 29.3, 27.1. HRMS (ESI)  $m/z$ :  $[\text{M}+\text{H}]^+$  Calcd for  $\text{C}_{21}\text{H}_{23}\text{N}_2\text{O}_2$  335.1754; Found 335.1740.

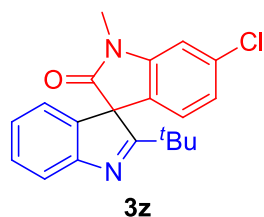

### 2-(*tert*-Butyl)-6'-chloro-1'-methylspiro[indole-3,3'-indolin]-2'-one (3z)

Eluent: petroleum ether/ethyl acetate (10:1). White solid (46 mg, 68%), mp 195-196 °C.  $^1\text{H}$  NMR ( $\text{CDCl}_3$ , 400 MHz):  $\delta$  7.66 (d,  $J = 7.6$  Hz, 1H), 7.35 (td,  $J_1 = 8.0$  Hz,  $J_2 = 1.2$  Hz, 1H), 7.10 (t,  $J = 7.6$  Hz, 1H), 7.01-6.97 (m, 2H), 6.79 (d,  $J = 7.2$  Hz, 1H), 6.68 (d,  $J = 7.6$  Hz, 1H), 3.33 (s, 3H), 1.17 (s, 9H).  $^{13}\text{C}\{^1\text{H}\}$  NMR ( $\text{CDCl}_3$ , 100 MHz):  $\delta$  186.5, 172.2, 156.2, 145.8, 139.3, 135.0, 129.2, 126.3, 125.4, 125.0, 123.1, 121.2, 120.8, 109.7, 69.5, 38.5, 29.4, 27.2. HRMS (ESI)  $m/z$ :  $[\text{M}+\text{H}]^+$  Calcd for  $\text{C}_{20}\text{H}_{20}\text{ClN}_2\text{O}$  339.1259; Found 339.1254.

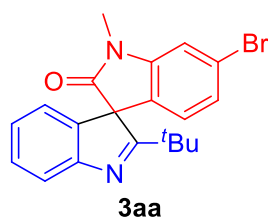

### 6'-Bromo-2-(*tert*-butyl)-1'-methylspiro[indole-3,3'-indolin]-2'-one (3aa)

Eluent: petroleum ether/ethyl acetate (10:1). White solid (50 mg, 65%), mp 191-192 °C.  $^1\text{H}$  NMR ( $\text{CDCl}_3$ , 600 MHz):  $\delta$  7.65 (d,  $J = 7.8$  Hz, 1H), 7.35 (td,  $J_1 = 7.8$  Hz,  $J_2 = 0.6$  Hz, 1H), 7.15-7.13 (m, 2H), 7.09 (t,  $J = 7.8$  Hz, 1H), 6.78 (d,  $J = 7.2$  Hz, 1H), 6.62 (d,  $J = 7.8$  Hz, 1H), 3.32 (s, 3H), 1.17 (s, 9H).  $^{13}\text{C}\{^1\text{H}\}$  NMR ( $\text{CDCl}_3$ , 100 MHz):  $\delta$  186.4, 172.0, 156.1, 146.0, 139.2, 129.2, 126.3, 126.1, 125.9, 125.3, 122.8, 121.3, 120.8, 112.5, 69.5, 38.5, 29.4, 27.2. HRMS (ESI)  $m/z$ :  $[\text{M}+\text{H}]^+$  Calcd for  $\text{C}_{20}\text{H}_{20}\text{BrN}_2\text{O}$  383.0754; Found 383.0740.

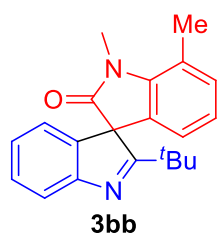

**2-(*tert*-Butyl)-1',7'-dimethylspiro[indole-3,3'-indolin]-2'-one (3bb)**

Eluent: petroleum ether/ethyl acetate (10:1). White solid (40 mg, 63%), mp 186-187 °C. <sup>1</sup>H NMR (CDCl<sub>3</sub>, 400 MHz): δ 7.65 (d, *J* = 7.6 Hz, 1H), 7.33 (td, *J*<sub>1</sub> = 8.0 Hz, *J*<sub>2</sub> = 1.2 Hz, 1H), 7.10-7.07 (m, 2H), 6.86 (d, *J* = 7.6 Hz, 1H), 6.81 (d, *J* = 8.0 Hz, 1H), 6.54 (d, *J* = 7.2 Hz, 1H), 3.61 (s, 3H), 2.67 (s, 3H), 1.18 (s, 9H). <sup>13</sup>C{<sup>1</sup>H} NMR (CDCl<sub>3</sub>, 100 MHz): δ 187.3, 173.0, 156.1, 142.5, 140.3, 132.9, 128.8, 127.3, 126.1, 123.0, 122.0, 121.3, 120.6, 120.5, 69.9, 38.5, 30.4, 29.4, 19.1. HRMS (ESI) *m/z*: [M+H]<sup>+</sup> Calcd for C<sub>21</sub>H<sub>23</sub>N<sub>2</sub>O 319.1805; Found 319.1796.

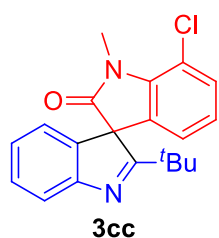

**2-(*tert*-Butyl)-7'-chloro-1'-methylspiro[indole-3,3'-indolin]-2'-one (3cc)**

Eluent: petroleum ether/ethyl acetate (10:1). White solid (42 mg, 62%), mp 158-159 °C. <sup>1</sup>H NMR (CDCl<sub>3</sub>, 400 MHz): δ 7.66 (d, *J* = 8.0 Hz, 1H), 7.35 (td, *J*<sub>1</sub> = 7.6 Hz, *J*<sub>2</sub> = 1.2 Hz, 1H), 7.29 (dd, *J*<sub>1</sub> = 8.4 Hz, *J*<sub>2</sub> = 1.2 Hz, 1H), 7.11 (td, *J*<sub>1</sub> = 7.6 Hz, *J*<sub>2</sub> = 0.8 Hz, 1H), 6.89 (t, *J* = 8.4 Hz, 1H), 6.83 (d, *J* = 7.2 Hz, 1H), 6.61 (dd, *J*<sub>1</sub> = 7.2 Hz, *J*<sub>2</sub> = 1.2 Hz, 1H), 3.71 (s, 3H), 1.18 (s, 9H). <sup>13</sup>C{<sup>1</sup>H} NMR (CDCl<sub>3</sub>, 150 MHz): δ 186.6, 172.4, 156.0, 140.6, 139.6, 131.5, 129.5, 129.2, 126.4, 123.9, 122.6, 121.3, 120.8, 116.1, 69.7, 38.6, 30.5, 29.5. HRMS (ESI) *m/z*: [M+H]<sup>+</sup> Calcd for C<sub>20</sub>H<sub>20</sub>ClN<sub>2</sub>O 339.1259; Found 339.1246.

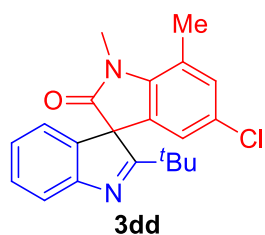

**2-(*tert*-Butyl)-5'-chloro-1',7'-dimethylspiro[indole-3,3'-indolin]-2'-one (3dd)**

Eluent: petroleum ether/ethyl acetate (10:1). White solid (40 mg, 57%), mp 223-224 °C. <sup>1</sup>H NMR (CDCl<sub>3</sub>, 400 MHz): δ 7.65 (d, *J* = 8.0 Hz, 1H), 7.35 (t, *J* = 7.6 Hz, 1H), 7.12-7.08 (m, 2H), 6.81 (d, *J* = 7.6 Hz, 1H), 6.53 (d, *J* = 2.0 Hz, 1H), 3.59 (s, 3H), 2.64 (s, 3H), 1.18 (s, 9H). <sup>13</sup>C{<sup>1</sup>H} NMR (CDCl<sub>3</sub>, 100 MHz): δ 186.5, 172.6, 156.1, 141.1, 139.7, 132.4, 129.14, 129.09, 128.0, 126.3, 122.0, 121.3, 120.8, 69.7, 38.5, 30.4, 29.5, 18.9. HRMS (ESI) *m/z*: [M+H]<sup>+</sup> Calcd for C<sub>21</sub>H<sub>22</sub>ClN<sub>2</sub>O 353.1415; Found 353.1405.

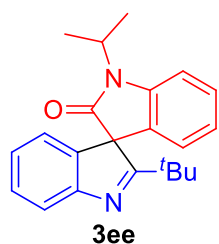

**2-(*tert*-Butyl)-1'-isopropylspiro[indole-3,3'-indolin]-2'-one (3ee)**

Eluent: petroleum ether/ethyl acetate (10:1). White solid (38 mg, 57%), mp 169-170 °C. <sup>1</sup>H NMR (CDCl<sub>3</sub>, 600 MHz): δ 7.65 (d, *J* = 7.8 Hz, 1H), 7.35-7.31 (m, 2H), 7.15 (d, *J* = 7.8 Hz, 1H), 7.08 (td, *J*<sub>1</sub> = 7.8 Hz, *J*<sub>2</sub> = 1.2 Hz, 1H), 6.95 (td, *J*<sub>1</sub> = 7.8 Hz, *J*<sub>2</sub> = 0.6 Hz, 1H), 6.77-6.74 (m, 2H), 4.74-4.69 (m, 1H), 1.58 (d, *J* = 6.6 Hz, 3H), 1.54 (d, *J* = 7.2 Hz, 3H), 1.20 (s, 9H). <sup>13</sup>C{<sup>1</sup>H} NMR (CDCl<sub>3</sub>, 150 MHz): δ 187.3, 171.6, 156.1, 143.4, 140.3, 128.83, 128.80, 127.4, 126.1, 124.4, 122.5, 121.0, 120.6, 110.5, 70.3, 44.5, 38.4, 29.4, 19.5, 18.8. HRMS (ESI) *m/z*: [M+H]<sup>+</sup> Calcd for C<sub>22</sub>H<sub>25</sub>N<sub>2</sub>O 333.1961; Found 333.1959.

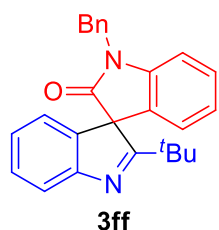

**1'-Benzyl-2-(*tert*-butyl)spiro[indole-3,3'-indolin]-2'-one (3ff)**

Eluent: petroleum ether/ethyl acetate (10:1). White solid (41 mg, 54%), mp 181-182 °C.  $^1\text{H}$  NMR ( $\text{CDCl}_3$ , 400 MHz):  $\delta$  7.67 (d,  $J = 7.6$  Hz, 1H), 7.41 (d,  $J = 7.6$  Hz, 2H), 7.38-7.31 (m, 4H), 7.27-7.23 (m, 1H), 7.11-7.08 (m, 1H), 6.96-6.93 (m, 2H), 6.76 (t,  $J = 8.4$  Hz, 2H), 5.18 (d,  $J = 15.2$  Hz, 1H), 4.84 (d,  $J = 15.2$  Hz, 1H), 1.18 (s, 9H).  $^{13}\text{C}\{^1\text{H}\}$  NMR ( $\text{CDCl}_3$ , 100 MHz):  $\delta$  187.1, 172.3, 156.1, 143.8, 140.1, 135.6, 129.0, 128.97, 128.91, 128.0, 127.9, 127.1, 126.2, 124.2, 123.1, 121.2, 120.7, 110.0, 70.1, 44.7, 38.5, 29.5. HRMS (ESI)  $m/z$ :  $[\text{M}+\text{H}]^+$  Calcd for  $\text{C}_{26}\text{H}_{25}\text{N}_2\text{O}$  381.1961; Found 381.1951.

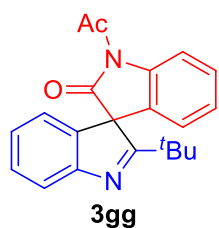

### 1'-Acetyl-2-(*tert*-butyl)spiro[indole-3,3'-indolin]-2'-one (3gg)

Eluent: petroleum ether/ethyl acetate (30:1). White solid (16 mg, 24%), mp 146-147 °C.  $^1\text{H}$  NMR ( $\text{CDCl}_3$ , 400 MHz):  $\delta$  8.37 (d,  $J = 8.0$  Hz, 1H), 7.69 (d,  $J = 8.0$  Hz, 1H), 7.43-7.37 (m, 2H), 7.13 (t,  $J = 7.6$  Hz, 2H), 6.84 (d,  $J = 7.6$  Hz, 1H), 6.77 (dd,  $J_1 = 7.6$  Hz,  $J_2 = 0.8$  Hz, 1H), 2.68 (s, 3H), 1.20 (s, 9H).  $^{13}\text{C}\{^1\text{H}\}$  NMR ( $\text{CDCl}_3$ , 100 MHz):  $\delta$  186.6, 173.1, 170.8, 155.8, 141.0, 140.5, 129.5, 126.6, 126.3, 125.7, 123.8, 121.4, 120.9, 117.5, 70.5, 38.6, 29.6, 26.7. HRMS (ESI)  $m/z$ :  $[\text{M}+\text{Na}]^+$  Calcd for  $\text{C}_{21}\text{H}_{20}\text{N}_2\text{NaO}_2$  355.1417; Found 355.1409.

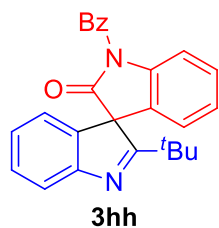

### 1'-Benzoyl-2-(*tert*-butyl)spiro[indole-3,3'-indolin]-2'-one (3hh)

Eluent: petroleum ether/ethyl acetate (30:1). White solid (30 mg, 38%), mp 182-183 °C.  $^1\text{H}$  NMR ( $\text{CDCl}_3$ , 400 MHz):  $\delta$  7.96 (d,  $J = 8.4$  Hz, 1H), 7.75-7.72 (m, 2H), 7.67 (d,  $J = 8.0$  Hz, 1H), 7.56 (t,  $J = 7.6$  Hz, 1H), 7.46-7.38 (m, 4H), 7.21-7.14 (m, 2H), 7.02 (d,  $J = 7.6$  Hz, 1H), 6.85-6.83 (m, 1H), 1.23 (s, 9H).  $^{13}\text{C}\{^1\text{H}\}$  NMR ( $\text{CDCl}_3$ , 100 MHz):  $\delta$  186.8, 171.8, 169.0, 155.8, 141.1, 140.3, 133.5, 133.3, 129.52, 129.46, 129.44,

128.4, 126.8, 126.6, 125.5, 124.1, 121.13, 121.05, 116.0, 70.6, 38.5, 29.6. HRMS (ESI)  $m/z$ :  $[M+Na]^+$  Calcd for  $C_{26}H_{22}N_2NaO_2$  417.1573; Found 417.1567.

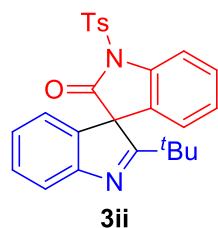

### 2-(*tert*-Butyl)-1'-tosylspiro[indole-3,3'-indolin]-2'-one (**3ii**)

Eluent: petroleum ether/ethyl acetate (30:1). White solid (40 mg, 45%), mp 241-242 °C.  $^1H$  NMR ( $CDCl_3$ , 400 MHz):  $\delta$  8.12 (d,  $J = 8.4$  Hz, 1H), 7.99 (d,  $J = 8.0$  Hz, 2H), 7.59 (d,  $J = 7.6$  Hz, 1H), 7.42 (t,  $J = 7.6$  Hz, 1H), 7.34-7.29 (m, 3H), 7.08 (t,  $J = 7.6$  Hz, 1H), 6.99 (t,  $J = 7.6$  Hz, 1H), 6.69 (d,  $J = 7.6$  Hz, 1H), 6.48 (d,  $J = 7.2$  Hz, 1H), 2.44 (s, 3H), 0.98 (s, 9H).  $^{13}C\{^1H\}$  NMR ( $CDCl_3$ , 100 MHz):  $\delta$  186.2, 170.2, 155.6, 146.1, 140.1, 139.9, 134.5, 129.81, 129.77, 129.4, 128.2, 126.4, 126.2, 125.3, 124.3, 121.3, 120.8, 114.7, 69.9, 38.2, 29.4, 21.8. HRMS (ESI)  $m/z$ :  $[M+Na]^+$  Calcd for  $C_{26}H_{24}N_2NaO_3S$  467.1400; Found 467.1385.

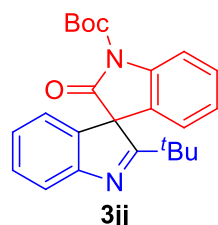

### *tert*-Butyl 2-(*tert*-butyl)-2'-oxospiro[indole-3,3'-indoline]-1'-carboxylate (**3jj**)

Eluent: petroleum ether/ethyl acetate (30:1). White solid (25 mg, 32%), mp 115-116 °C.  $^1H$  NMR ( $CDCl_3$ , 400 MHz):  $\delta$  7.98 (d,  $J = 8.4$  Hz, 1H), 7.65 (d,  $J = 8.0$  Hz, 1H), 7.40-7.34 (m, 2H), 7.13-7.06 (m, 2H), 6.87 (d,  $J = 7.2$  Hz, 1H), 6.74 (dd,  $J_1 = 7.6$  Hz,  $J_2 = 1.2$  Hz, 1H), 1.64 (s, 9H), 1.20 (s, 9H).  $^{13}C\{^1H\}$  NMR ( $CDCl_3$ , 100 MHz):  $\delta$  186.9, 170.0, 155.8, 149.1, 140.7, 140.6, 129.33, 129.26, 126.4, 126.0, 124.9, 124.0, 121.6, 120.7, 115.8, 85.0, 70.5, 38.5, 29.5, 28.1. HRMS (ESI)  $m/z$ :  $[M+H]^+$  Calcd for  $C_{24}H_{27}N_2O_3$  391.2016; Found 391.2010.

## 2. Structural elaborations of **3a**

## 2.1. Synthesis of **4**<sup>[4]</sup>

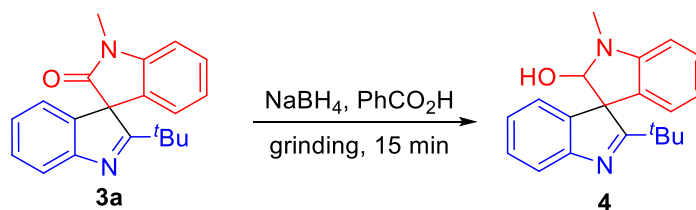

A mixture of **3a** (60.9 mg, 0.2 mmol), sodium borohydride (15.1 mg, 0.4 mmol) and benzoic acid (48.8 mg, 0.4 mmol) was ground with an agate mortar and pestle at room temperature for 15 min. It was then quenched with saturated aqueous solution of NaHCO<sub>3</sub> and extracted with CH<sub>2</sub>Cl<sub>2</sub> (10 mL × 3). The combined organic layers were washed with water and dried over anhydrous Na<sub>2</sub>SO<sub>4</sub>, filtered and concentrated under reduced pressure. The residue was purified by flash column chromatography on silica gel with petroleum ether/ethyl acetate (20:1) as the eluent to give **4** (36 mg, 59%).

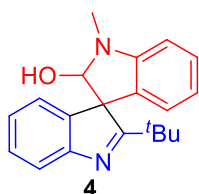

### 2-(*tert*-Butyl)-1'-methylspiro[indole-3,3'-indolin]-2'-ol (**4**)

Eluent: petroleum ether/ethyl acetate (20:1). Yellow solid (36 mg, 59%), mp 187-188 °C. <sup>1</sup>H NMR (400 MHz, CDCl<sub>3</sub>): δ 7.32 (td, *J*<sub>1</sub> = 7.6 Hz, *J*<sub>2</sub> = 0.8 Hz, 1H), 7.22 (d, *J* = 7.2 Hz, 1H), 7.11-7.06 (m, 2H), 6.87-6.84 (m, 2H), 6.65 (t, *J* = 7.6 Hz, 1H), 6.44 (d, *J* = 7.6 Hz, 1H), 4.13 (s, 1H), 4.02 (s, 1H), 3.24 (s, 3H), 0.88 (s, 9H). <sup>13</sup>C{<sup>1</sup>H} NMR (CDCl<sub>3</sub>, 100 MHz): δ 176.2, 151.1, 144.2, 133.6, 132.0, 128.8, 128.4, 124.0, 123.1, 122.7, 119.8, 111.1, 107.8, 80.5, 59.3, 34.2, 28.0, 26.4. HRMS (ESI) *m/z*: [M+H]<sup>+</sup> Calcd for C<sub>20</sub>H<sub>23</sub>N<sub>2</sub>O 307.1805; Found 307.1800.

## 2.2. Synthesis of **5**<sup>[5]</sup>

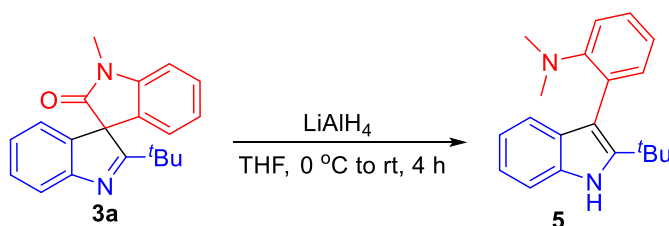



Under an argon atmosphere, a solution of  $\text{LiAlH}_4$  (75.9 mg, 2.0 mmol) in anhydrous THF (2 mL) was added dropwise to a solution of **3a** (60.9 mg, 0.2 mmol) in anhydrous THF (2 mL) at 0 °C. The resulting mixture was then stirred at room temperature for 4 h. Upon completion, it was quenched with saturated aqueous solution of  $\text{NaHCO}_3$ , filtered and extracted with ethyl acetate (10 mL  $\times$  3). The combined organic layers were washed with water and dried over anhydrous  $\text{Na}_2\text{SO}_4$ , filtered and concentrated under reduced pressure. The residue was purified by column chromatography on silica gel with petroleum ether/ethyl acetate (30:1) as the eluent to give **5** (27 mg, 46%).

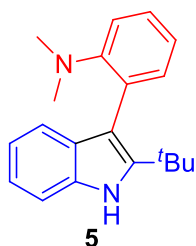

### 2-(2-(*tert*-Butyl)-1*H*-indol-3-yl)-*N,N*-dimethylaniline (**5**)

Eluent: petroleum ether/ethyl acetate (30:1). White solid (27 mg, 46%), mp 67-68 °C.  $^1\text{H}$  NMR ( $\text{CDCl}_3$ , 400 MHz):  $\delta$  7.95 (s, 1H), 7.30-7.25 (m, 2H), 7.22-7.17 (m, 2H), 7.13 (td,  $J_1 = 8.0$  Hz,  $J_2 = 1.2$  Hz, 1H), 7.03-6.98 (m, 2H), 6.93 (td,  $J_1 = 7.6$  Hz,  $J_2 = 1.2$  Hz, 1H), 2.48 (s, 6H), 1.27 (s, 9H).  $^{13}\text{C}\{^1\text{H}\}$  NMR ( $\text{CDCl}_3$ , 100 MHz):  $\delta$  153.4, 141.8, 134.5, 133.9, 130.4, 129.3, 127.7, 121.3, 120.3, 119.38, 119.36, 117.2, 112.0, 109.8, 42.9, 33.5, 30.1. HRMS (ESI)  $m/z$ :  $[\text{M}+\text{H}]^+$  Calcd for  $\text{C}_{20}\text{H}_{25}\text{N}_2$  293.2012; Found 293.2011.

## 3. Structural elaborations of **3jj**

### 3.1. Synthesis of **6**<sup>[6]</sup>

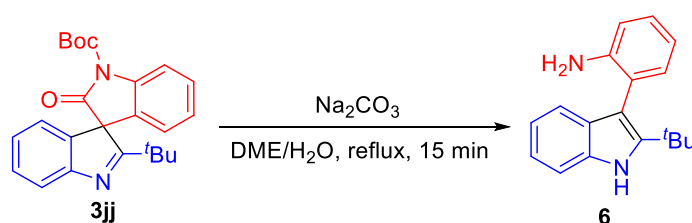

A solution of  $\text{Na}_2\text{CO}_3$  (12.7 mg, 0.12 mmol) in  $\text{H}_2\text{O}$  (2 mL) was added to a solution of **3jj** (39 mg, 0.1 mmol) in DME (2 mL), and the resulting mixture was stirred under reflux for 15 min. Upon completion, it was

cooled to room temperature, and extracted with  $\text{CH}_2\text{Cl}_2$  (10 mL  $\times$  3). The combined organic layers were washed with water and dried over anhydrous  $\text{Na}_2\text{SO}_4$ , filtered and concentrated under reduced pressure. The residue was purified by column chromatography on silica gel with petroleum ether/ethyl acetate (30:1) as the eluent to give **6** (20 mg, 76%).

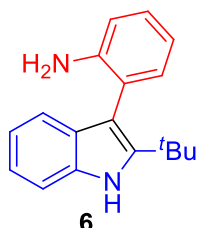

### 2-(2-(*tert*-Butyl)-1*H*-indol-3-yl)aniline (**6**)

Eluent: petroleum ether/ethyl acetate (30:1). White solid (20 mg, 76%), mp 134-135 °C.  $^1\text{H}$  NMR ( $\text{CDCl}_3$ , 400 MHz):  $\delta$  8.11 (s, 1H), 7.36 (d,  $J = 8.0$  Hz, 1H), 7.22-7.14 (m, 4H), 7.03 (t,  $J = 7.6$  Hz, 1H), 6.82-6.78 (m, 2H), 3.57 (s, 2H), 1.34 (s, 9H).  $^{13}\text{C}\{^1\text{H}\}$  NMR ( $\text{CDCl}_3$ , 150 MHz):  $\delta$  145.7, 143.9, 134.3, 132.9, 129.5, 128.3, 121.8, 121.6, 119.7, 119.0, 117.9, 114.7, 110.2, 108.8, 33.3, 30.4. HRMS (ESI)  $m/z$ :  $[\text{M}+\text{H}]^+$  Calcd for  $\text{C}_{18}\text{H}_{21}\text{N}_2$  265.1699; Found 265.1685.

## 4. Structural elaborations of **3g**

### 4.1. Synthesis of **7**<sup>[7]</sup>

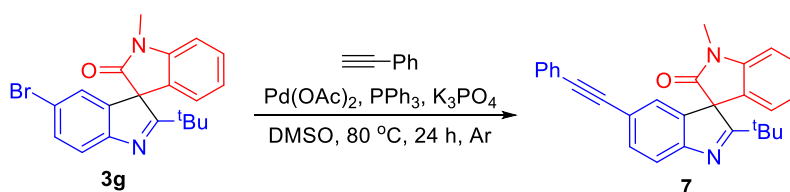

To a reaction tube equipped with a stir bar were added **3g** (38.3 mg, 0.1 mmol), ethynylbenzene (16.5  $\mu\text{L}$ , 0.15 mmol),  $\text{PPh}_3$  (5.2 mg, 0.02 mmol),  $\text{K}_3\text{PO}_4$  (25.5 mg, 0.12 mmol),  $\text{Pd}(\text{OAc})_2$  (1.1 mg, 0.005 mmol) and DMSO (1 mL), and the resulting mixture was stirred at 80 °C for 24 h under an argon atmosphere. Upon completion, it was diluted with ethyl acetate (20 mL) and washed with water. The organic layer was dried over anhydrous  $\text{Na}_2\text{SO}_4$  and evaporated under reduced pressure. The residue was purified by column chromatography on silica gel with petroleum ether/ethyl acetate (10:1) as the eluent to give **7** (23 mg, 57%).

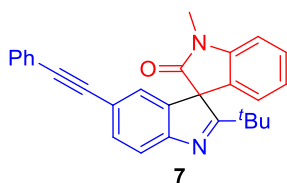

### 2-(*tert*-Butyl)-1'-methyl-5-(phenylethynyl)spiro[indole-3,3'-indolin]-2'-one (**7**)

Eluent: petroleum ether/ethyl acetate (10:1). Brown solid (23 mg, 57%), mp 150-151 °C. <sup>1</sup>H NMR (CDCl<sub>3</sub>, 400 MHz): δ 7.63 (d, *J* = 8.0 Hz, 1H), 7.53 (dd, *J*<sub>1</sub> = 8.0 Hz, *J*<sub>2</sub> = 1.6 Hz, 1H), 7.45-7.42 (m, 2H), 7.38 (td, *J*<sub>1</sub> = 8.0 Hz, *J*<sub>2</sub> = 1.2 Hz, 1H), 7.31-7.28 (m, 3H), 7.03-6.97 (m, 3H), 6.78 (d, *J* = 7.2 Hz, 1H), 3.36 (s, 3H), 1.18 (s, 9H). <sup>13</sup>C{<sup>1</sup>H} NMR (CDCl<sub>3</sub>, 100 MHz): δ 188.3, 171.8, 156.1, 144.7, 140.1, 132.8, 131.5, 129.4, 128.33, 128.26, 126.5, 124.6, 124.2, 123.3, 123.1, 121.0, 120.6, 109.1, 89.7, 89.4, 70.0, 38.6, 29.3, 27.1. HRMS (ESI) *m/z*: [M+H]<sup>+</sup> Calcd for C<sub>28</sub>H<sub>25</sub>N<sub>2</sub>O 405.1961; Found 405.1953.

### 4.2. Synthesis of **8**<sup>[7]</sup>

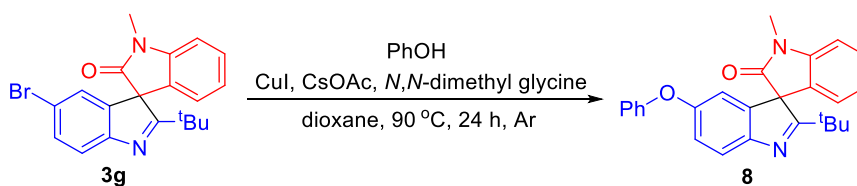

To a reaction tube equipped with a stir bar were added **3g** (38.3 mg, 0.1 mmol), phenol (14.1 mg, 0.15 mmol), *N,N*-dimethyl glycine hydrochloride (4.2 mg, 0.03 mmol), Cs<sub>2</sub>CO<sub>3</sub> (65.2 mg, 0.2 mmol), CuI (1.9 mg, 0.01 mmol) and dioxane (1 mL), and the resulting mixture was stirred at 90 °C for 24 h under an argon atmosphere. Upon completion, it was diluted with ethyl acetate (20 mL) and washed with water. The organic layer was dried over anhydrous Na<sub>2</sub>SO<sub>4</sub> and evaporated under reduced pressure. The residue was purified by column chromatography on silica gel with petroleum ether/ethyl acetate (10:1) as the eluent to give **8** (16 mg, 40%).

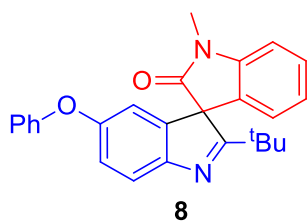

## 2-(*tert*-Butyl)-1'-methyl-5-phenoxySpiro[indole-3,3'-indolin]-2'-one (**8**)

Eluent: petroleum ether/ethyl acetate (10:1). White solid (16 mg, 40%), mp > 300 °C. <sup>1</sup>H NMR (CDCl<sub>3</sub>, 400 MHz): δ 7.59 (d, *J* = 8.4 Hz, 1H), 7.35 (td, *J*<sub>1</sub> = 8.0 Hz, *J*<sub>2</sub> = 1.2 Hz, 1H), 7.29-7.25 (m, 2H), 7.06-6.98 (m, 2H), 6.97-6.94 (m, 2H), 6.91-6.89 (m, 2H), 6.79 (d, *J* = 7.2 Hz, 1H), 6.53 (d, *J* = 2.4 Hz, 1H), 3.32 (s, 3H), 1.16 (s, 9H). <sup>13</sup>C{<sup>1</sup>H} NMR (CDCl<sub>3</sub>, 100 MHz): δ 186.4, 172.0, 157.5, 155.4, 152.0, 144.6, 141.6, 129.7, 129.3, 126.8, 124.1, 123.3, 123.0, 121.3, 119.3, 118.3, 113.2, 109.0, 70.3, 38.5, 29.4, 27.1. HRMS (ESI) *m/z*: [M+H]<sup>+</sup> Calcd for C<sub>26</sub>H<sub>25</sub>N<sub>2</sub>O<sub>2</sub> 397.1911; Found 397.1892.

## 5. Gram-Scale Synthesis of **3a**

To a reaction tube equipped with a stir bar were charged with *N*-phenylpivalimidamide (**1a**, 0.881 g, 5 mmol), DCE (50 mL), [RhCp\*Cl<sub>2</sub>]<sub>2</sub> (61.8 mg, 0.1 mmol), 1-AdCO<sub>2</sub>H (1.803 g, 10.0 mmol), CsOAc (48.0 mg, 0.25 mmol), and 3-diazo-1-methylindolin-2-one (**2a**, 1.298 g, 7.5 mmol). The tube was sealed, and the resulting mixture was stirred at 60 °C (oil bath) under air for 4 h. Upon completion, it was cooled to room temperature, quenched with saturated aqueous solution of NaHCO<sub>3</sub>, and then extracted with dichloromethane (75 mL × 3). The combined organic layers were washed with water, dried over anhydrous Na<sub>2</sub>SO<sub>4</sub>, filtered and evaporated under reduced pressure. The residue was purified by silica gel chromatography using petroleum ether/ethyl acetate (10:1) as eluent to afford **3a** (0.897 g, 59%).

### III. Mechanism studies

#### 1. Studies on the reversibility of C–H bond activation

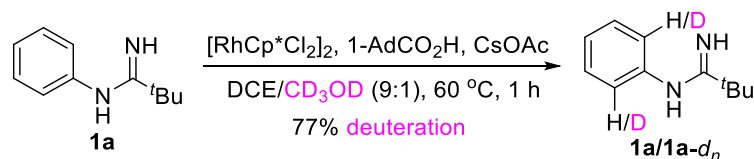

To a reaction tube equipped with a stir bar were charged with **1a** (35.2 mg, 0.2 mmol), CD<sub>3</sub>OD (0.2 mL), DCE (1.8 mL),  $[\text{RhCp}^*\text{Cl}_2]_2$  (2.5 mg, 0.004 mmol), 1-AdCO<sub>2</sub>H (72.1 mg, 0.4 mmol) and CsOAc (1.9 mg, 0.01 mmol). The resulting mixture was stirred at 60 °C (oil bath) under air for 1 h. It was then cooled to room temperature, quenched with saturated aqueous solution of NaHCO<sub>3</sub>, and then extracted with dichloromethane (10 mL × 3). The combined organic layers were washed with water, dried over anhydrous Na<sub>2</sub>SO<sub>4</sub>, filtered and evaporated under reduced pressure. The residue was purified by silica gel chromatography using petroleum ether/ethyl acetate (1:1) as eluent to give a mixture of **1a** and **1a-d<sub>n</sub>**. Upon analyzing the <sup>1</sup>H NMR spectrum of the mixture as shown in Fig. S1, the deuteration ratio was determined to be 77%.

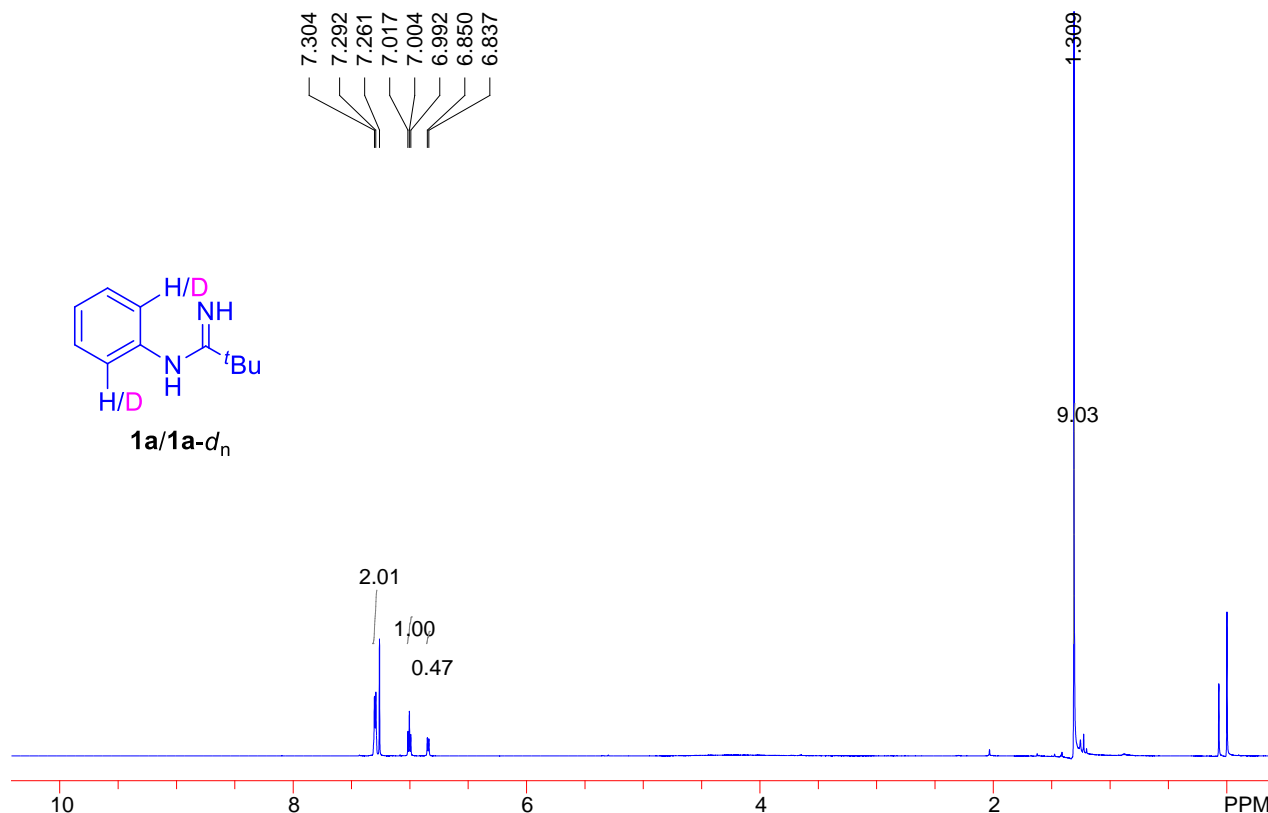

**Fig. S1** The <sup>1</sup>H NMR spectrum of products obtained from H/D exchange experiment (I)

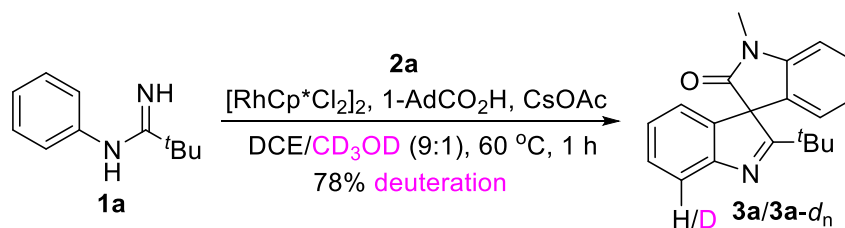

To a reaction tube equipped with a stir bar were charged with **1a** (35.2 mg, 0.2 mmol), CD<sub>3</sub>OD (0.2 mL), DCE (1.8 mL), [RhCp\*Cl<sub>2</sub>]<sub>2</sub> (2.5 mg, 0.004 mmol), 1-AdCO<sub>2</sub>H (72.1 mg, 0.4 mmol), CsOAc (1.9 mg, 0.01 mmol) and **2a** (52.0 mg, 0.3 mmol). The resulting mixture was stirred at 60 °C (oil bath) under air for 1 h. It was then cooled to room temperature, quenched with saturated aqueous solution of NaHCO<sub>3</sub> and extracted with dichloromethane (10 mL × 3). The combined organic layers were washed with water, dried over anhydrous Na<sub>2</sub>SO<sub>4</sub>, filtered and evaporated under reduced pressure. The residue was purified by silica gel chromatography using petroleum ether/ethyl acetate (10:1) as eluent to give a mixture of **3a** and **3a-d<sub>n</sub>**. Upon analyzing the <sup>1</sup>H NMR spectrum of the mixture as shown in Fig. S2, the deuteration ratio was determined to be 78%.

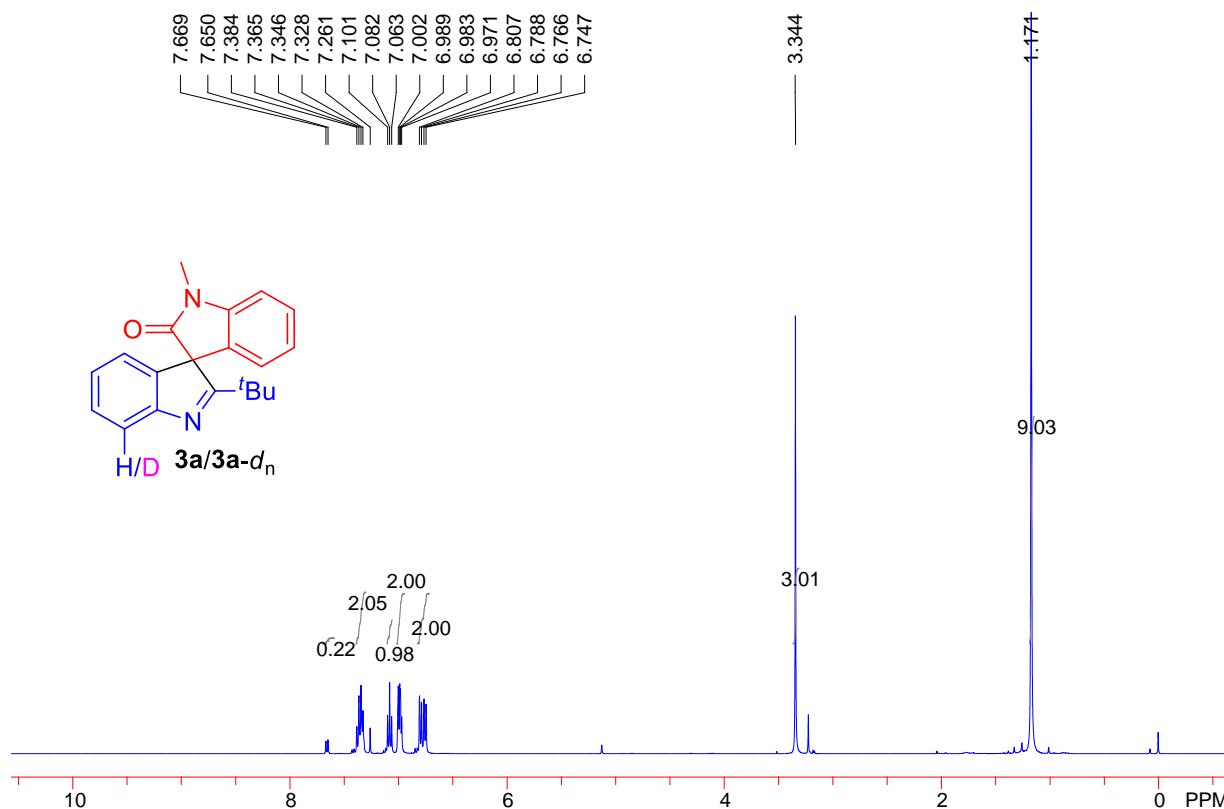

**Fig. S2** The <sup>1</sup>H NMR spectrum of products obtained from H/D exchange experiment (II)

## 2. Kinetic isotope effect study

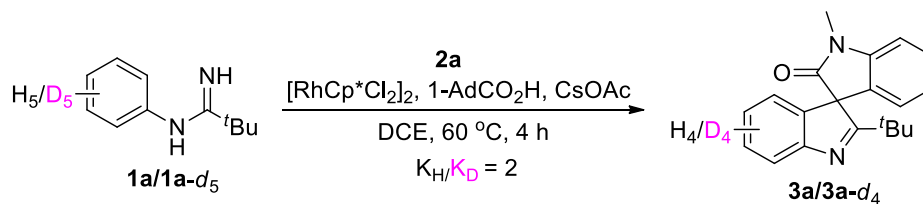

To a reaction tube equipped with a stir bar were added **1a** (17.6 mg, 0.1 mmol), **1a-d<sub>5</sub>** (18.1 mg, 0.1 mmol), DCE (1.0 mL), **2a** (26.0 mg, 0.15 mmol), [RhCp\*Cl<sub>2</sub>]<sub>2</sub> (1.2 mg, 0.002 mmol), 1-AdCO<sub>2</sub>H (36.0 mg, 0.2 mmol) and CsOAc (1.0 mg, 0.005 mmol) with stirring. The tube was sealed, and the resulting mixture was stirred at 60 °C (oil bath) under air for 4 h. Upon completion, it was cooled to room temperature, quenched with saturated aqueous solution of NaHCO<sub>3</sub>, and then extracted with dichloromethane (10 mL × 3). The combined organic layers were washed with water, dried over anhydrous Na<sub>2</sub>SO<sub>4</sub>, filtered and evaporated under reduced pressure. The residue was purified by silica gel chromatography using petroleum ether/ethyl acetate (10:1) as eluent to afford a mixture of **3a** and **3a-d<sub>4</sub>**. Upon analyzing the <sup>1</sup>H NMR spectrum of the mixture as shown in Fig. S3, the ratio of **3a** to **3a-d<sub>4</sub>** was determined to be 0.67:0.33. Accordingly, the intermolecular KIE ( $k_{\text{H}}/k_{\text{D}}$ ) was calculated to be 2.

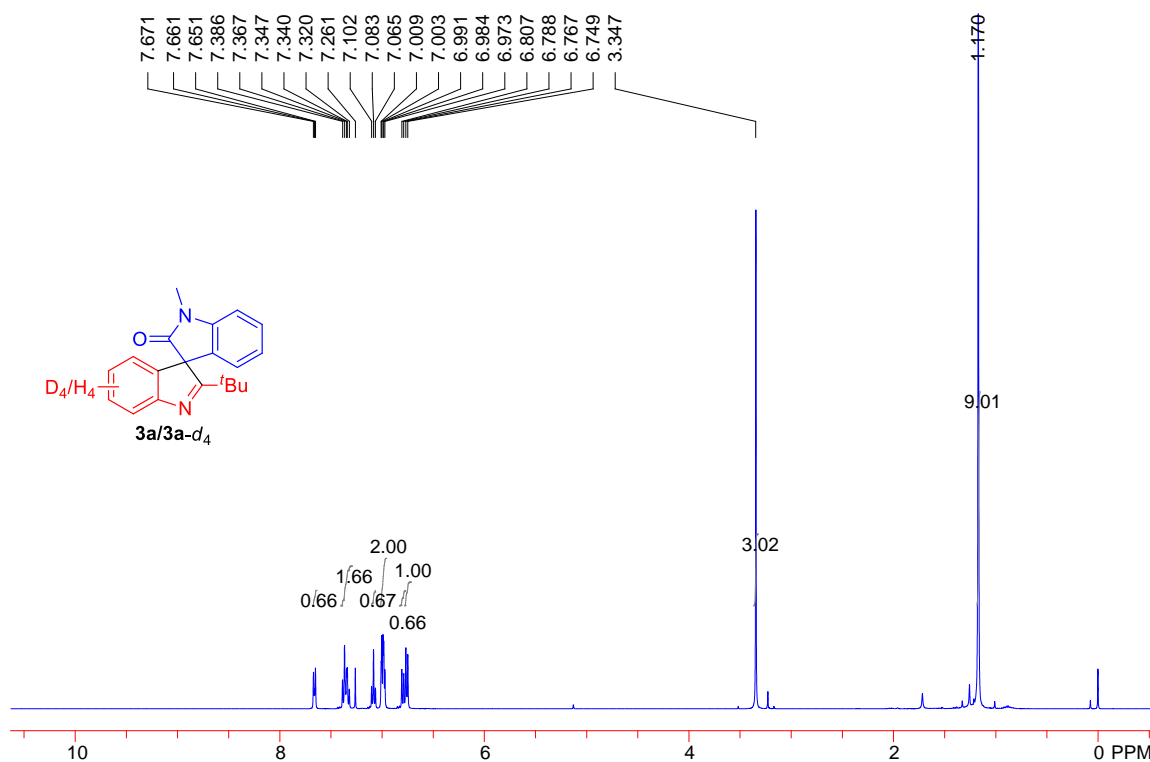

**Fig. S3** The <sup>1</sup>H NMR spectrum of products obtained from the intermolecular KIE experiment

### 3. Competition experiment between **1b** and **1f**

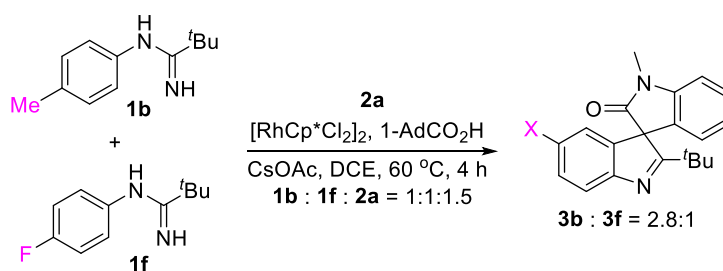

To a reaction tube equipped with a stir bar were charged with *N*-(*p*-tolyl)pivalimidamide (**1b**, 38.1 mg, 0.2 mmol), *N*-(4-fluorophenyl)pivalimidamide (**1f**, 38.8 mg, 0.2 mmol), 3-diazo-1-methylindolin-2-one (**2a**, 52.0 mg, 0.3 mmol), [Cp\*RhCl<sub>2</sub>]<sub>2</sub> (2.5 mg, 0.004 mmol), 1-AdCO<sub>2</sub>H (72.1 mg, 0.4 mmol), CsOAc (1.9 mg, 0.01 mmol) and DCE (2.0 mL). The mixture was stirred at 60 °C (oil bath) for 4 h. Upon completion, it was cooled to room temperature, quenched with saturated aqueous solution of NaHCO<sub>3</sub>, and then extracted with dichloromethane (10 mL × 3). The combined organic layers were washed with water, dried over anhydrous Na<sub>2</sub>SO<sub>4</sub>, filtered and evaporated under reduced pressure. The residue was purified by silica gel chromatography using petroleum ether/ethyl acetate (10:1) as eluent to afford **3b** (36 mg, 57%) and **3f** (13 mg, 20%).



#### IV. Copies of NMR spectra of 3a-3jj

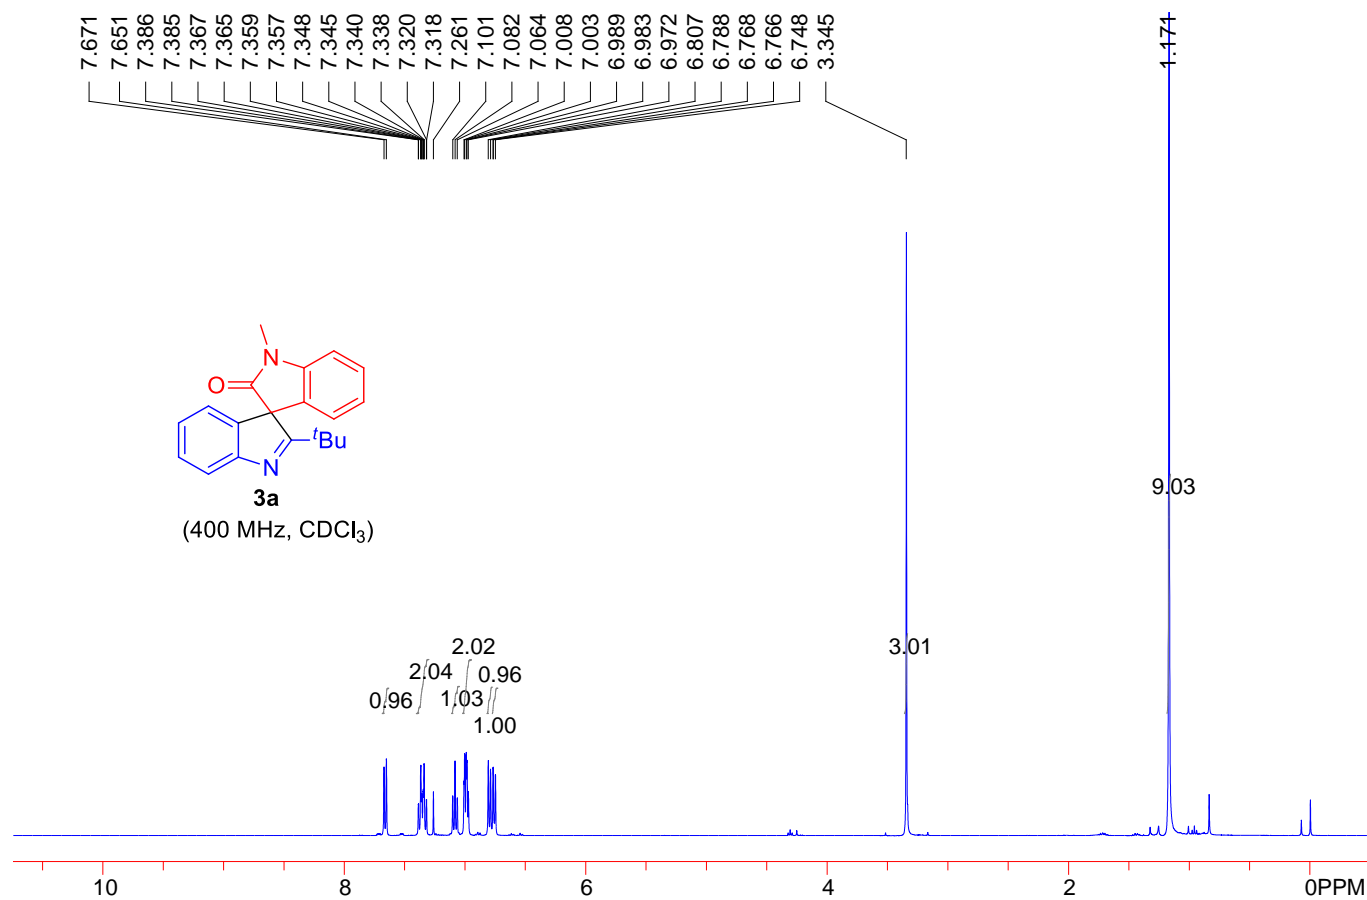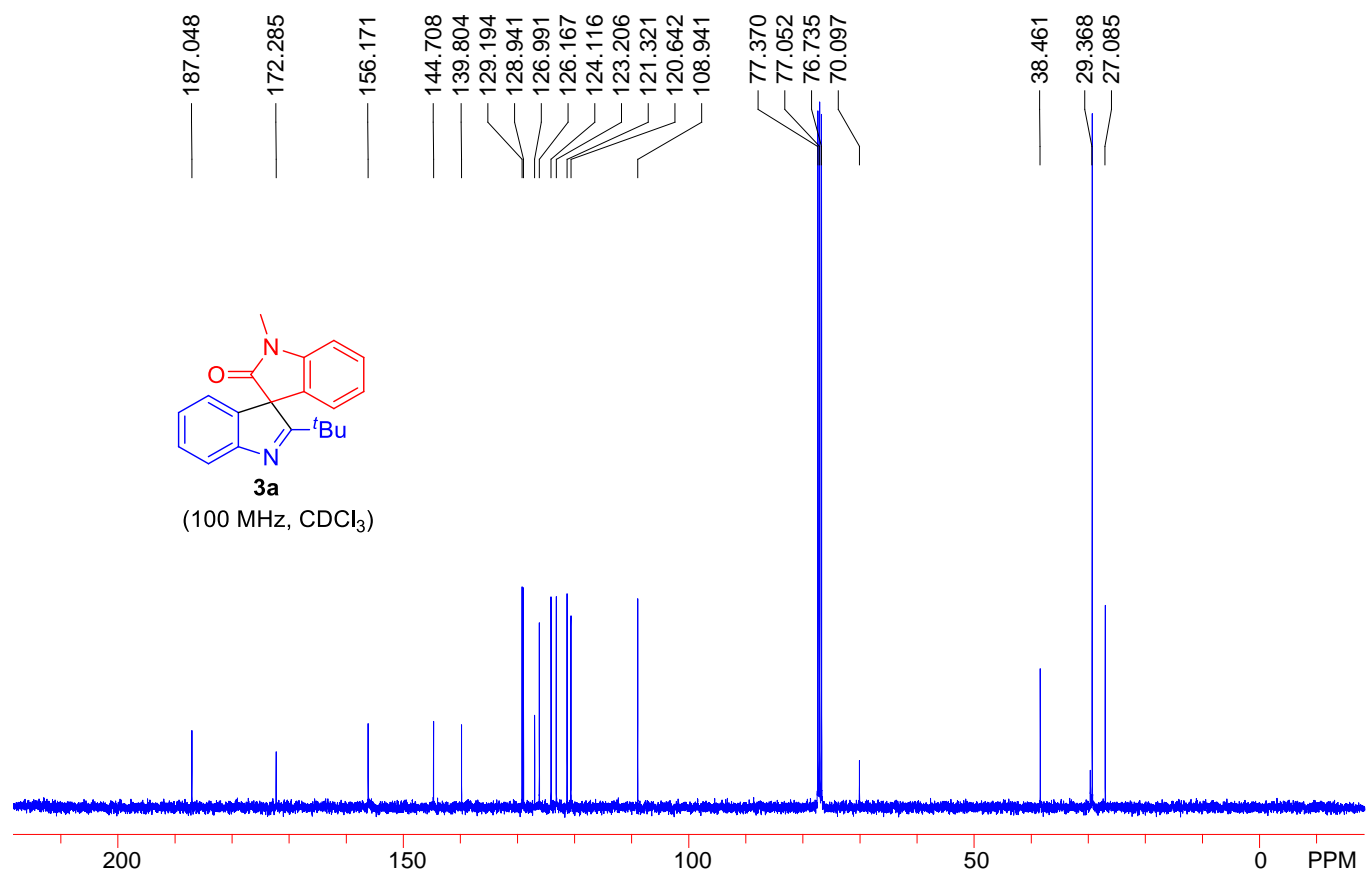

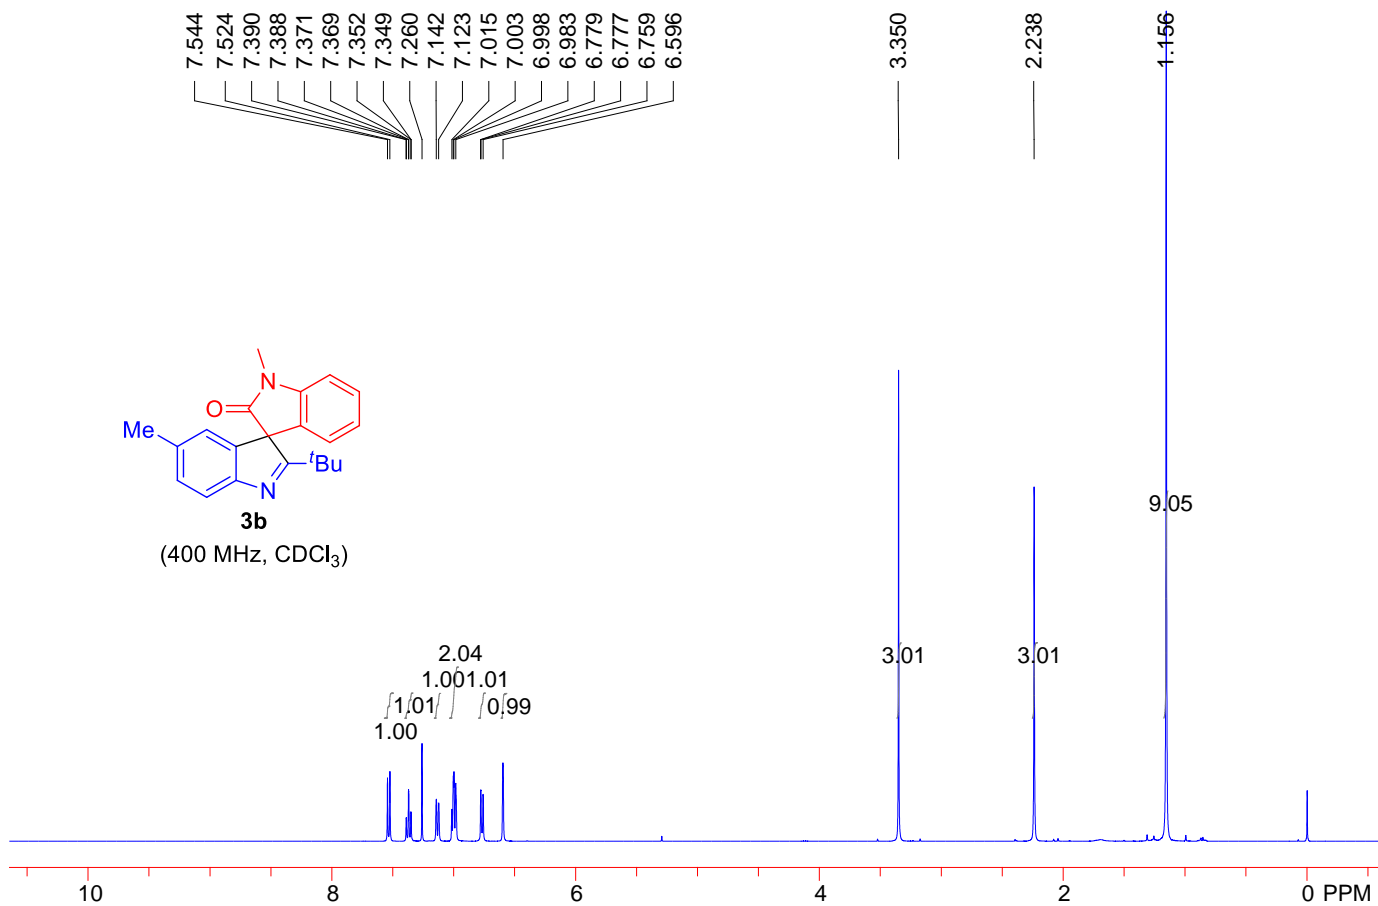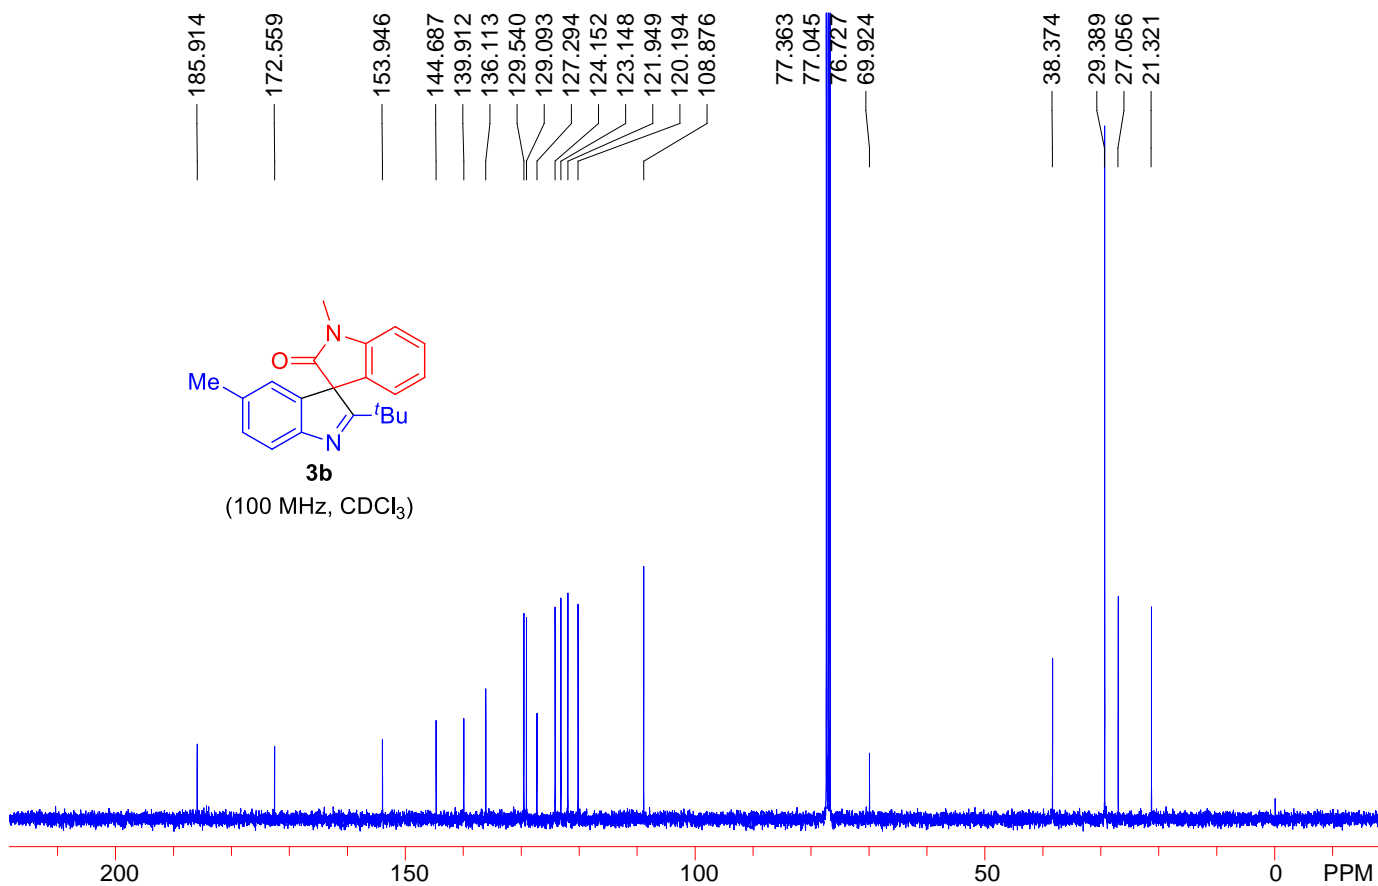

7.579  
7.559  
7.391  
7.388  
7.372  
7.369  
7.353  
7.350  
7.260  
7.217  
7.213  
7.197  
7.193  
7.012  
7.008  
6.995  
6.993  
6.988  
6.976  
6.782  
6.779  
6.770  
6.762  
6.761  
6.617  
6.614  
6.614  
3.357  
2.819  
2.802  
2.784  
2.767  
2.750  
1.147  
1.139  
1.130  
1.122

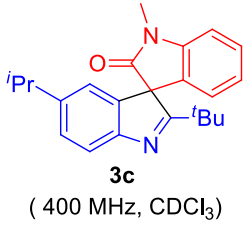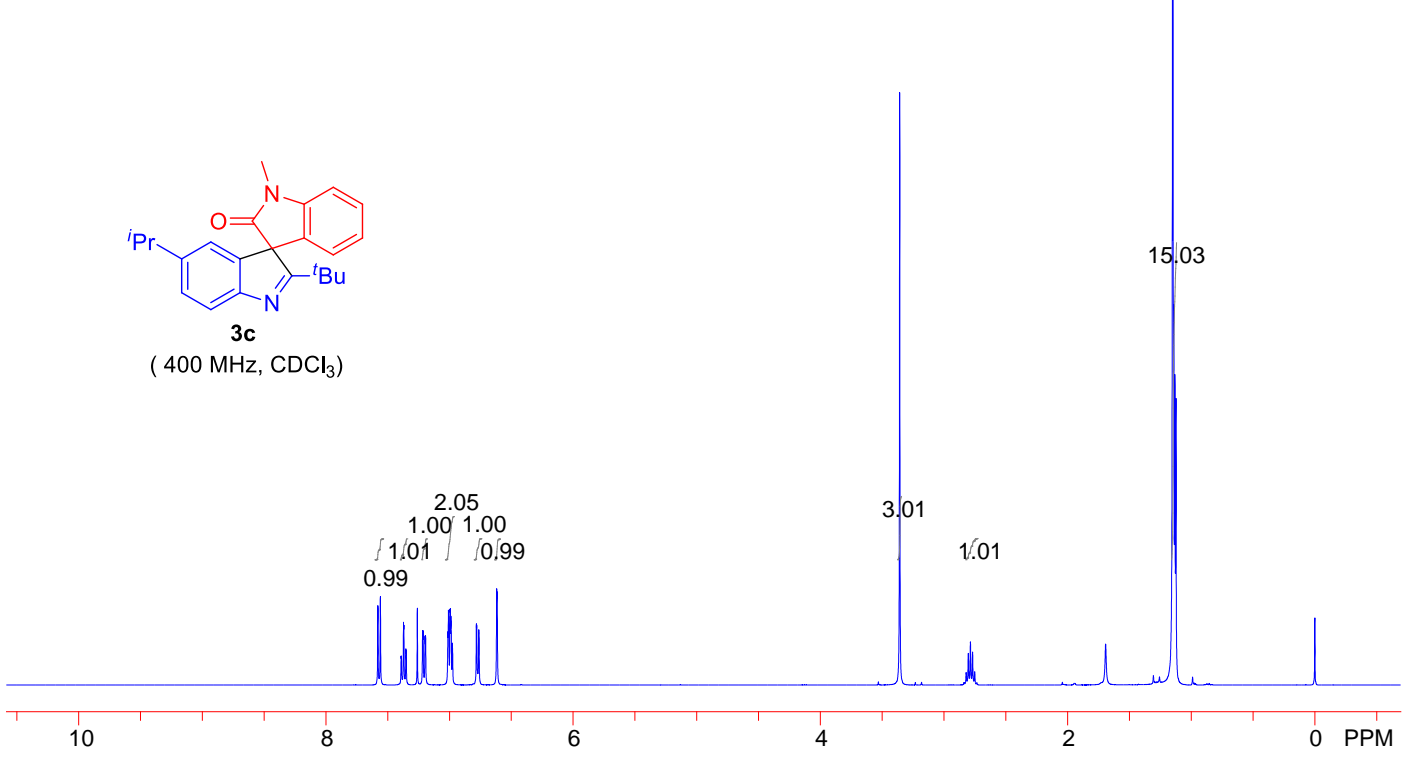

186.124  
172.588  
154.264  
147.294  
144.744  
139.818  
129.064  
127.337  
126.796  
124.196  
123.148  
120.252  
119.558  
108.854  
77.363  
77.045  
76.727  
70.046  
38.389  
34.106  
29.397  
27.107  
24.160  
24.117

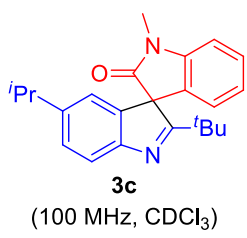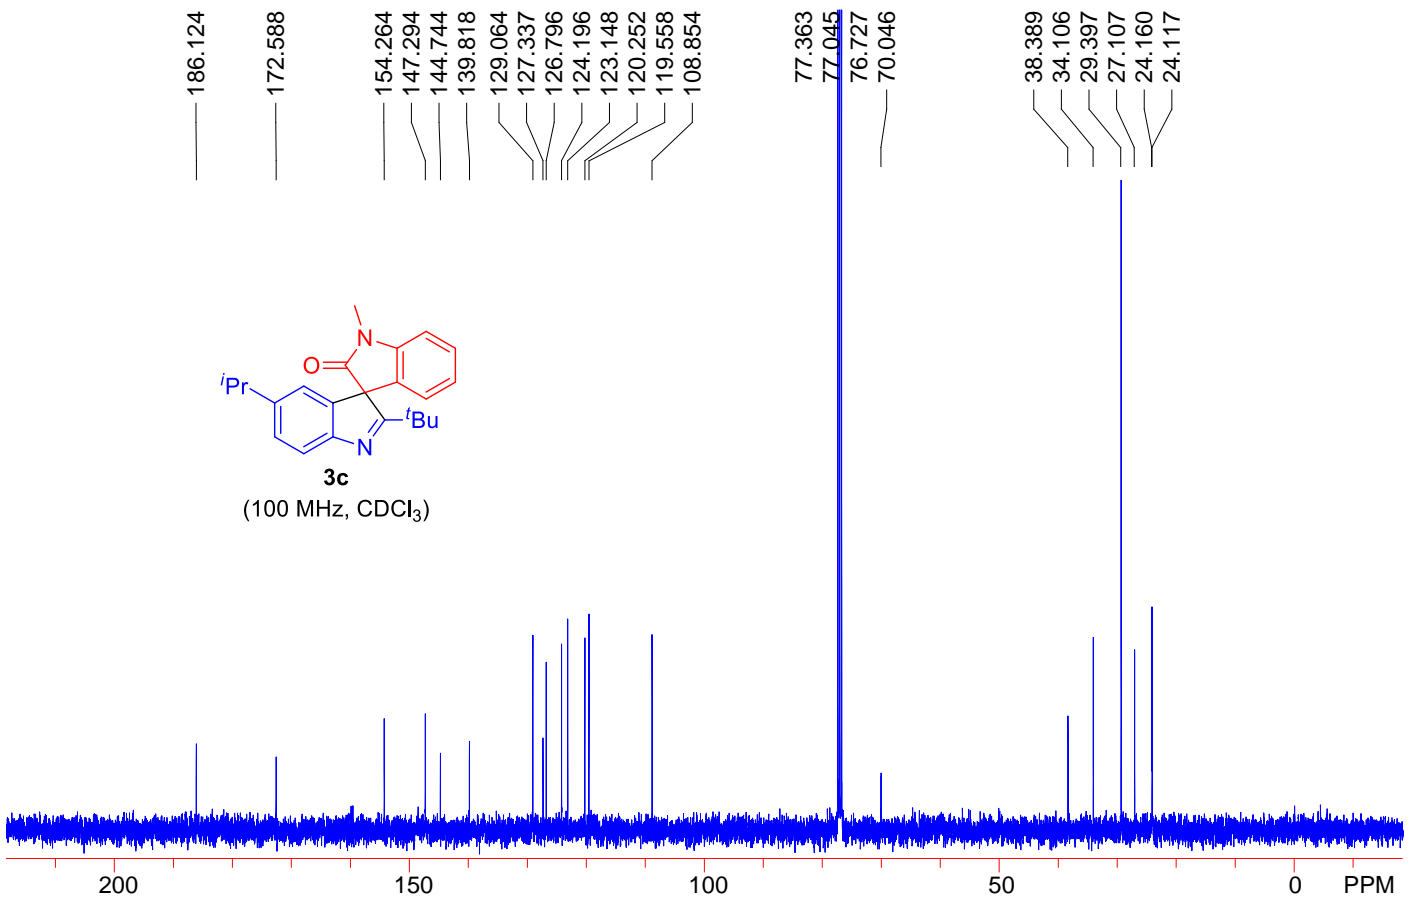

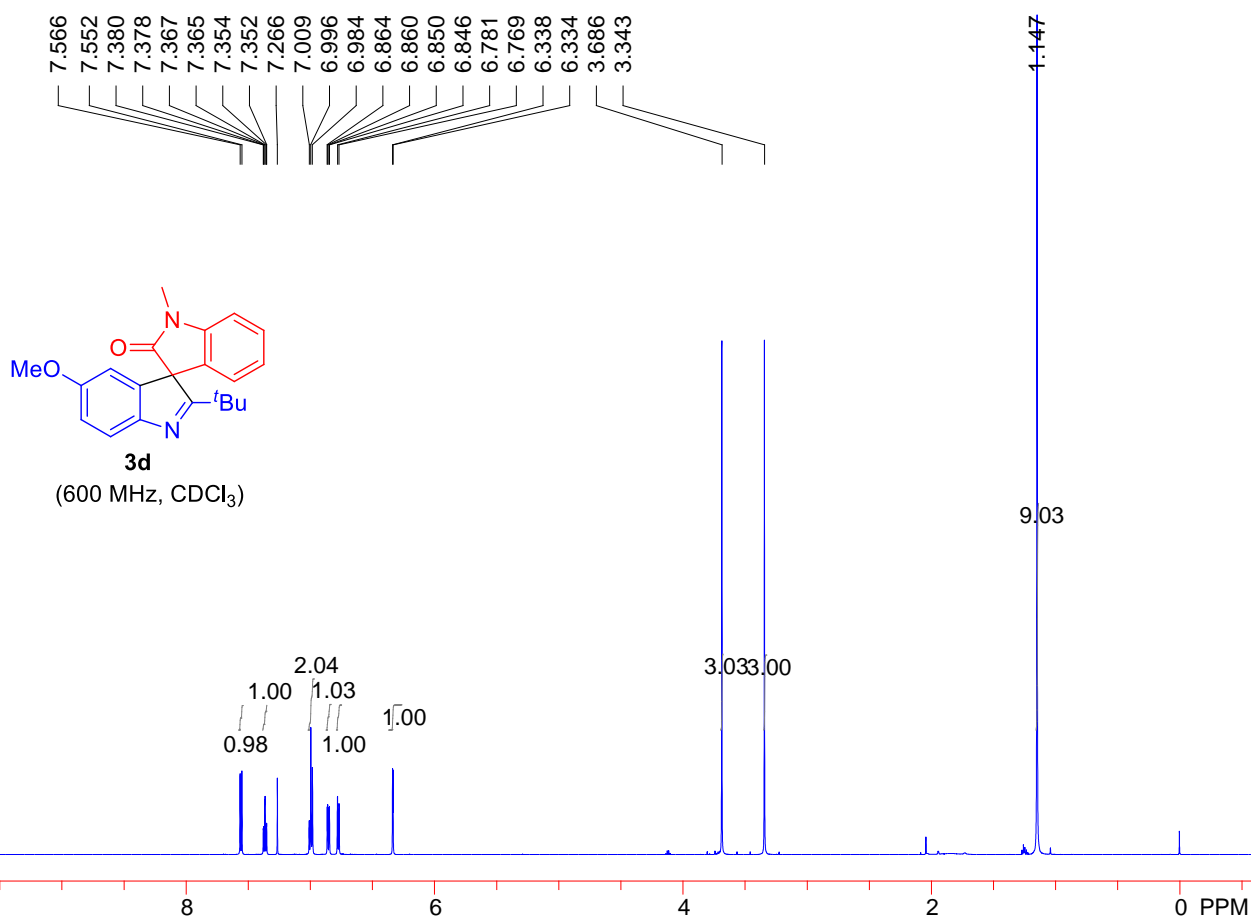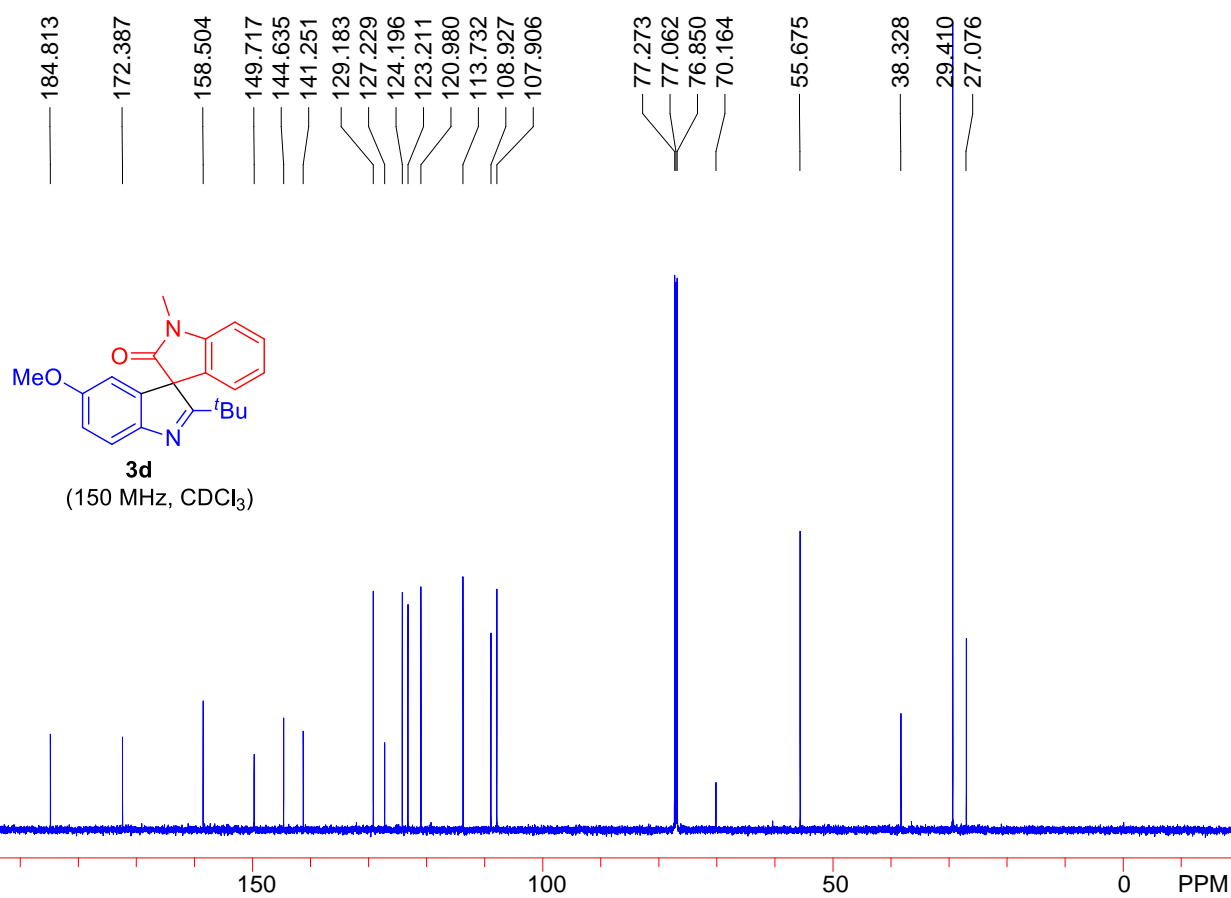

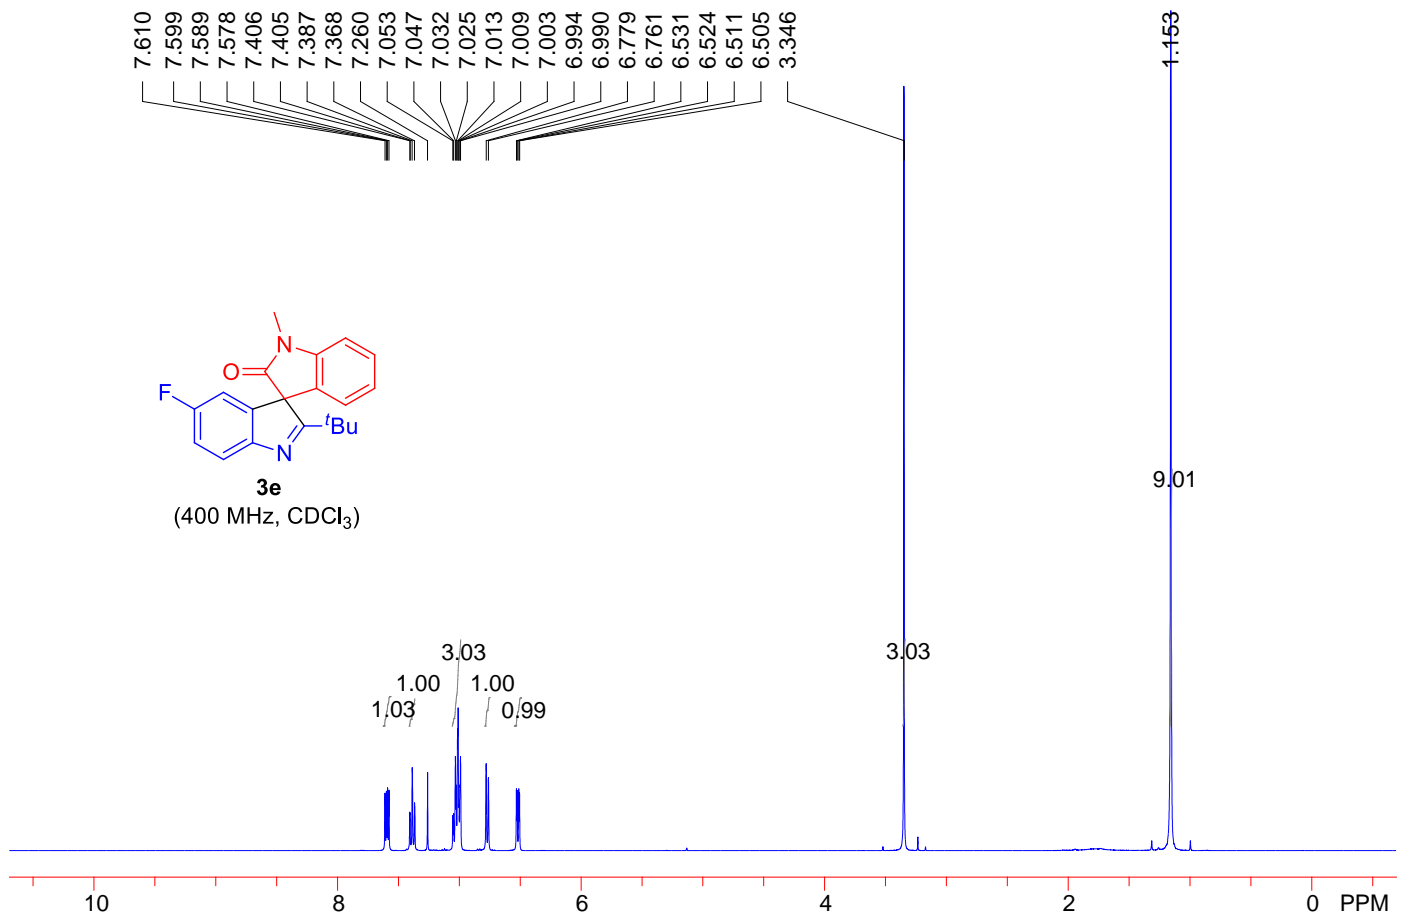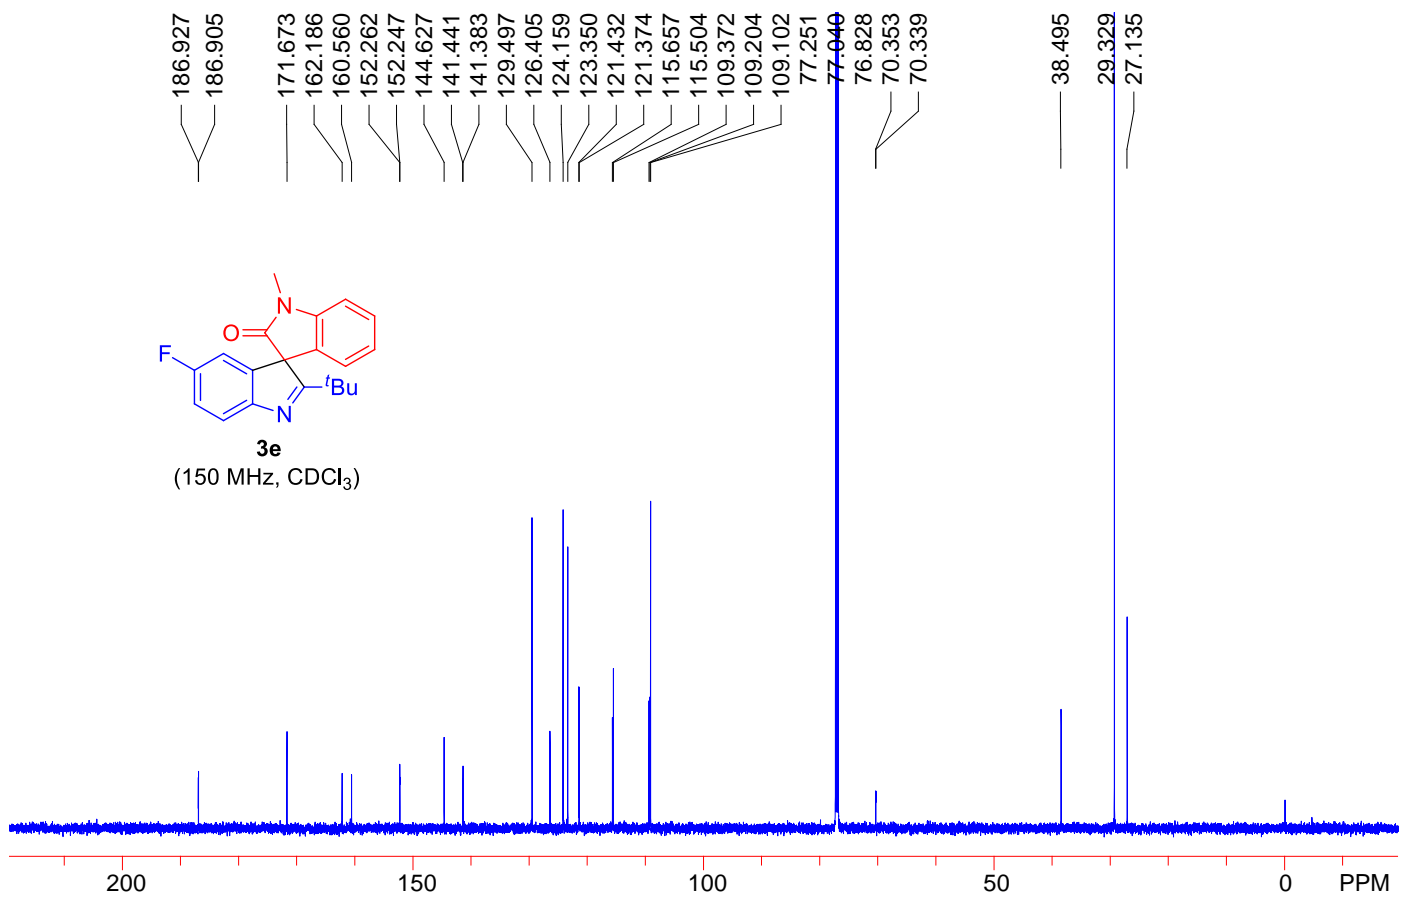

115.690  
115.701  
115.712  
115.723  
115.734  
115.745

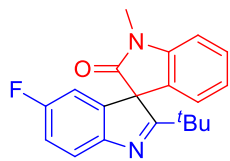

**3e**  
(376 MHz, CDCl<sub>3</sub>)

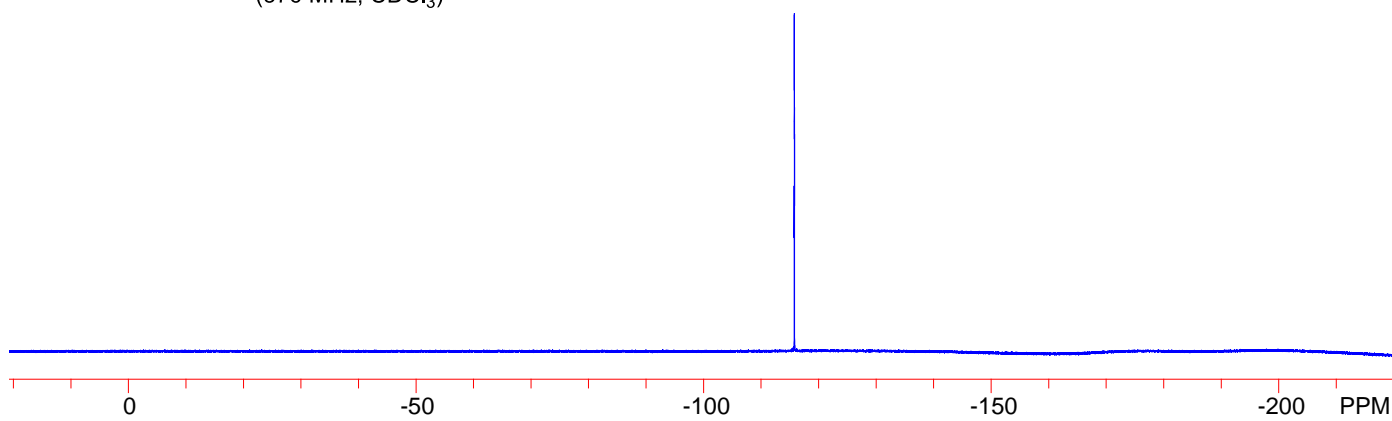

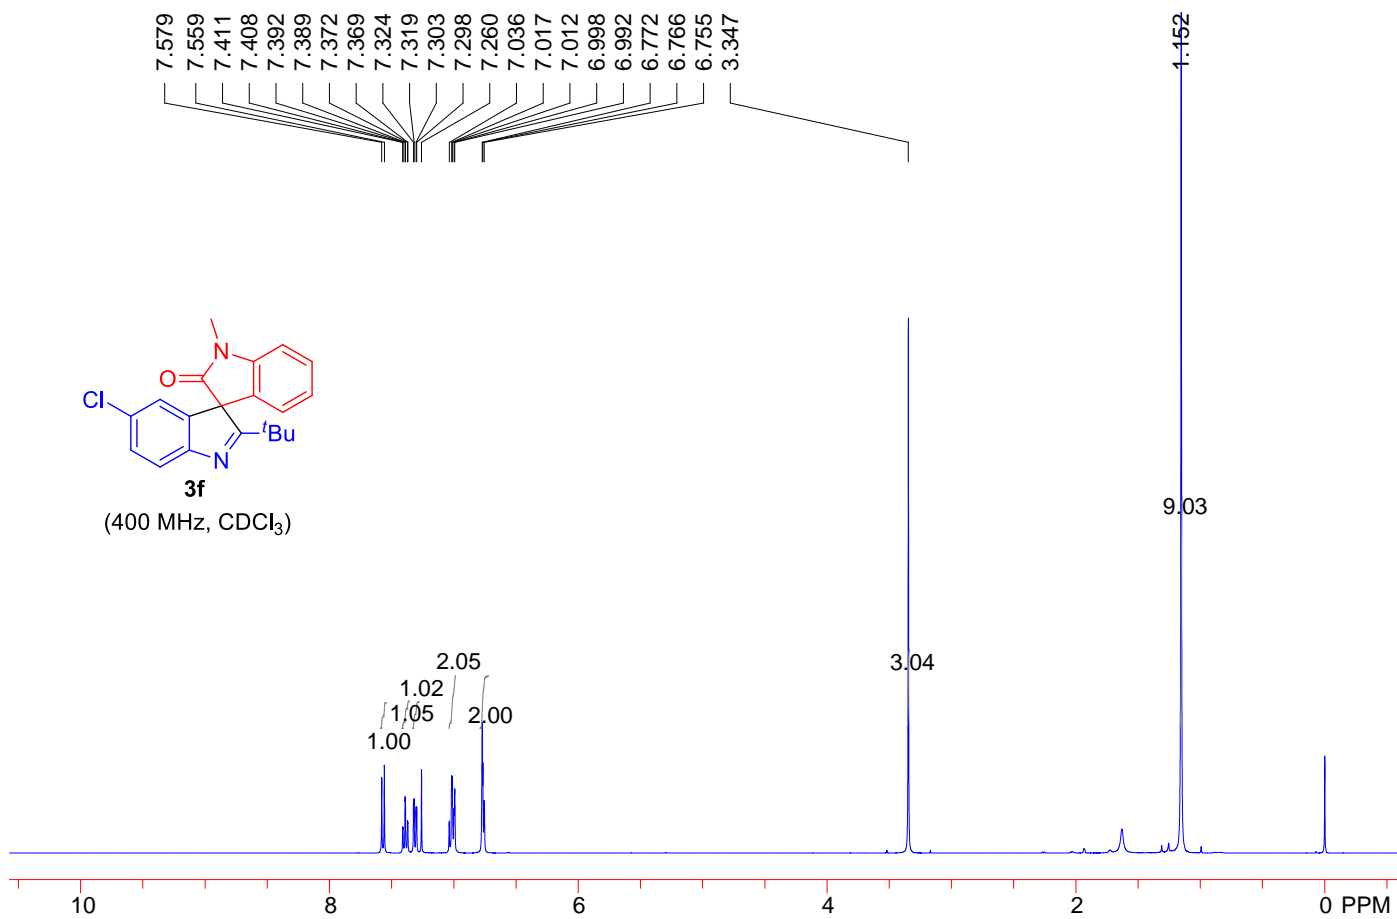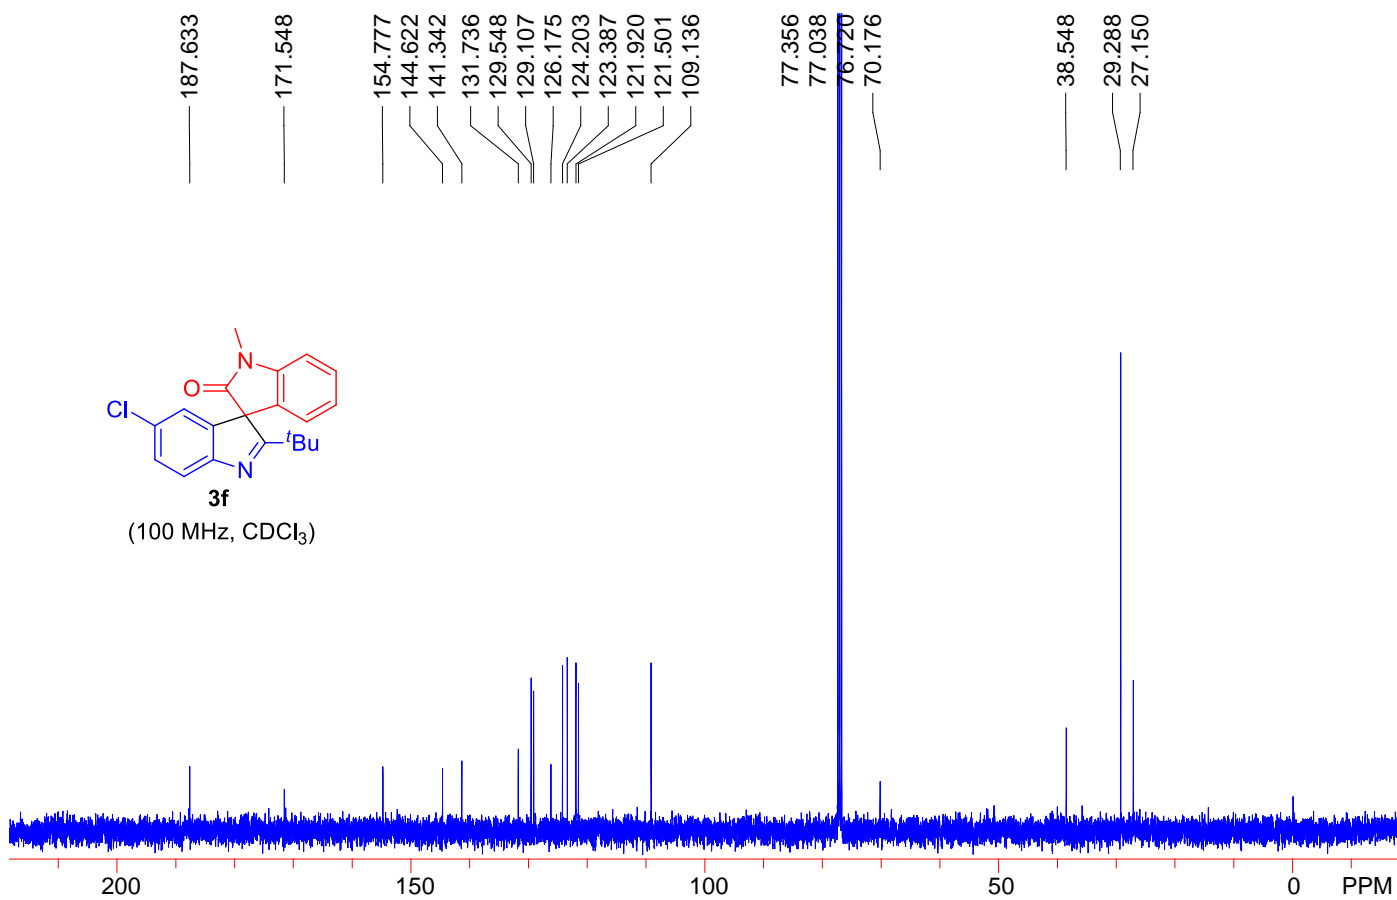

7.529  
7.508  
7.476  
7.471  
7.455  
7.451  
7.411  
7.408  
7.391  
7.389  
7.372  
7.370  
7.260  
7.036  
7.017  
7.011  
6.998  
6.991  
6.914  
6.910  
6.772  
6.754  
3.346

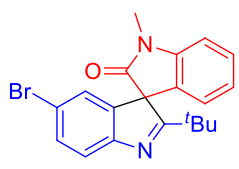

**3g**  
(400 MHz, CDCl<sub>3</sub>)

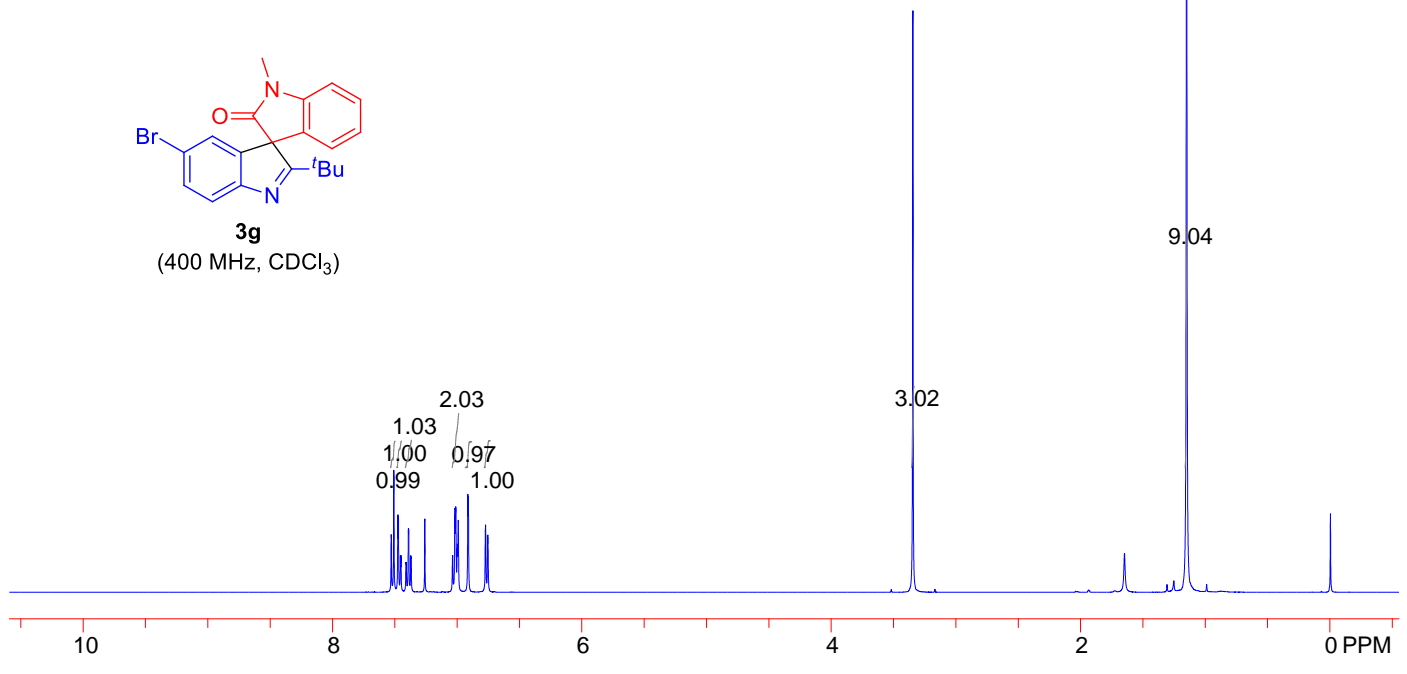

187.677  
171.505  
155.225  
144.622  
141.675  
132.025  
129.562  
126.110  
124.744  
124.224  
123.401  
121.971  
119.537  
109.150

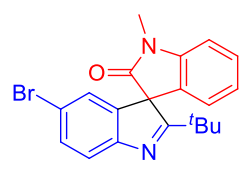

**3g**  
(100 MHz, CDCl<sub>3</sub>)

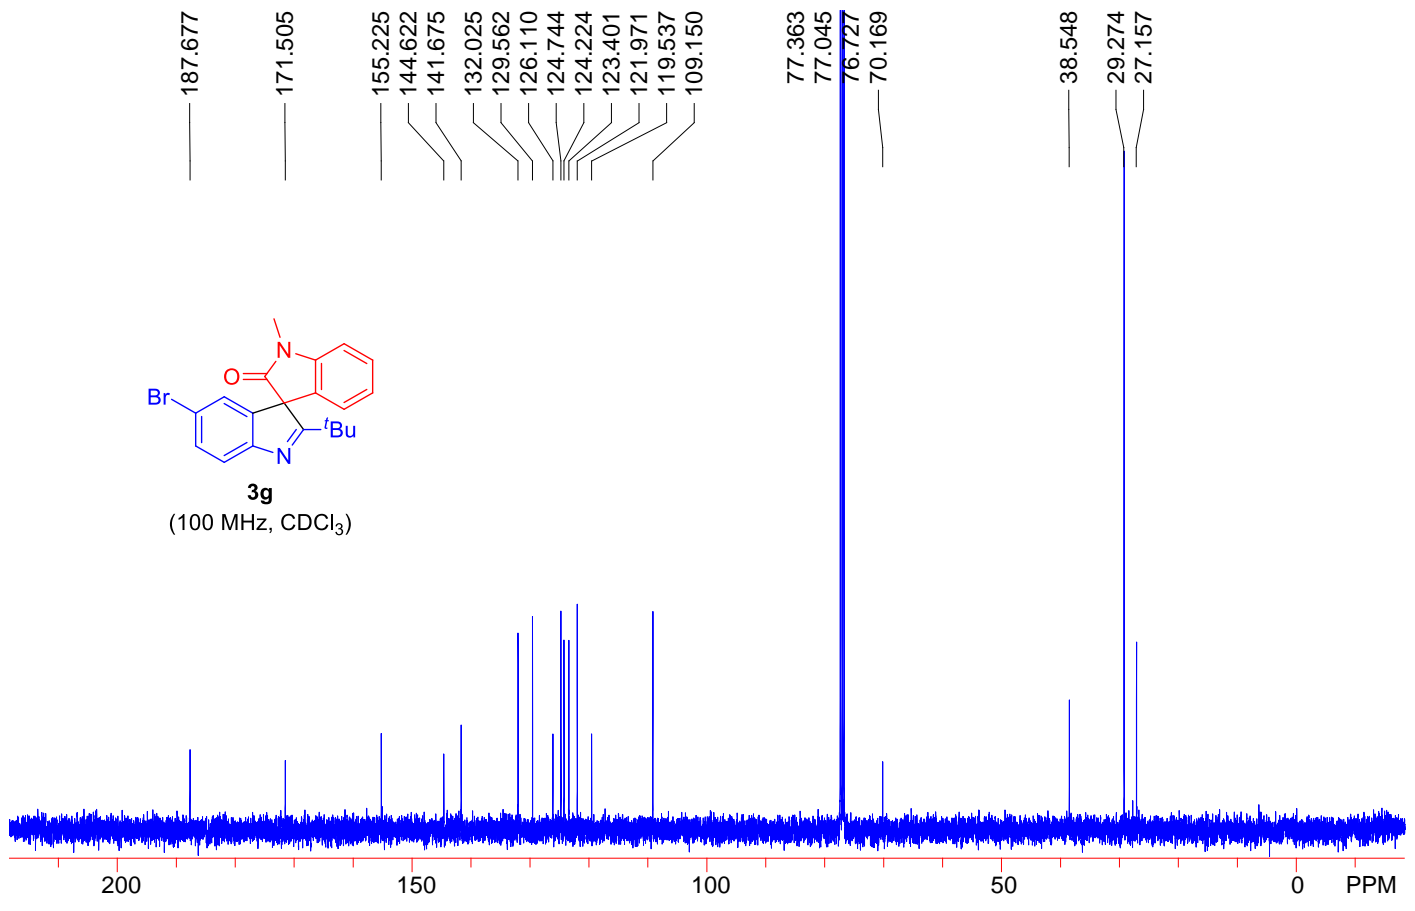



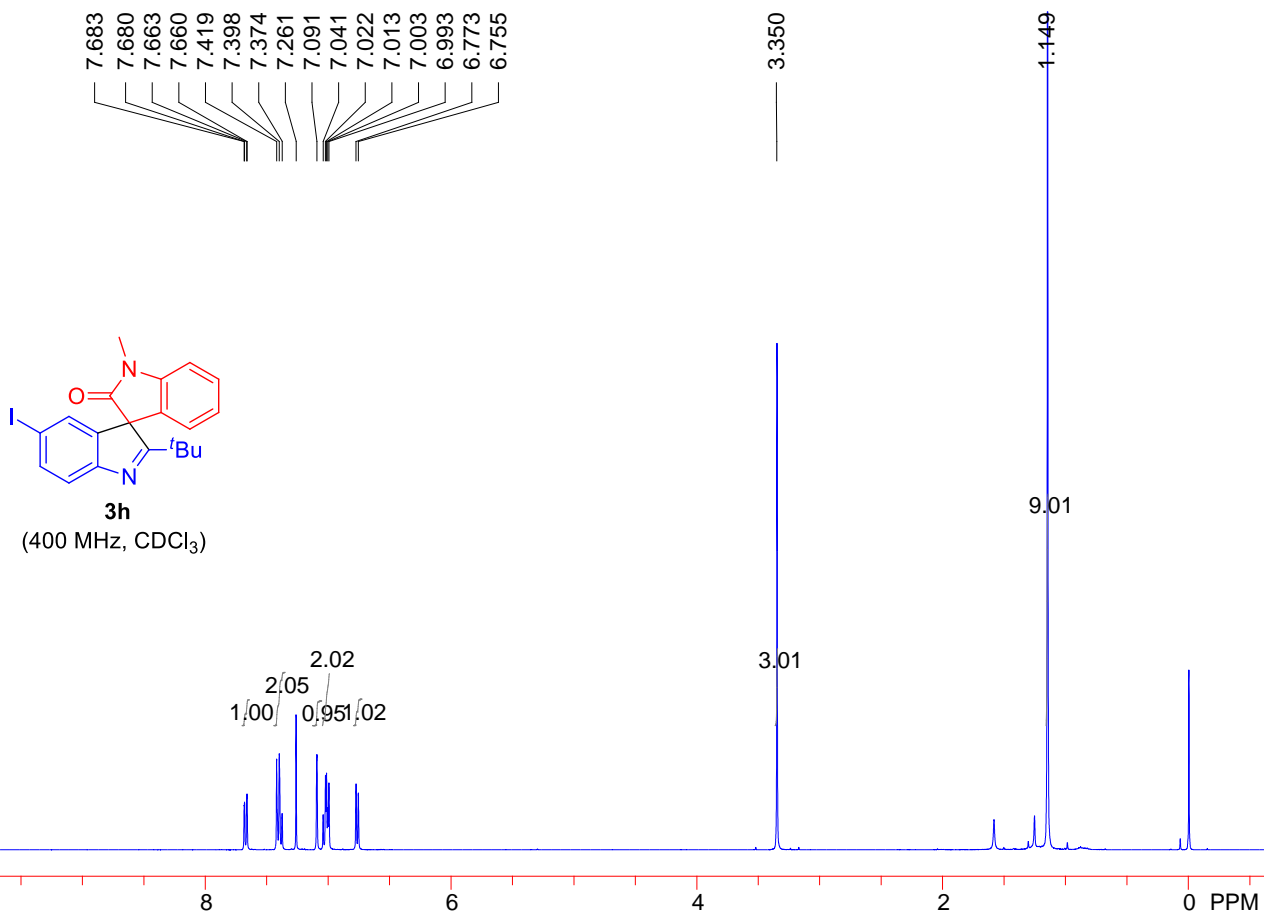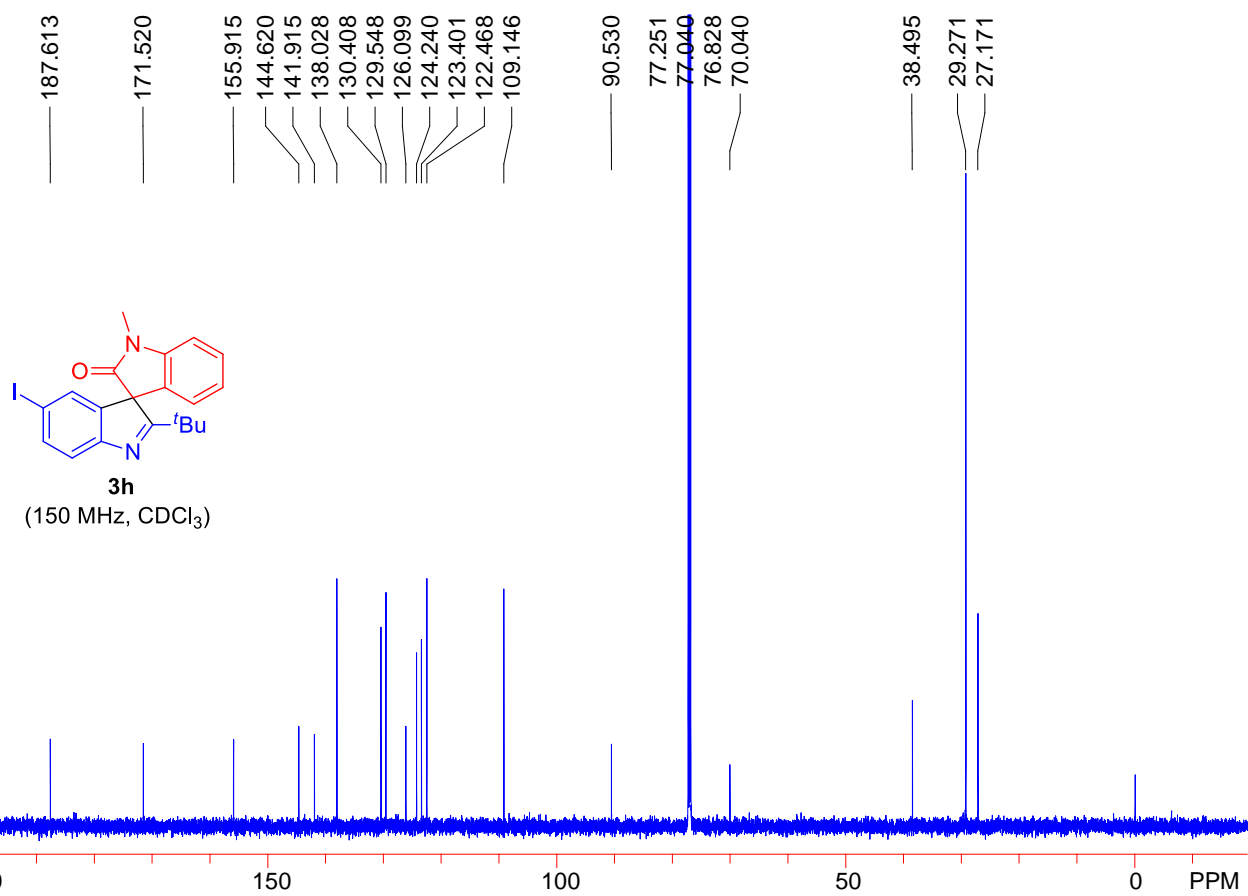

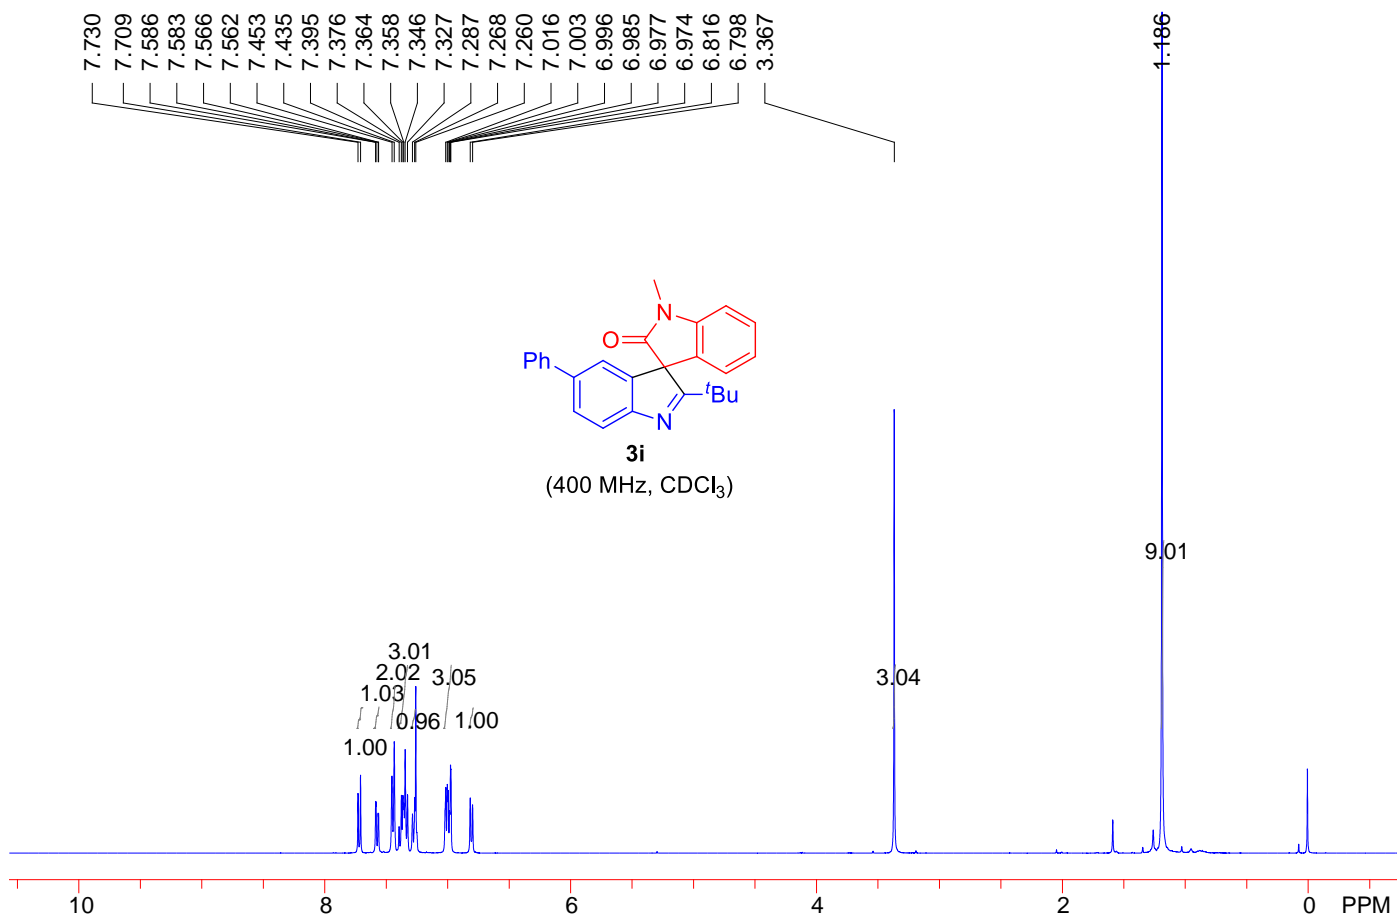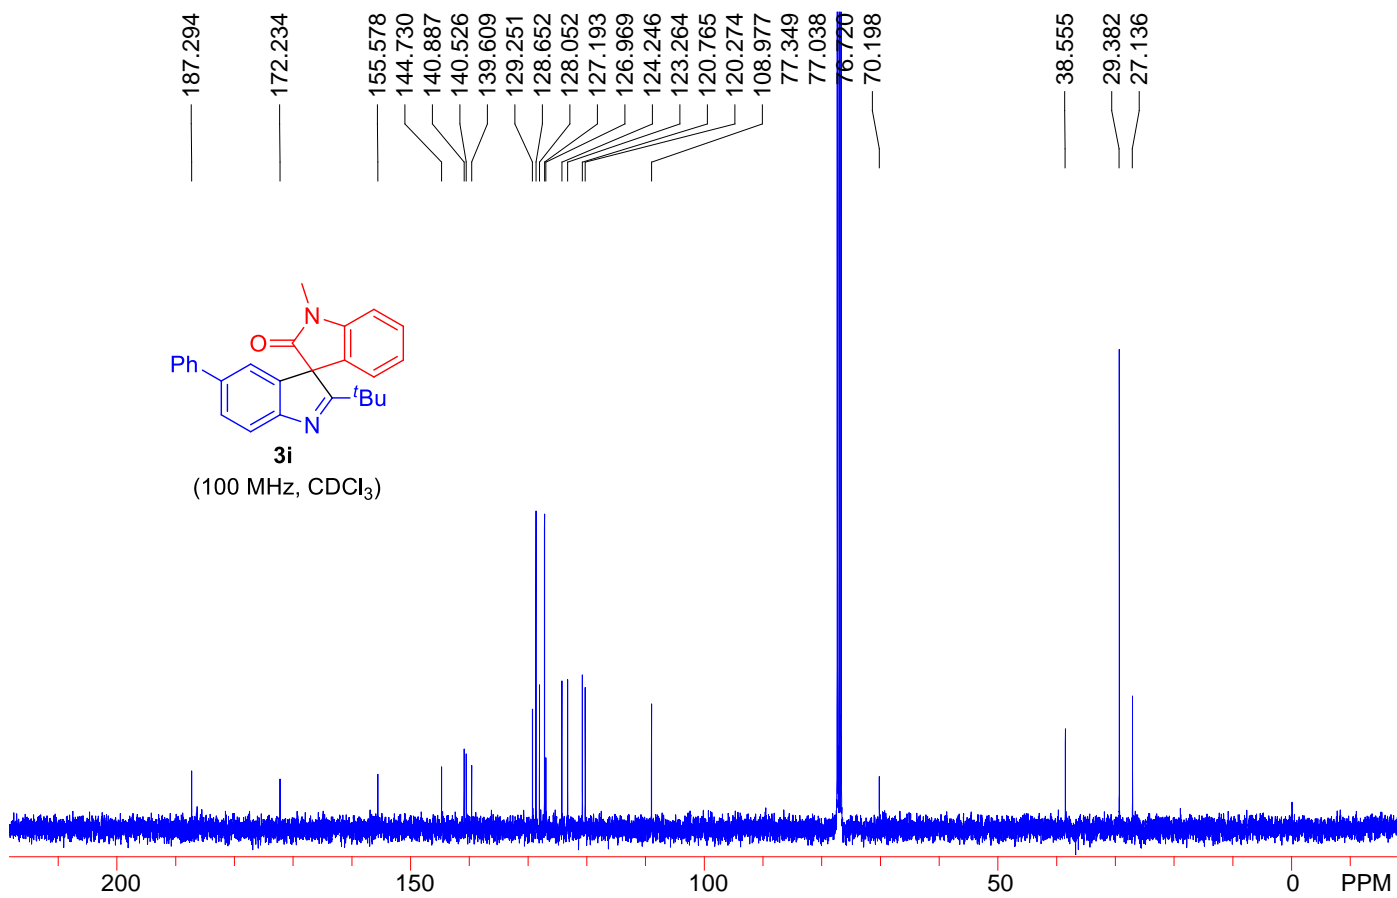

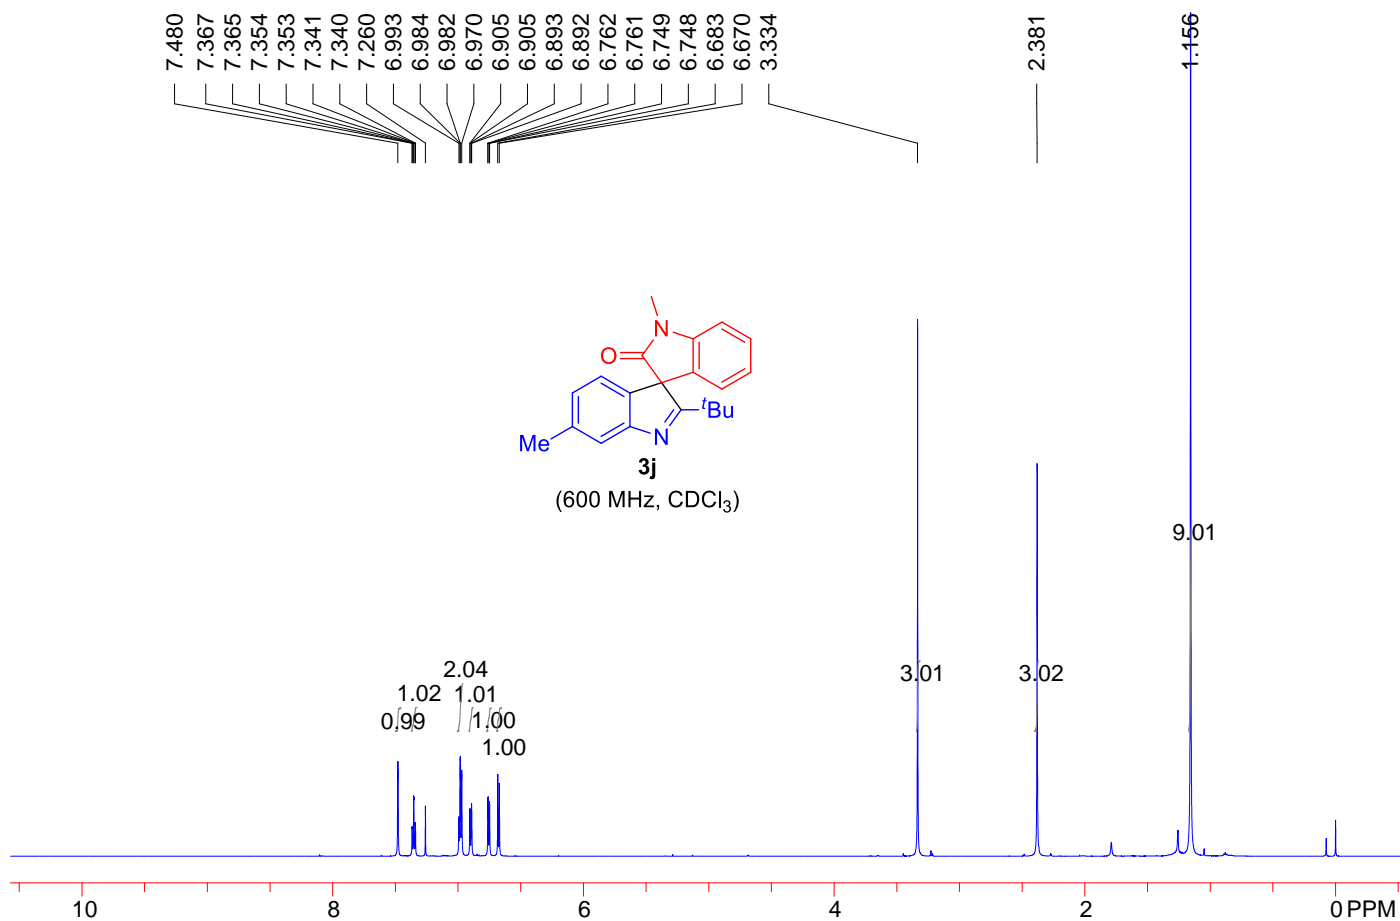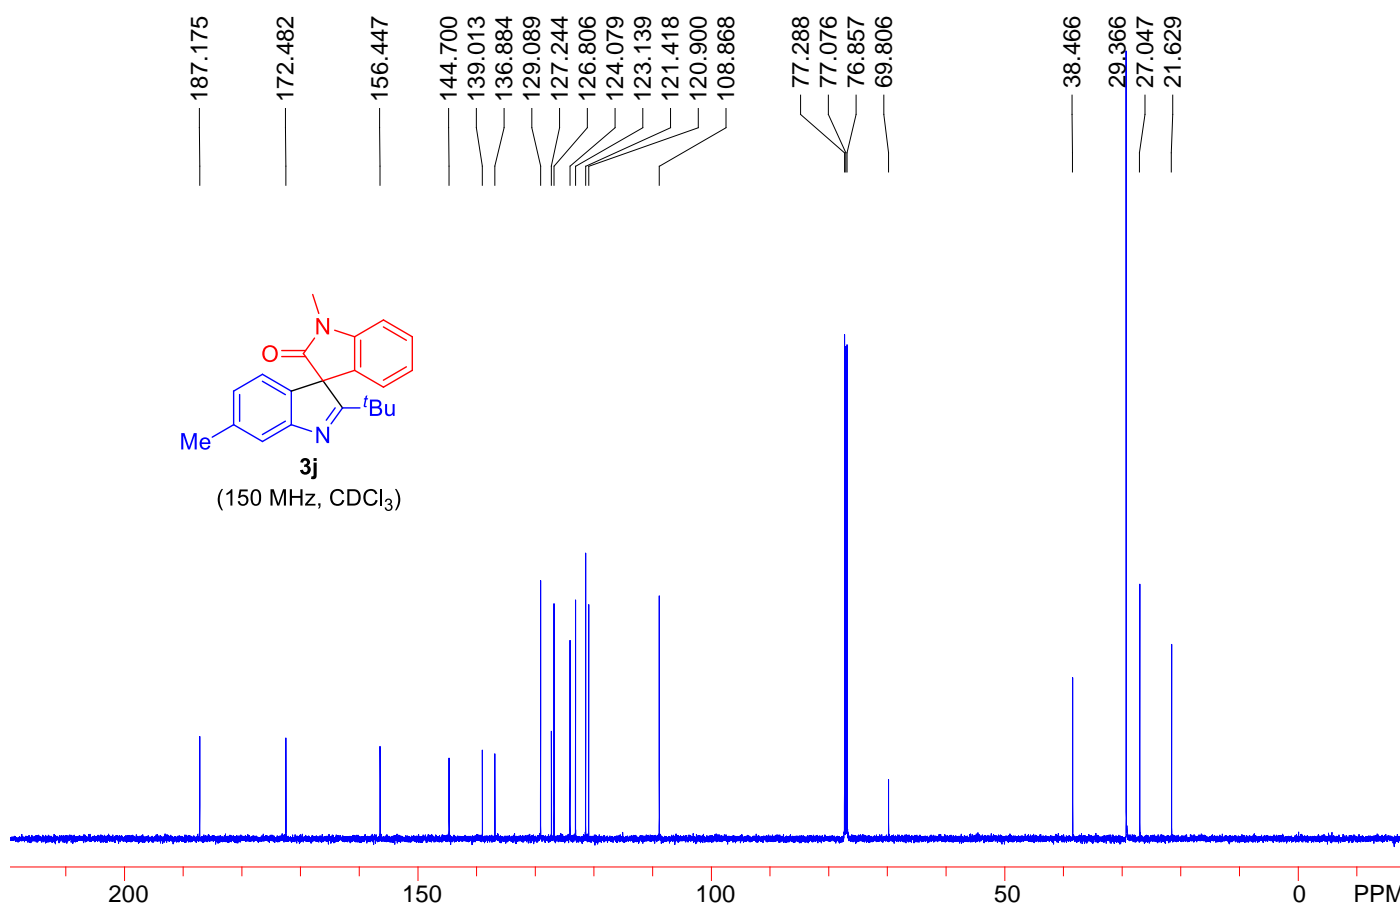

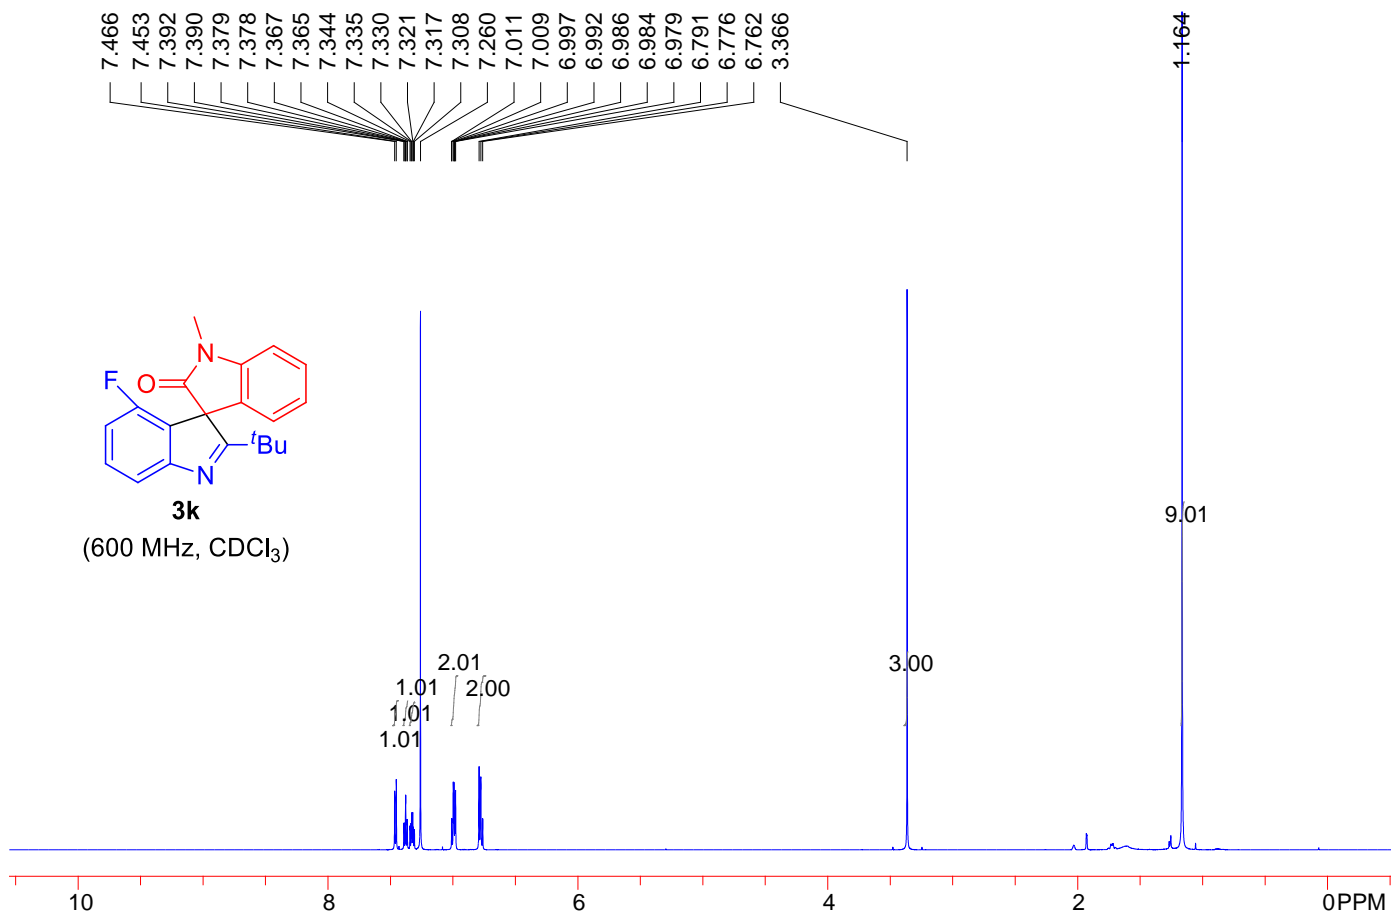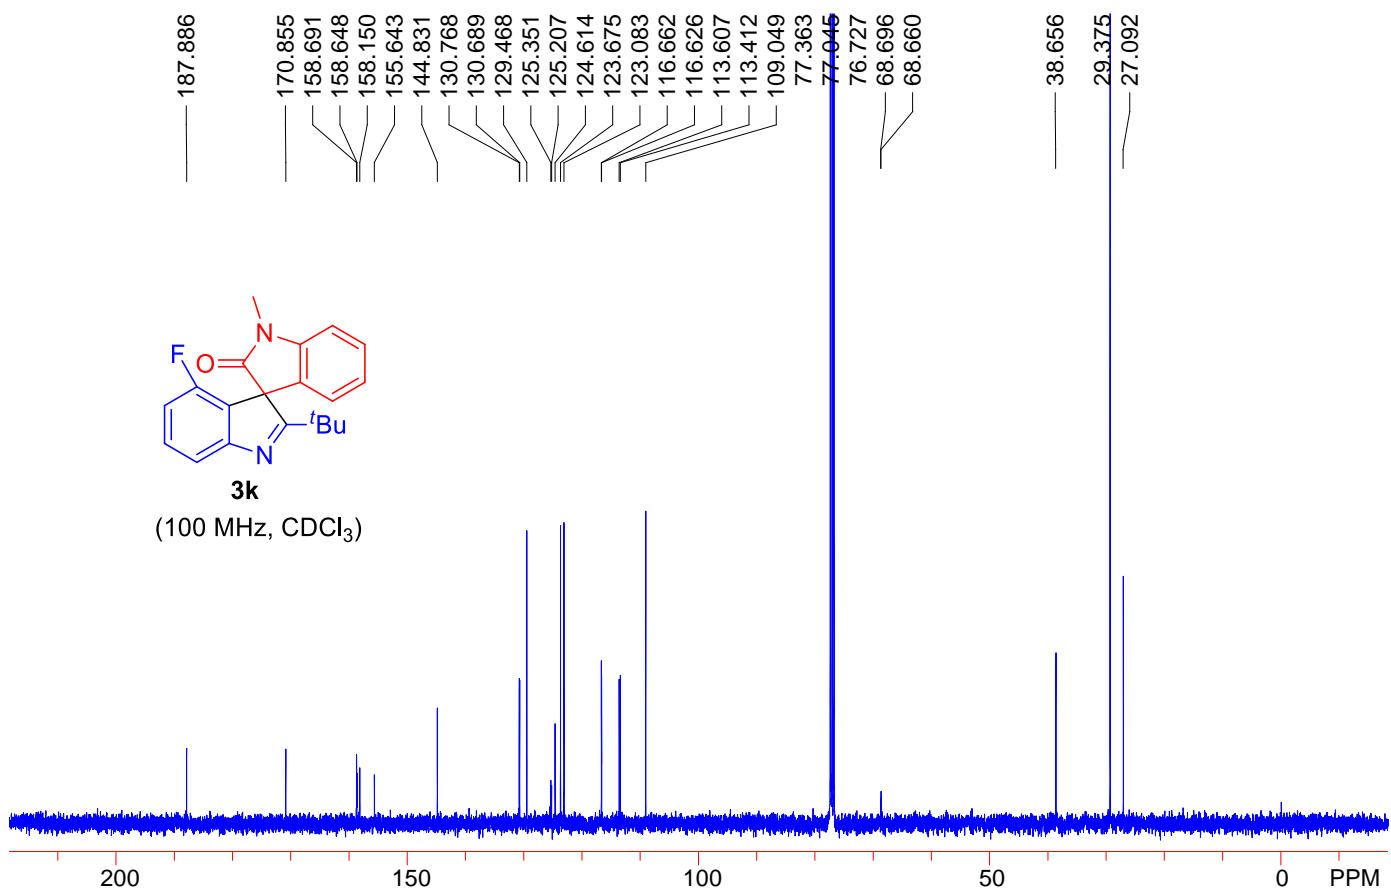

120.070  
120.085  
120.092  
120.107

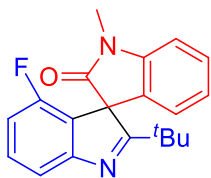

**3k**

(376 MHz, CDCl<sub>3</sub>)

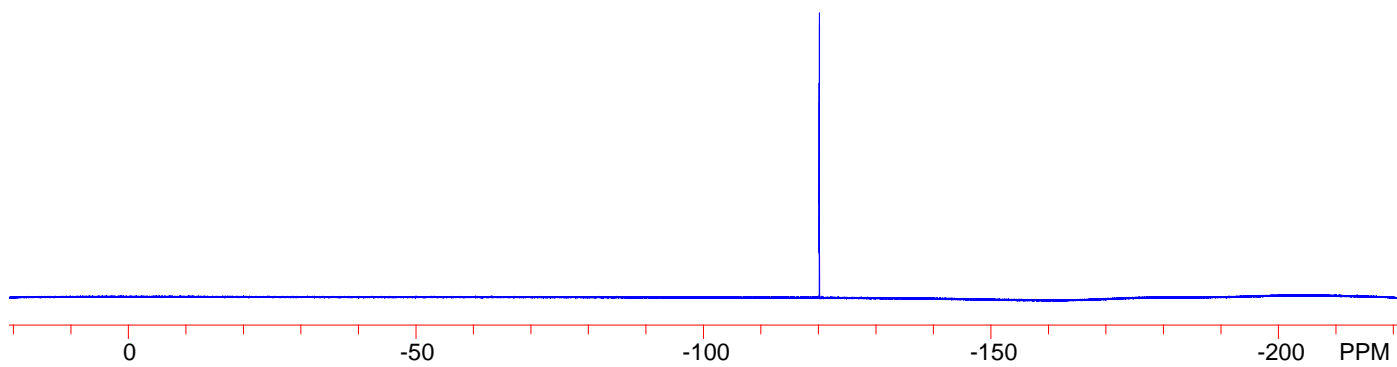

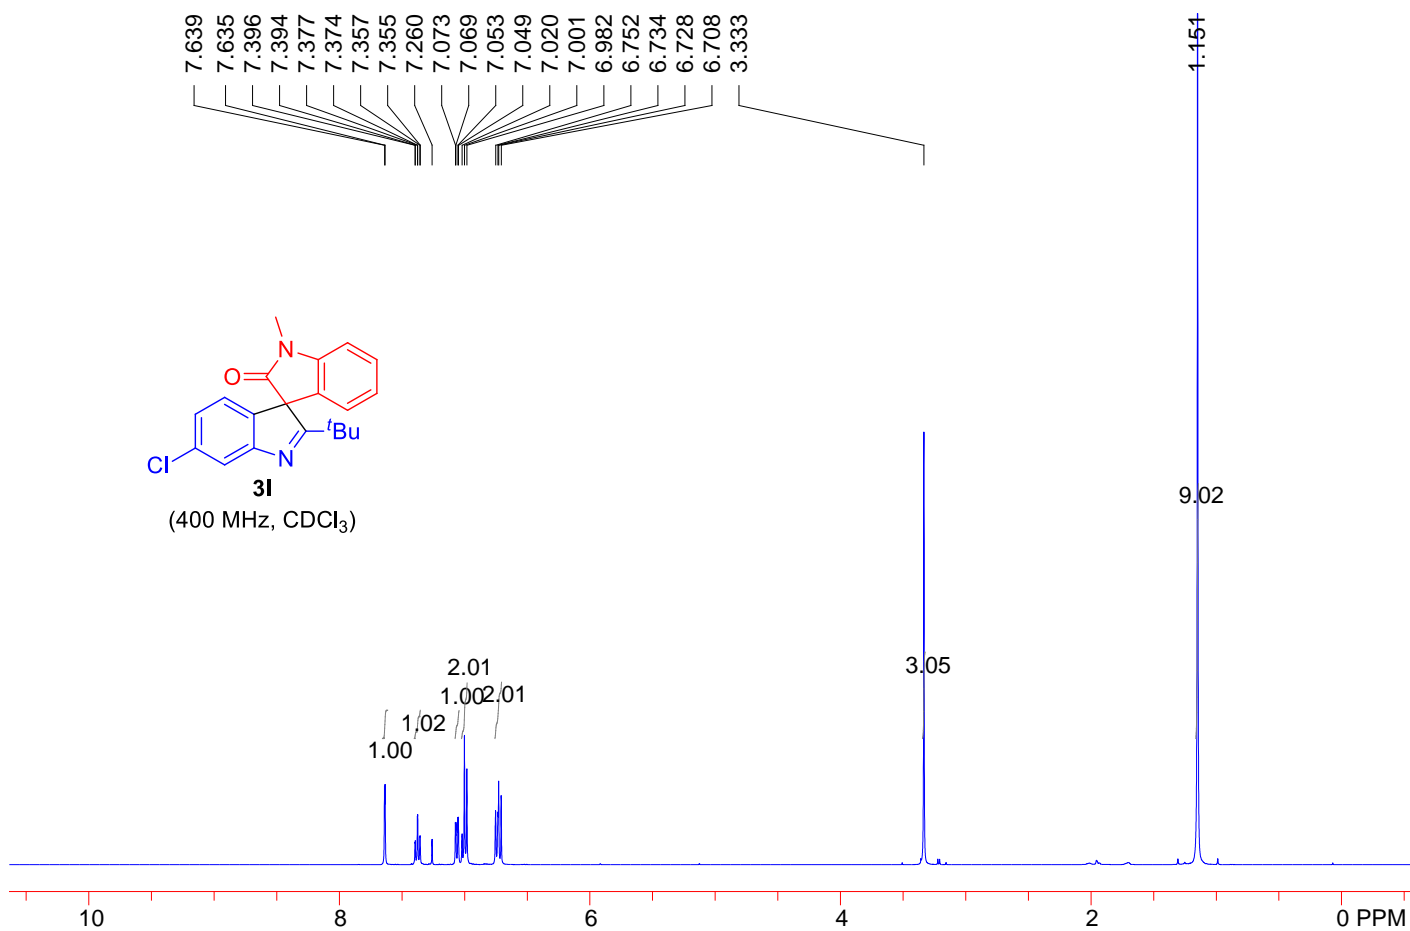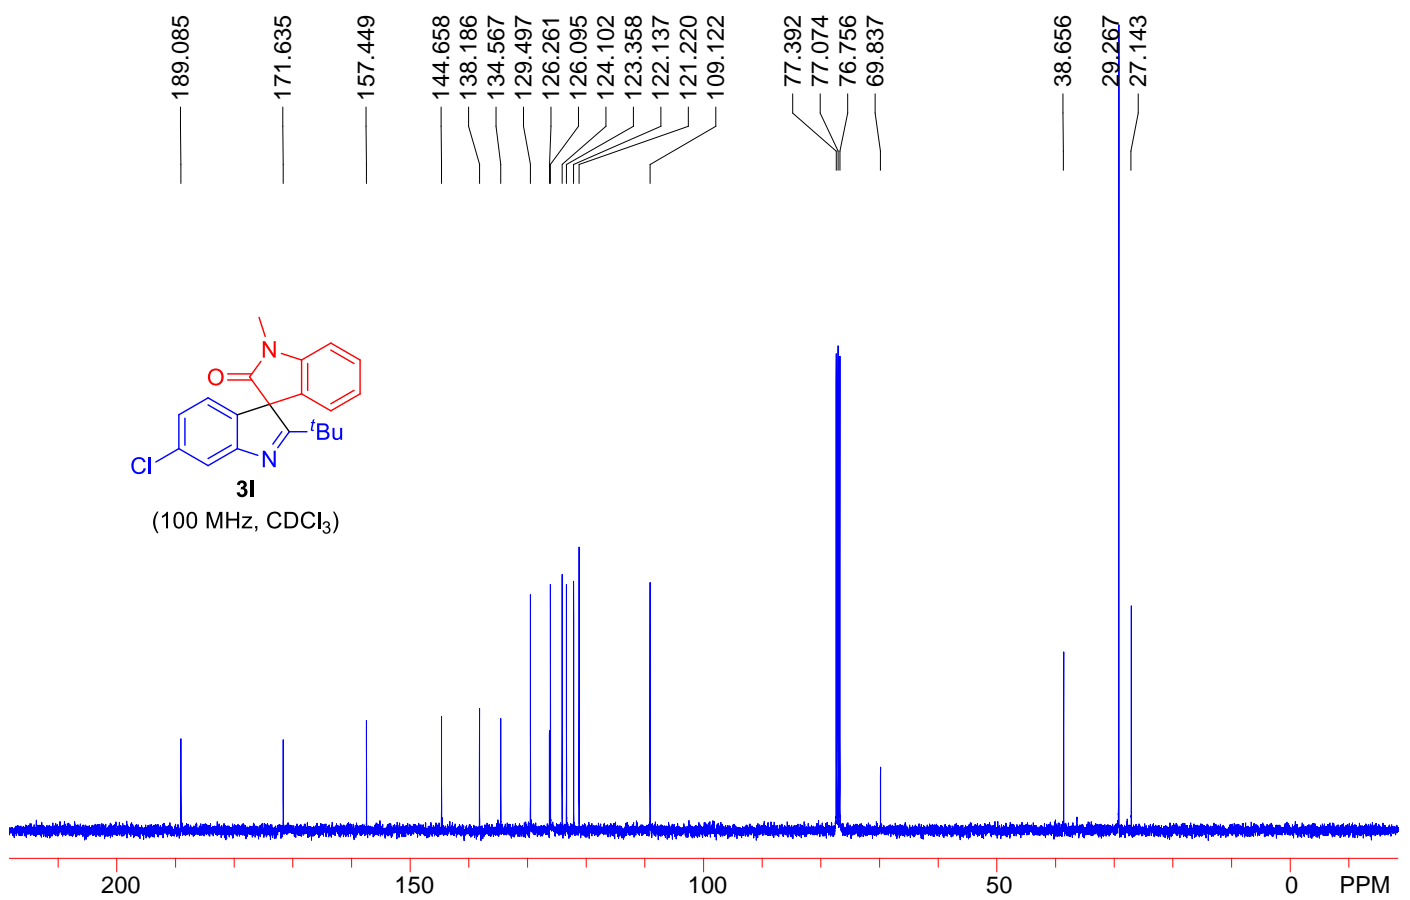

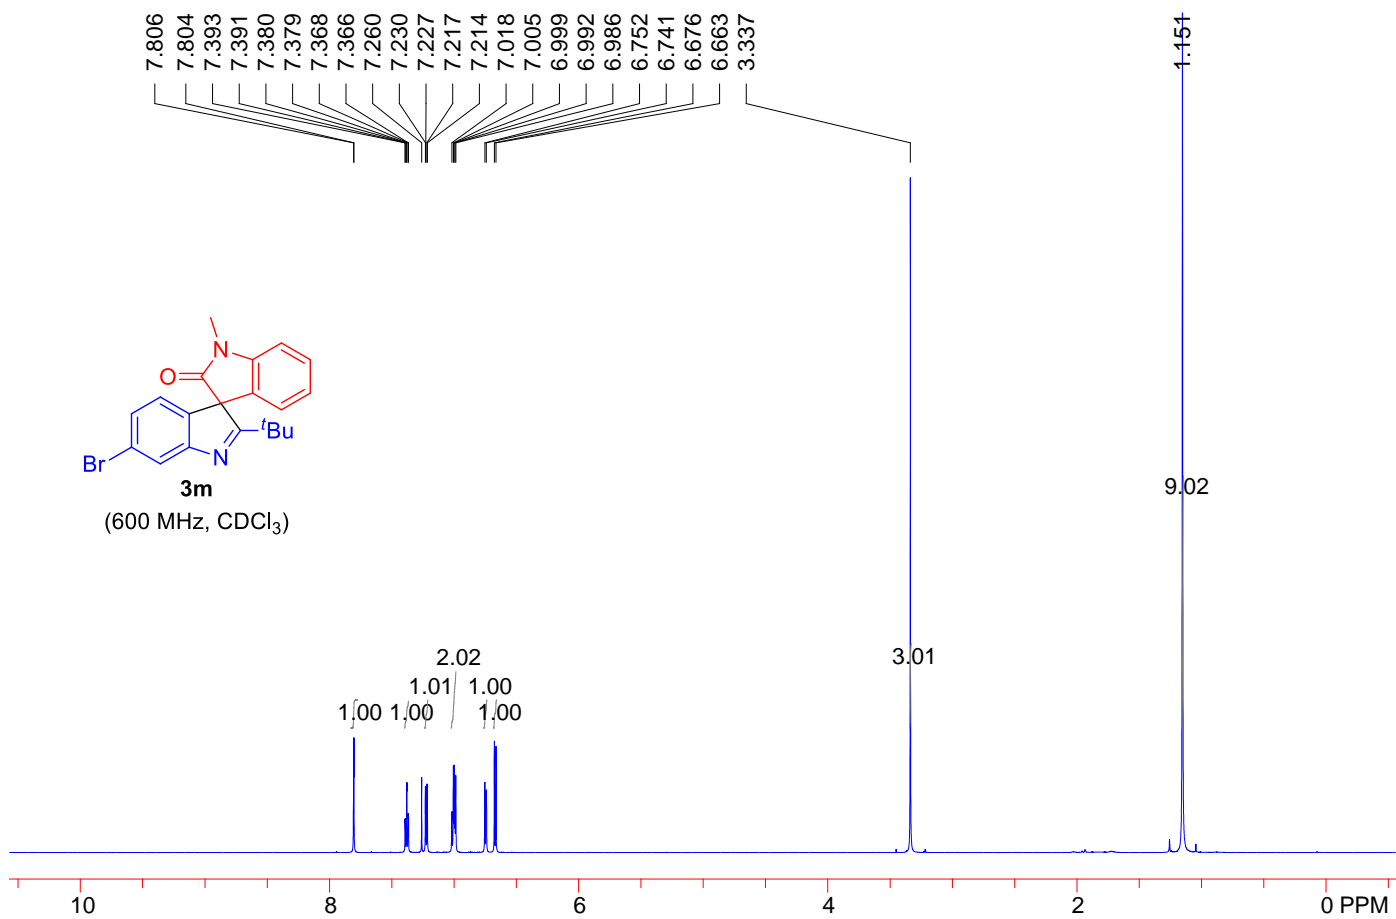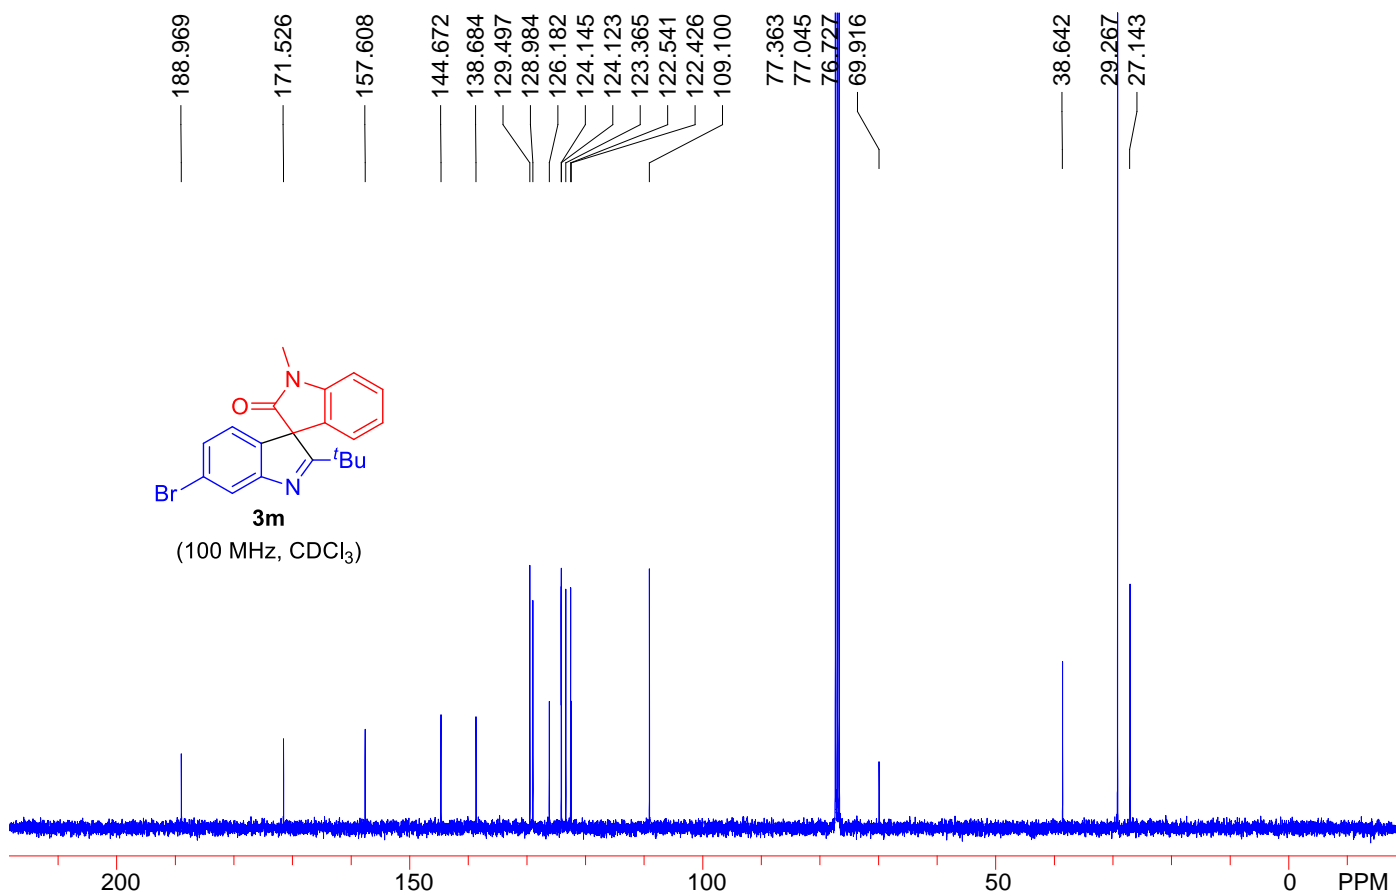

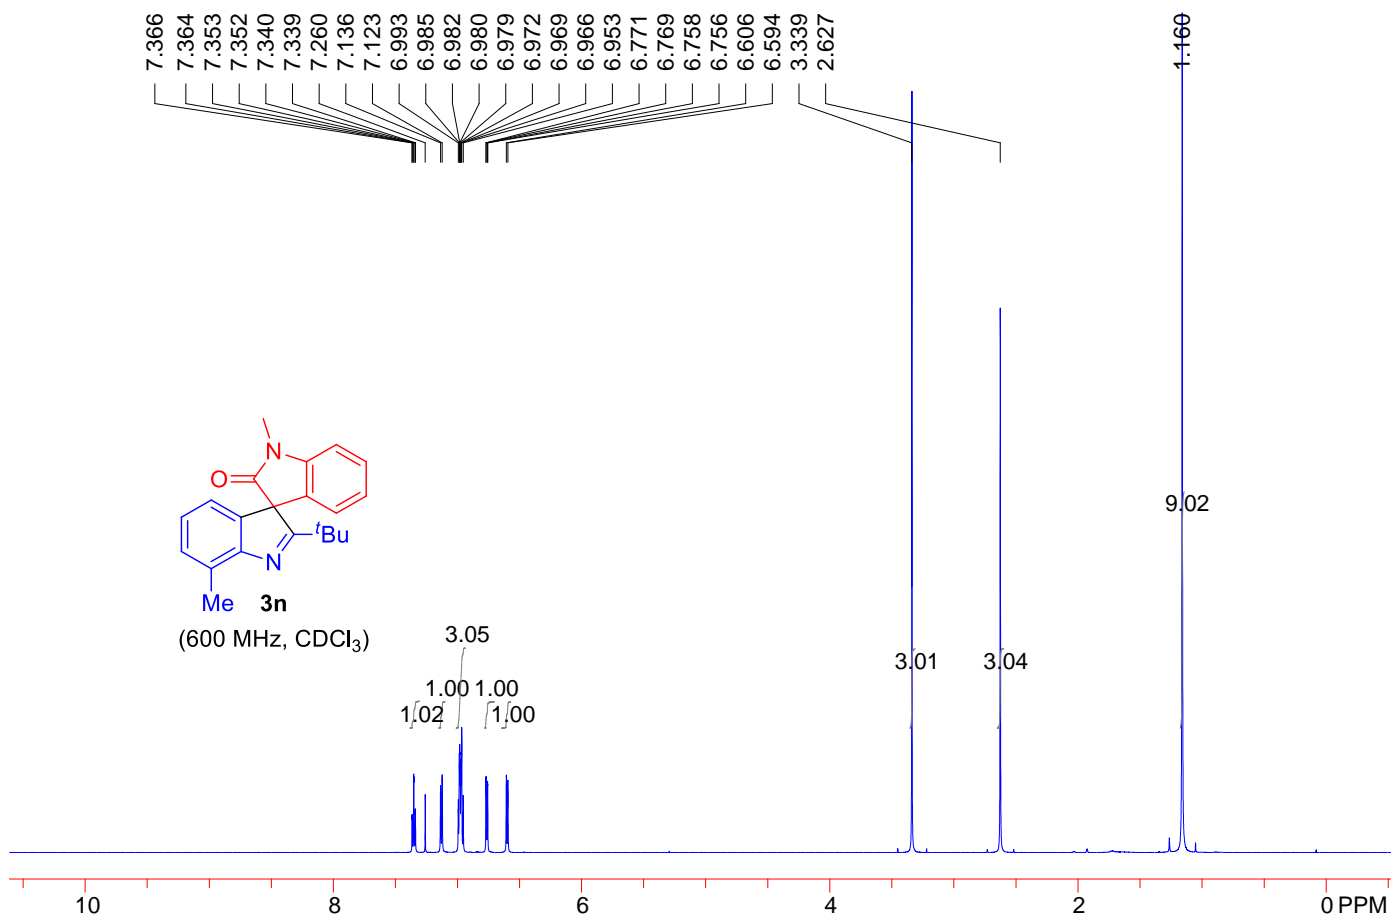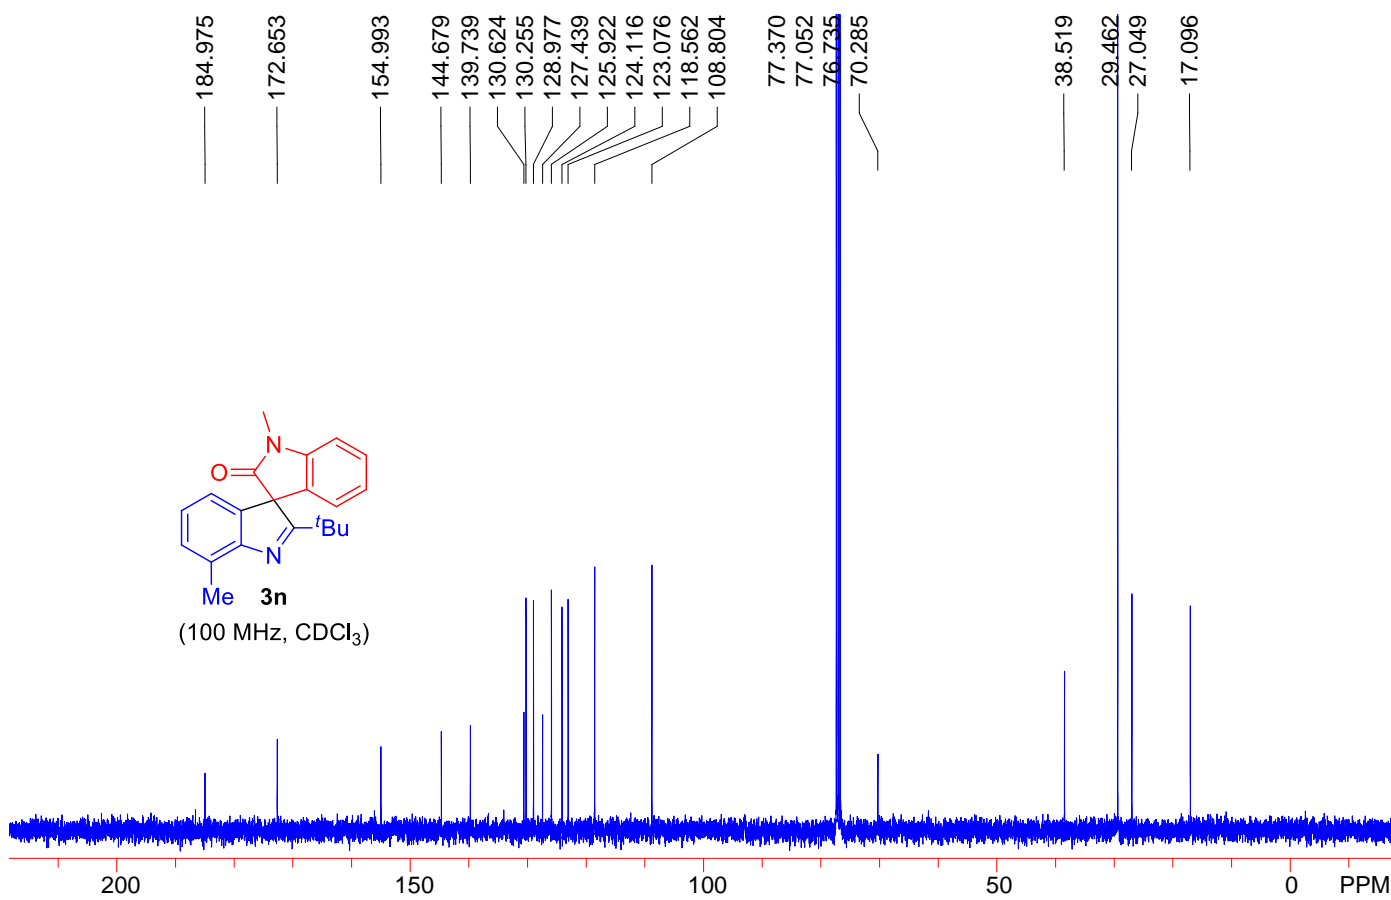



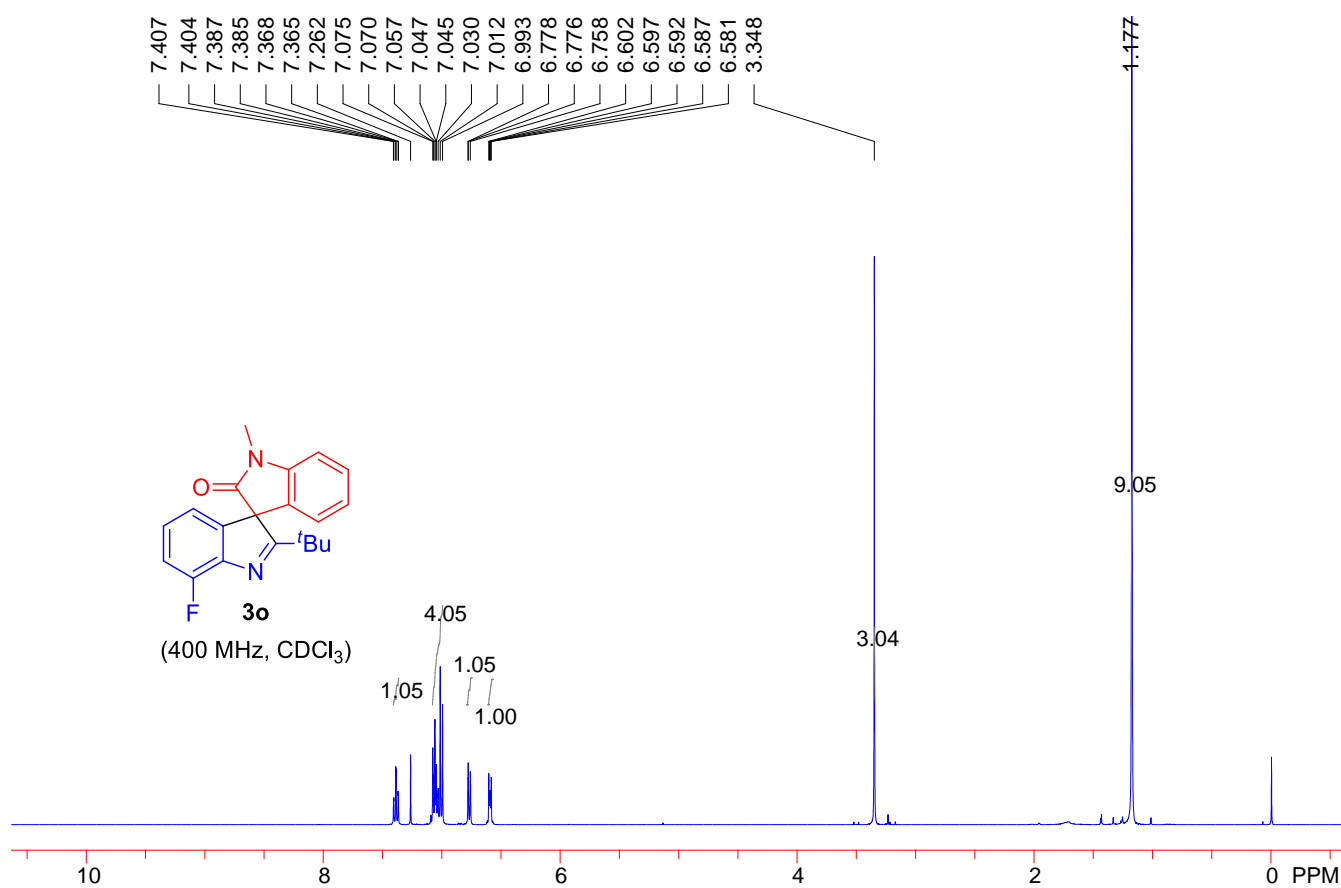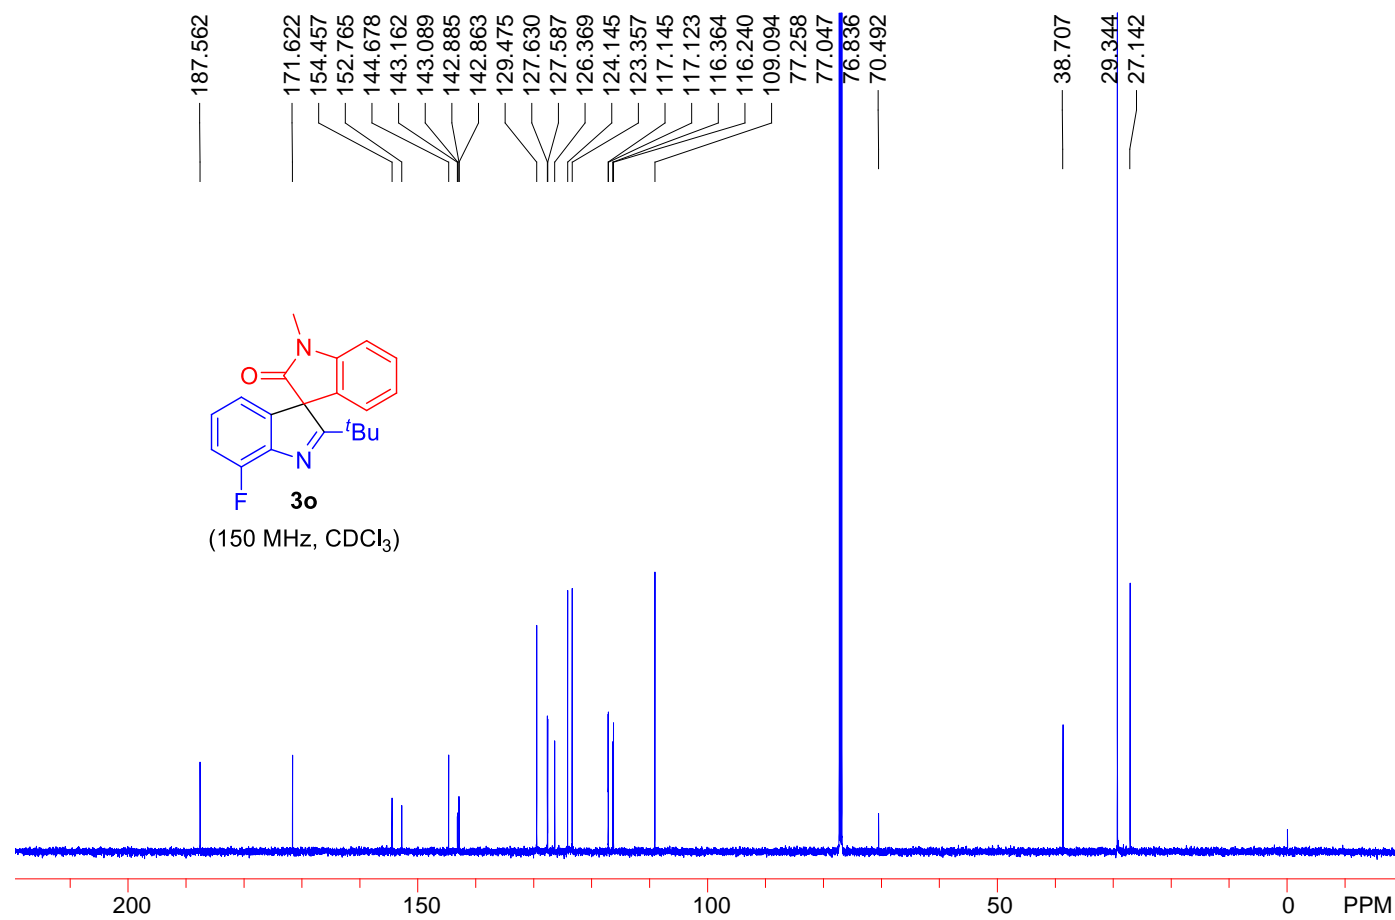

125.191  
125.209  
125.228

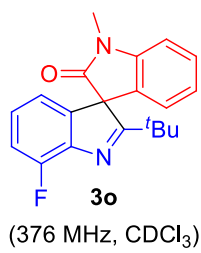

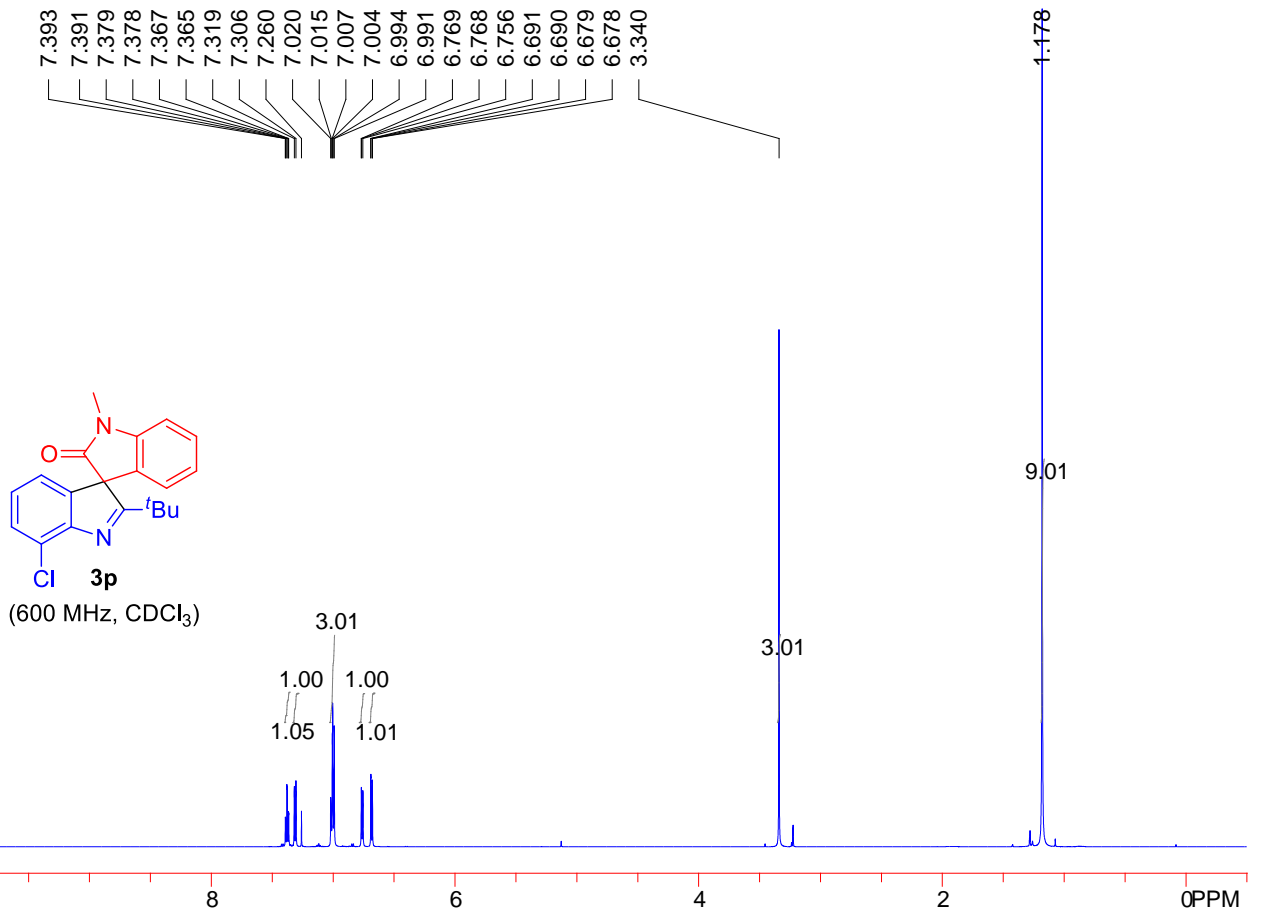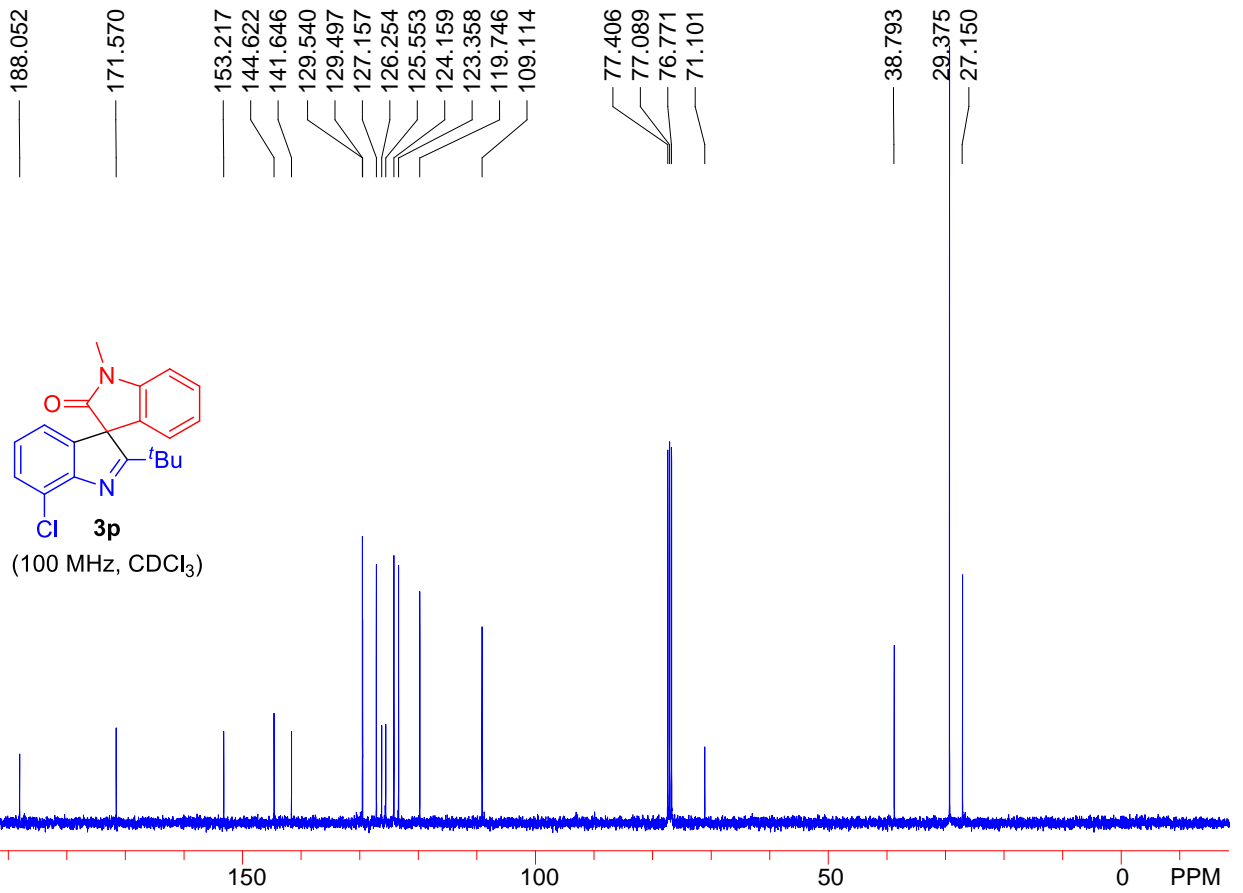

7.790  
7.770  
7.602  
7.584  
7.580  
7.428  
7.425  
7.406  
7.384  
7.381  
7.363  
7.345  
7.326  
7.282  
7.262  
7.250  
7.244  
7.170  
7.153  
7.152  
7.134  
7.133  
7.089  
7.069  
6.980  
6.963  
6.945  
6.927  
6.749  
6.731  
3.402

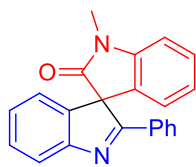

**3q**  
(400 MHz, CDCl<sub>3</sub>)

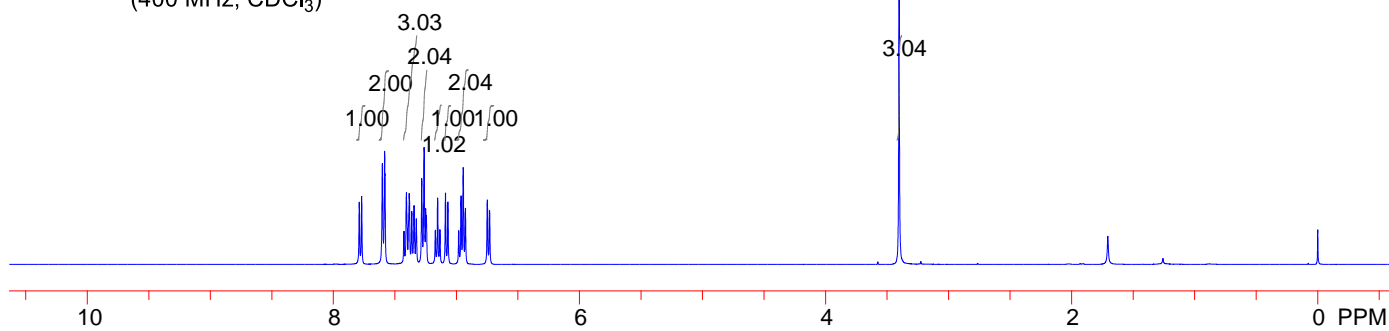

174.155  
172.386  
144.354  
156.431  
140.064  
132.242  
131.245  
129.432  
129.324  
128.818  
127.951  
127.785  
126.695  
123.878  
123.805  
121.725  
121.444  
109.158  
77.399  
77.081  
76.764  
68.999  
27.309

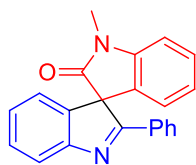

**3q**  
(100 MHz, CDCl<sub>3</sub>)

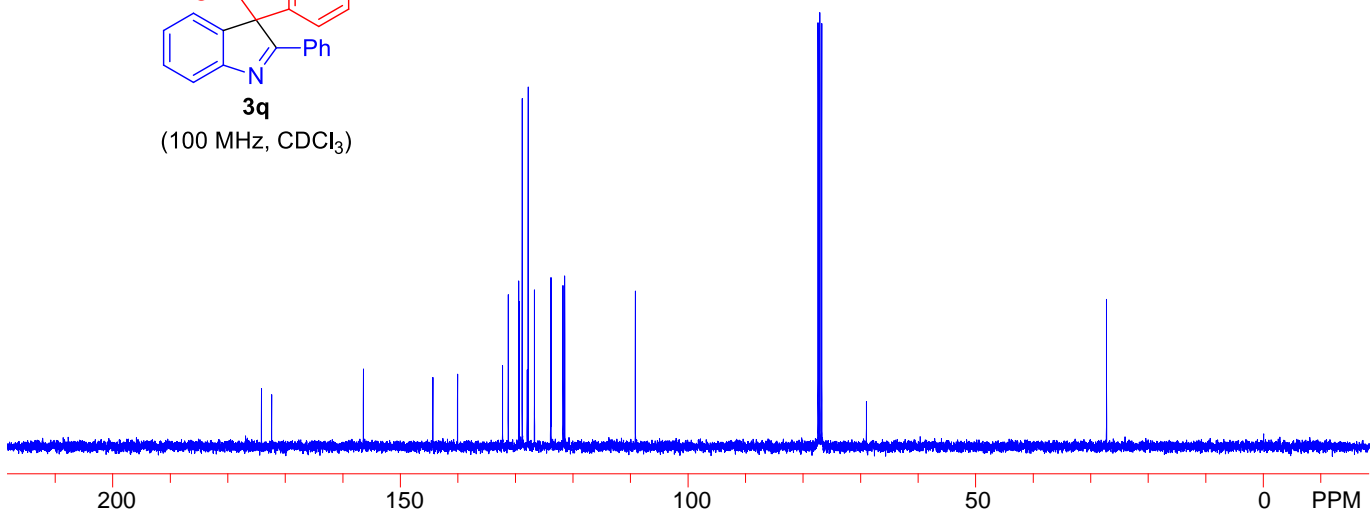

7.624  
7.605  
7.506  
7.487  
7.484  
7.341  
7.339  
7.322  
7.319  
7.303  
7.300  
7.277  
7.258  
7.240  
7.199  
7.180  
7.161  
7.026  
7.006  
6.921  
6.902  
6.883  
6.695  
6.677  
3.346  
2.539  
2.520  
2.502  
2.483  
1.108  
1.089  
1.070

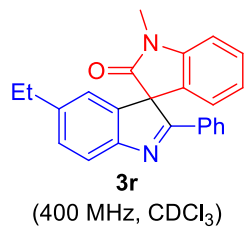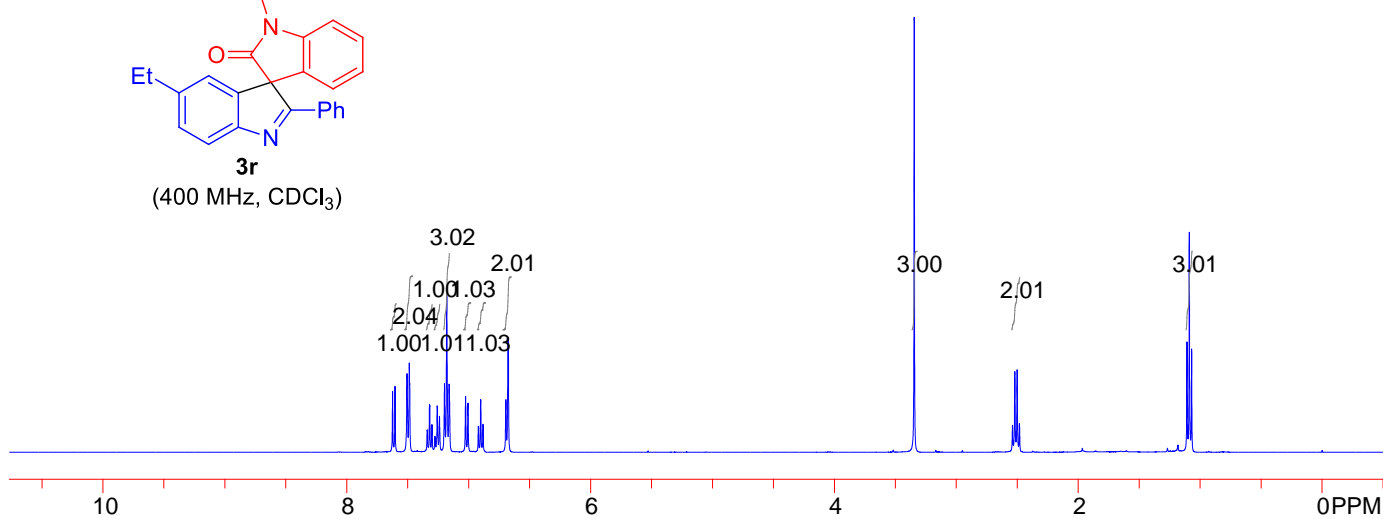

173.282  
172.639  
154.336  
144.362  
143.285  
140.158  
132.350  
131.021  
129.324  
128.775  
128.219  
127.648  
123.943  
123.777  
121.234  
121.075  
109.078  
77.370  
77.052  
76.735  
68.862  
28.862  
27.309  
15.594

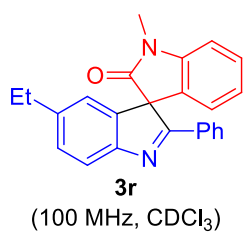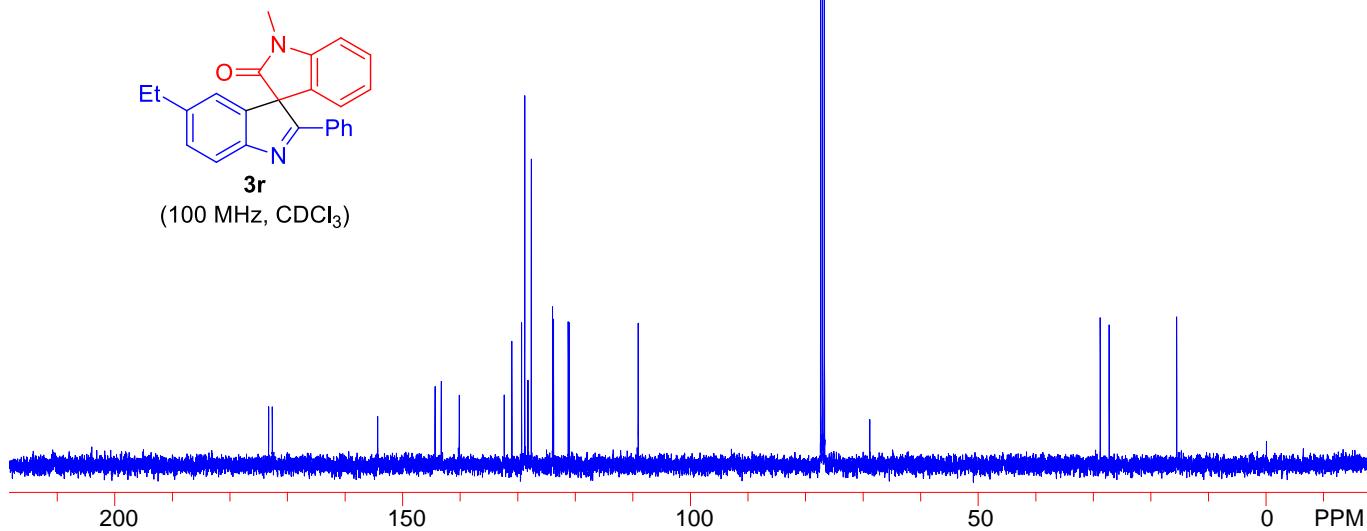

7.605  
7.593  
7.574  
7.405  
7.403  
7.385  
7.383  
7.366  
7.363  
7.345  
7.327  
7.281  
7.260  
7.243  
7.086  
7.066  
6.987  
6.968  
6.949  
6.832  
6.813  
6.757  
6.739  
3.406  
2.433

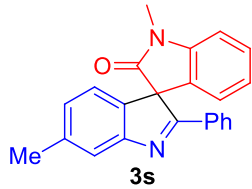

(400 MHz, CDCl<sub>3</sub>)

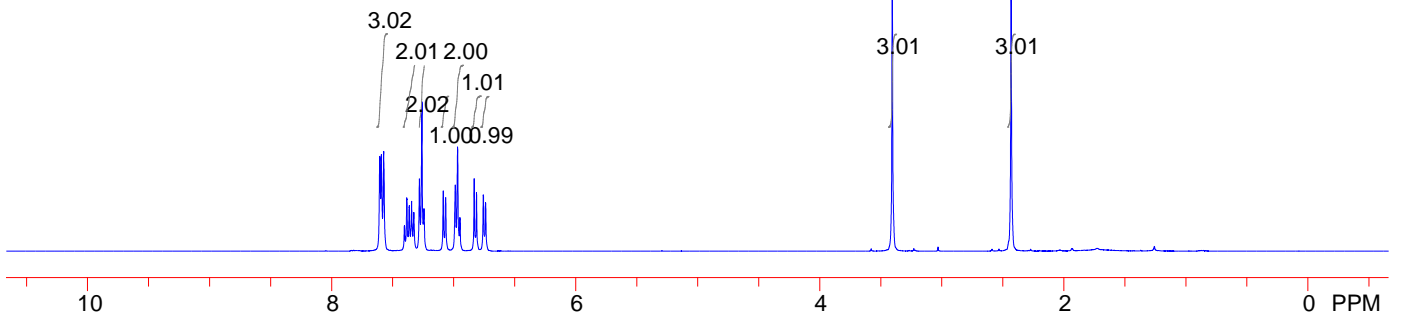

174.276  
172.570  
156.659  
139.458  
137.124  
144.343  
132.348  
131.130  
129.307  
128.775  
128.177  
127.747  
127.412  
123.853  
123.744  
122.161  
121.286  
109.051  
77.258  
77.047  
76.836  
68.691  
27.280  
21.680

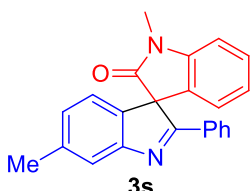

(150 MHz, CDCl<sub>3</sub>)

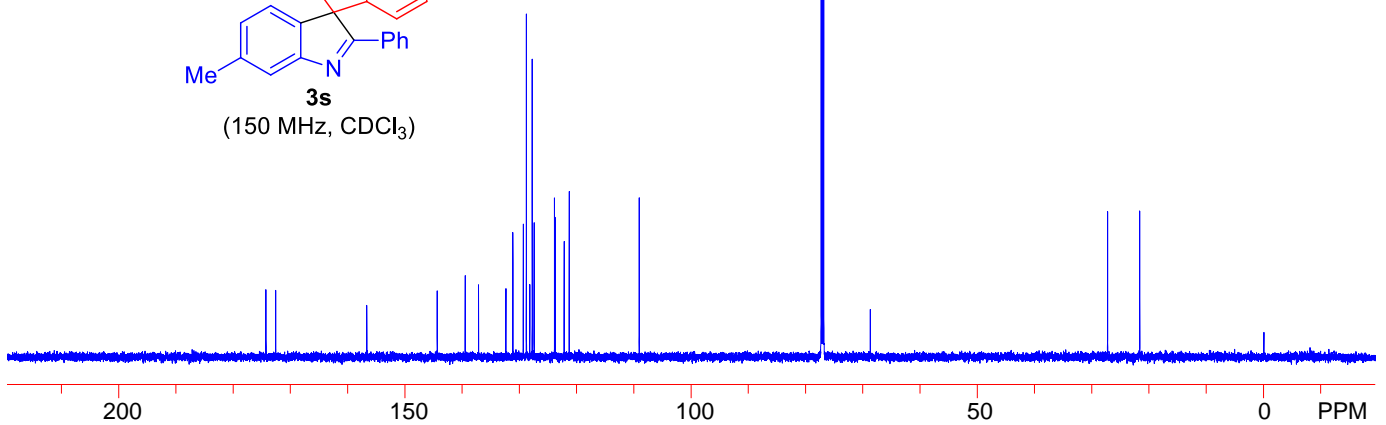

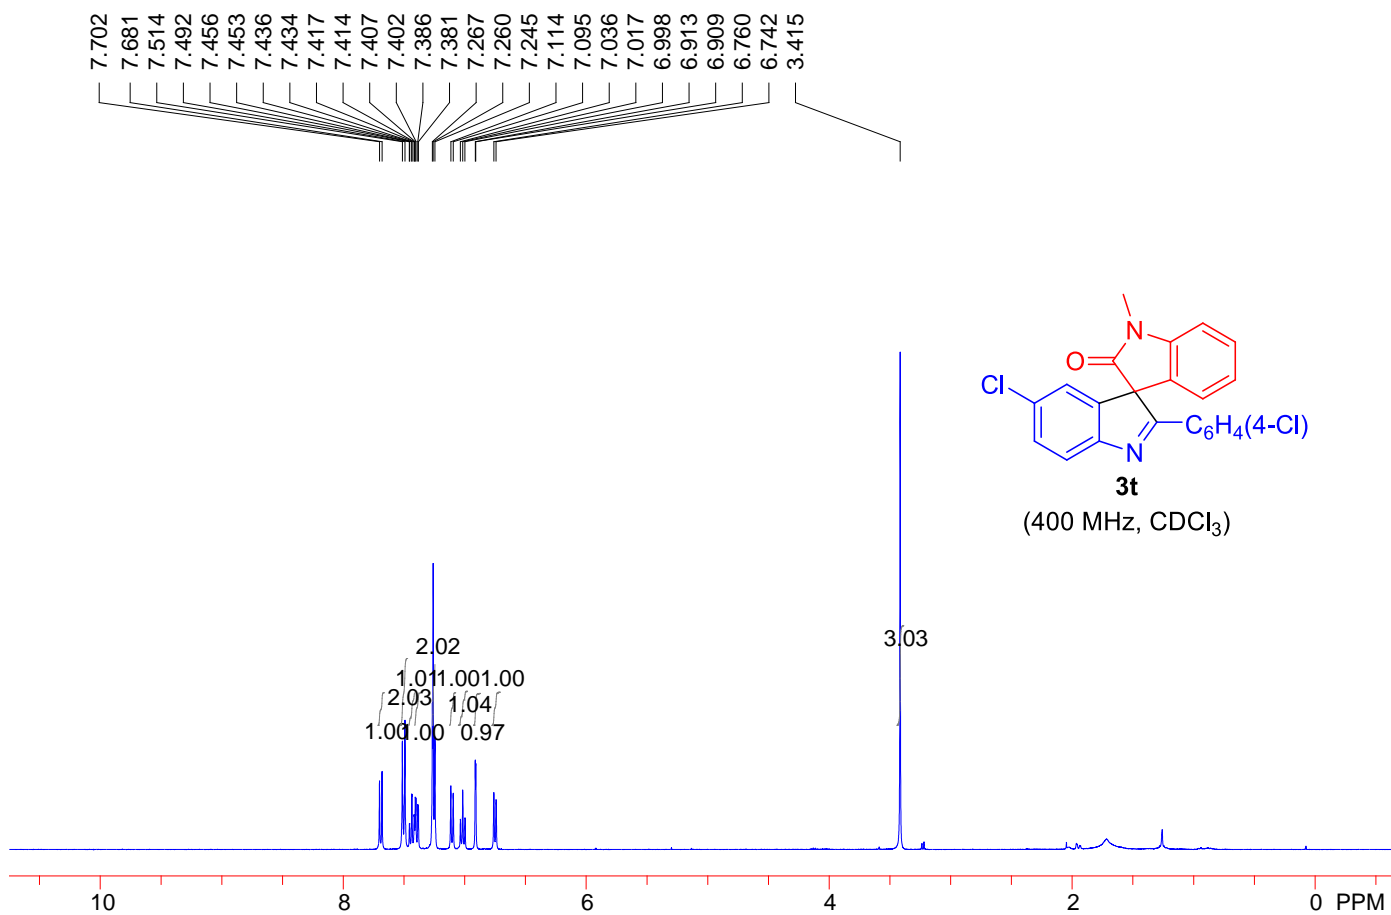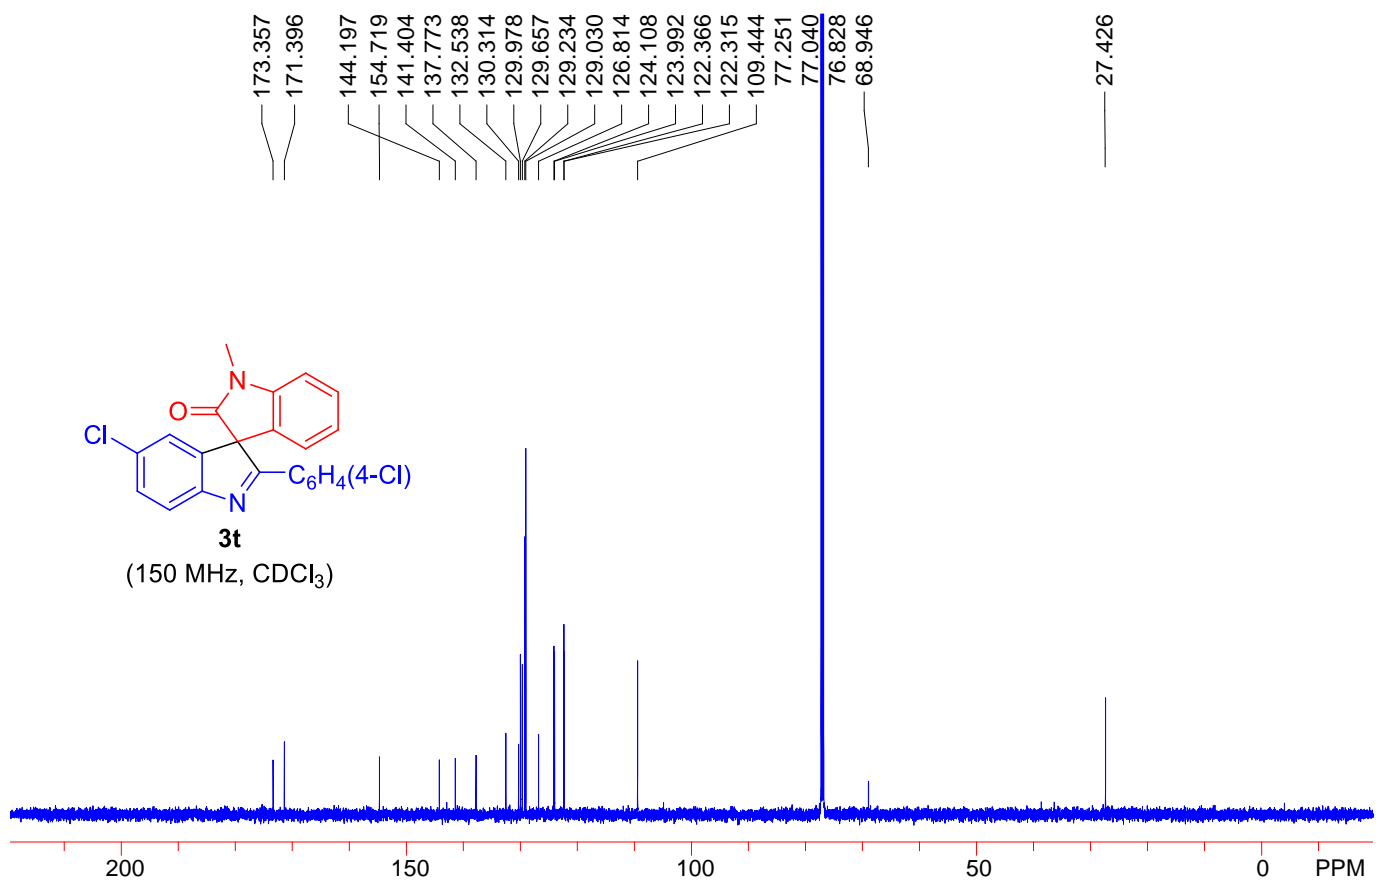

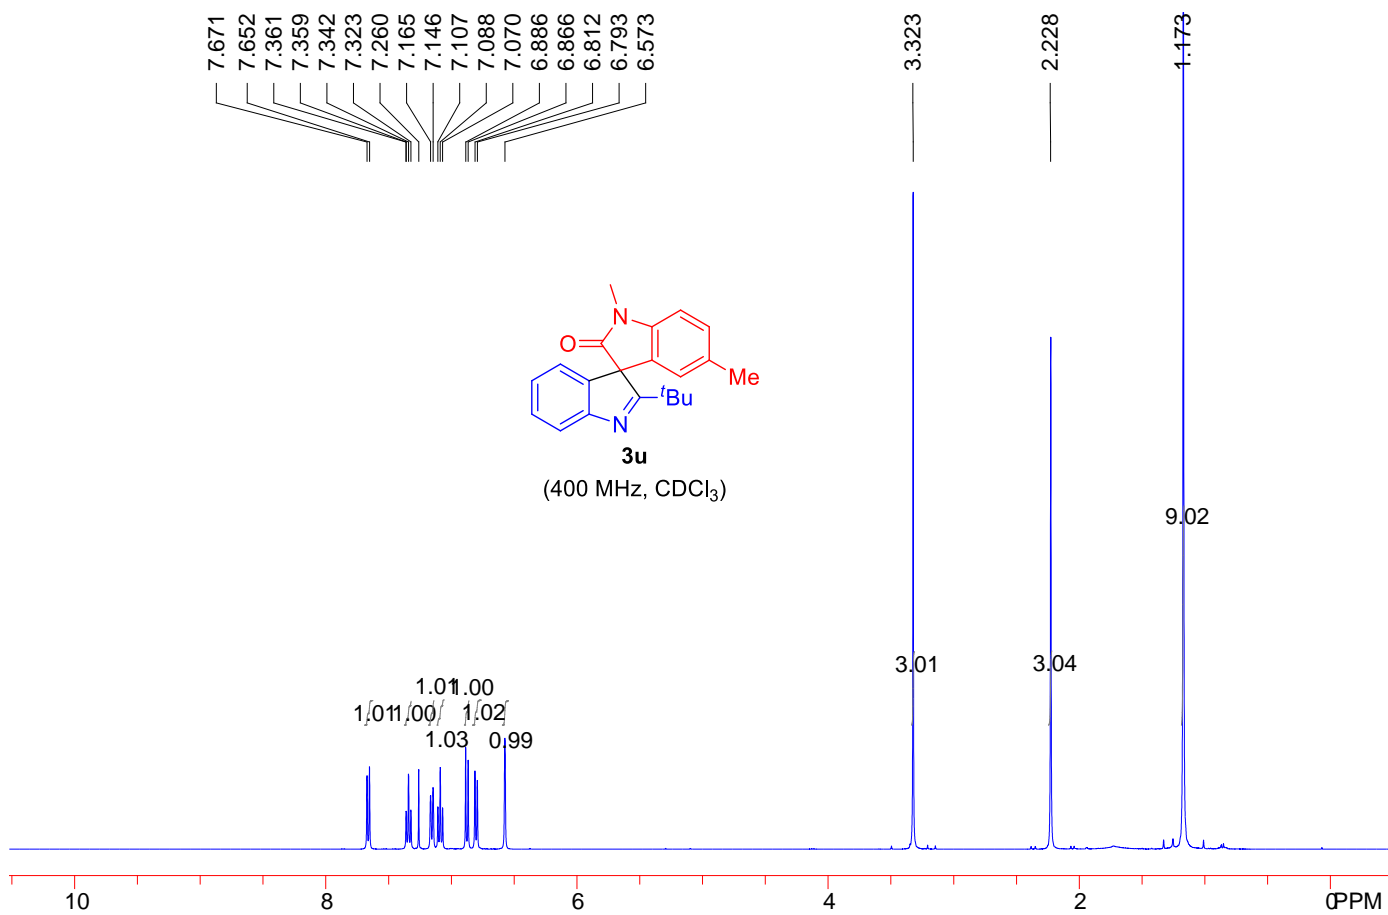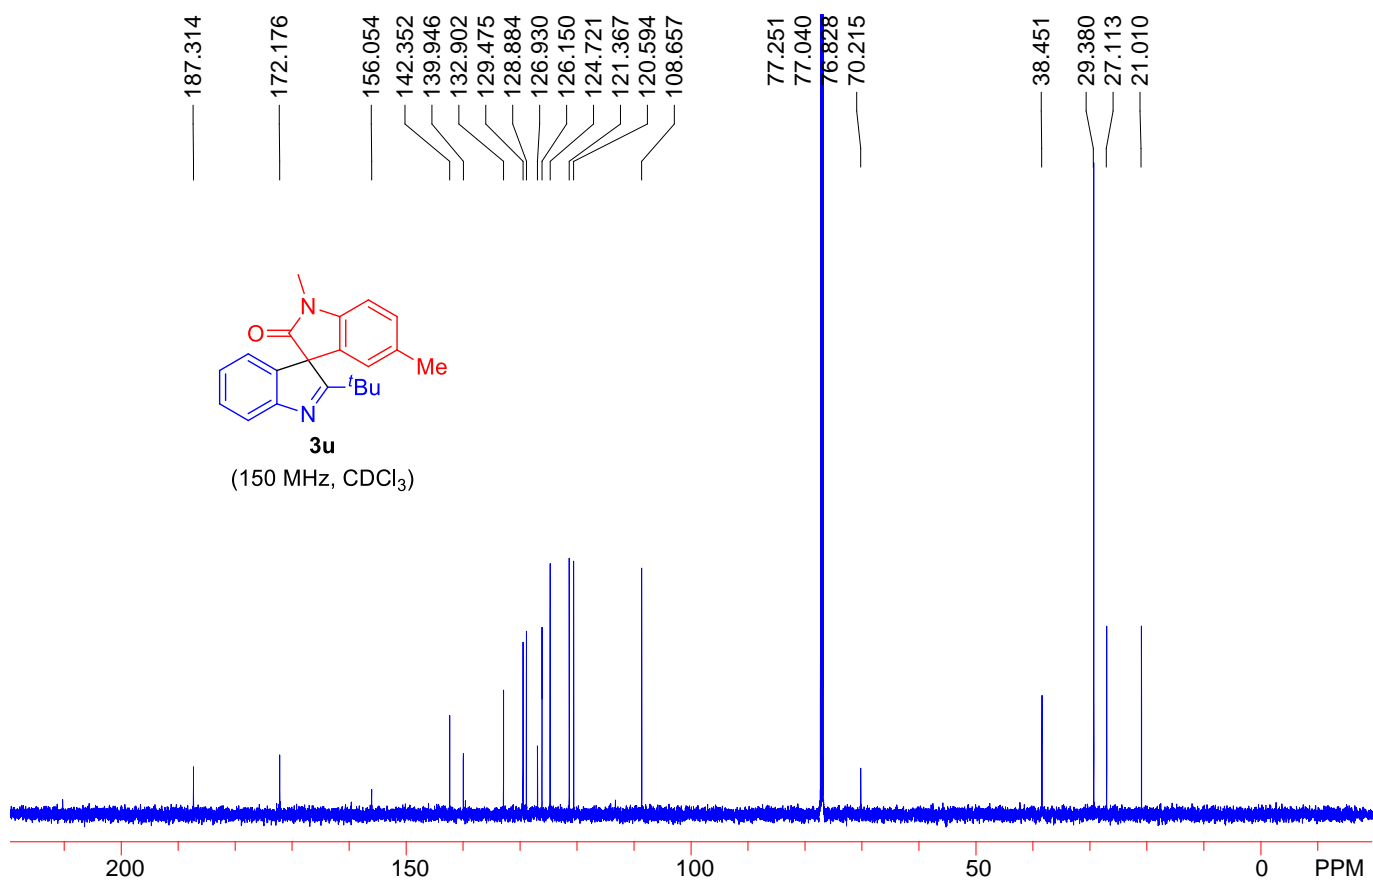



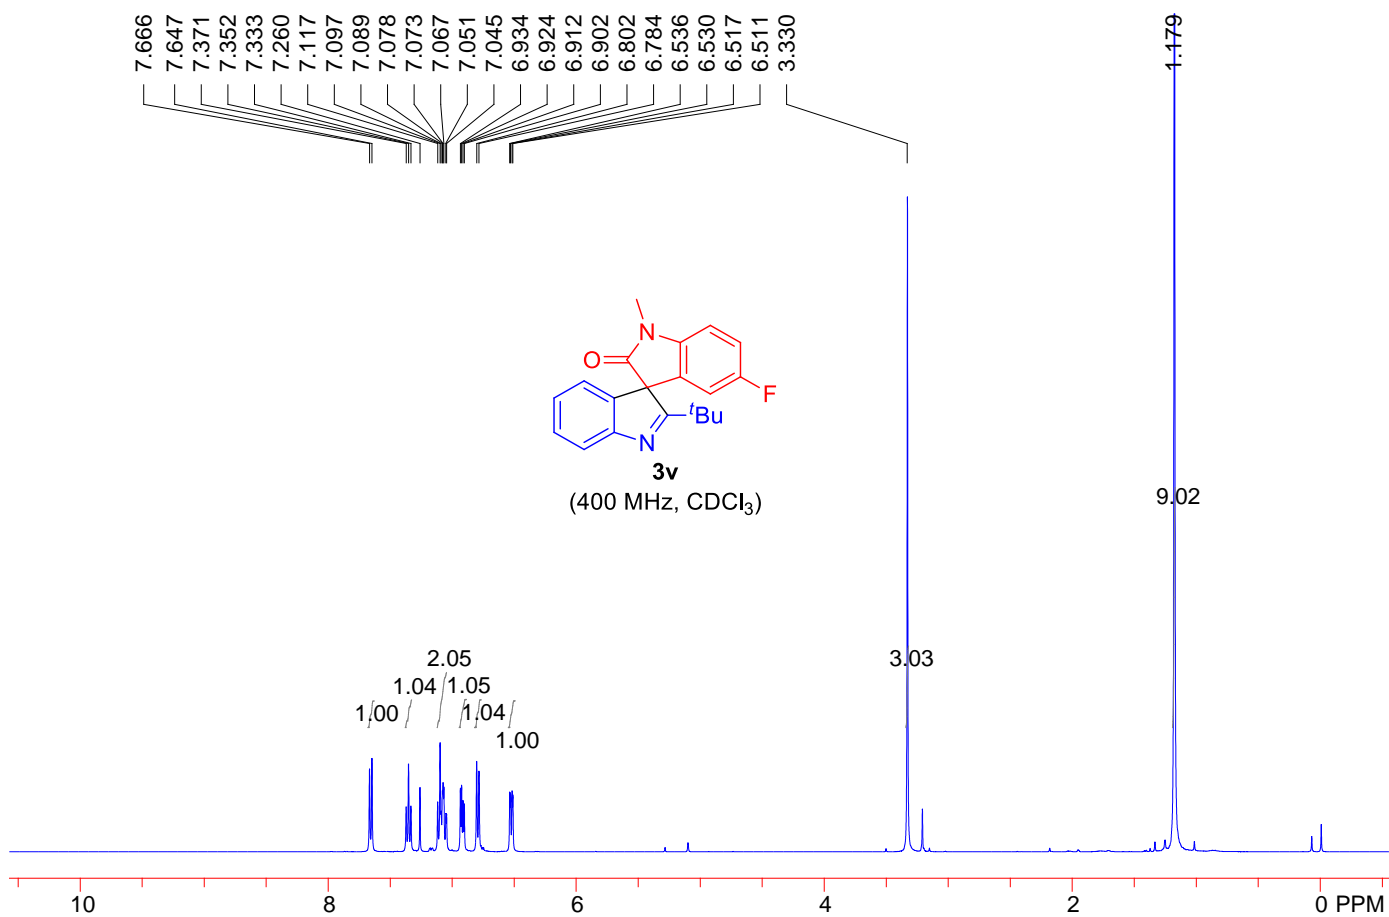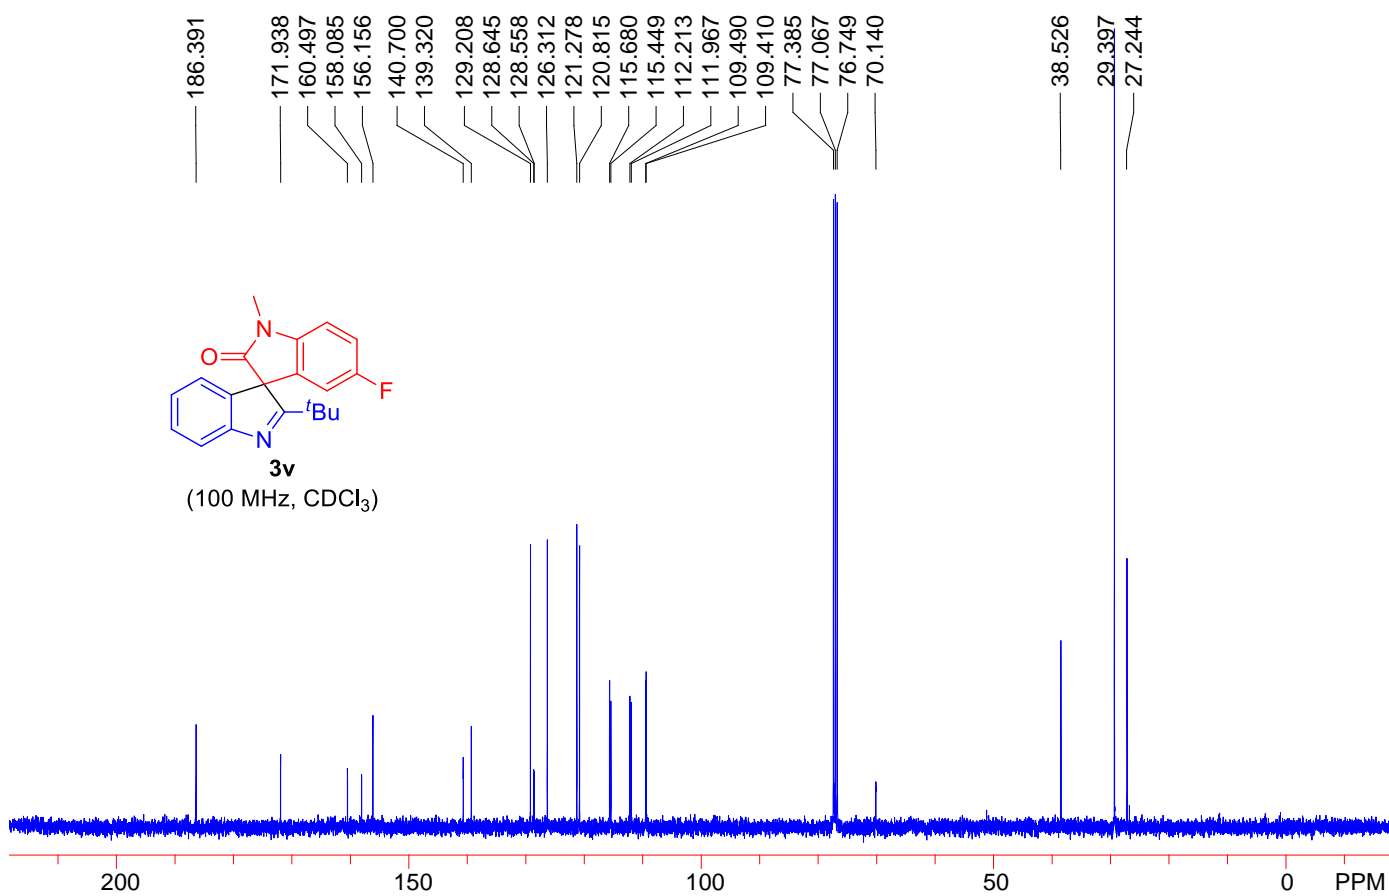

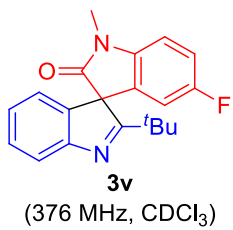

119.108  
119.120  
119.131  
119.142  
119.153  
119.164

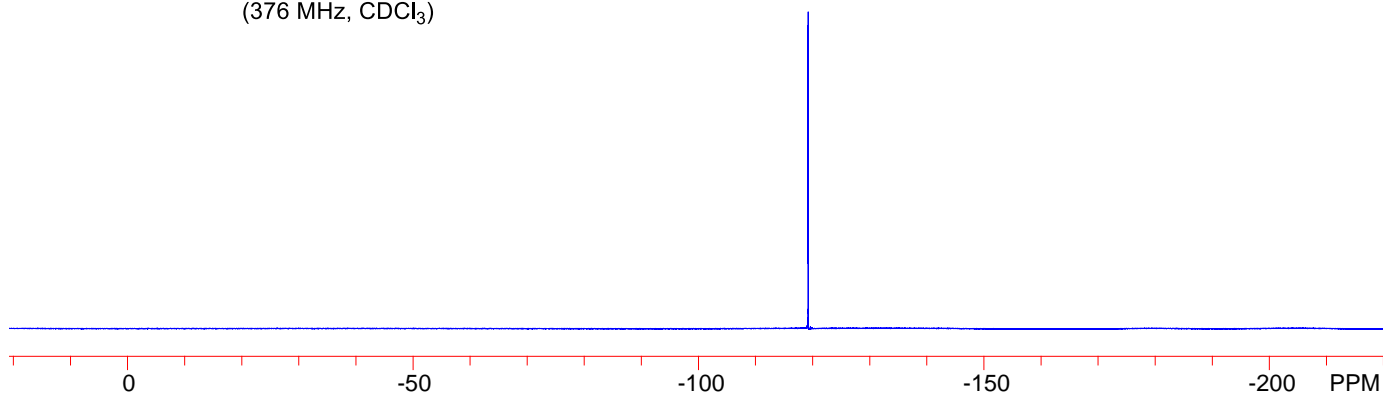

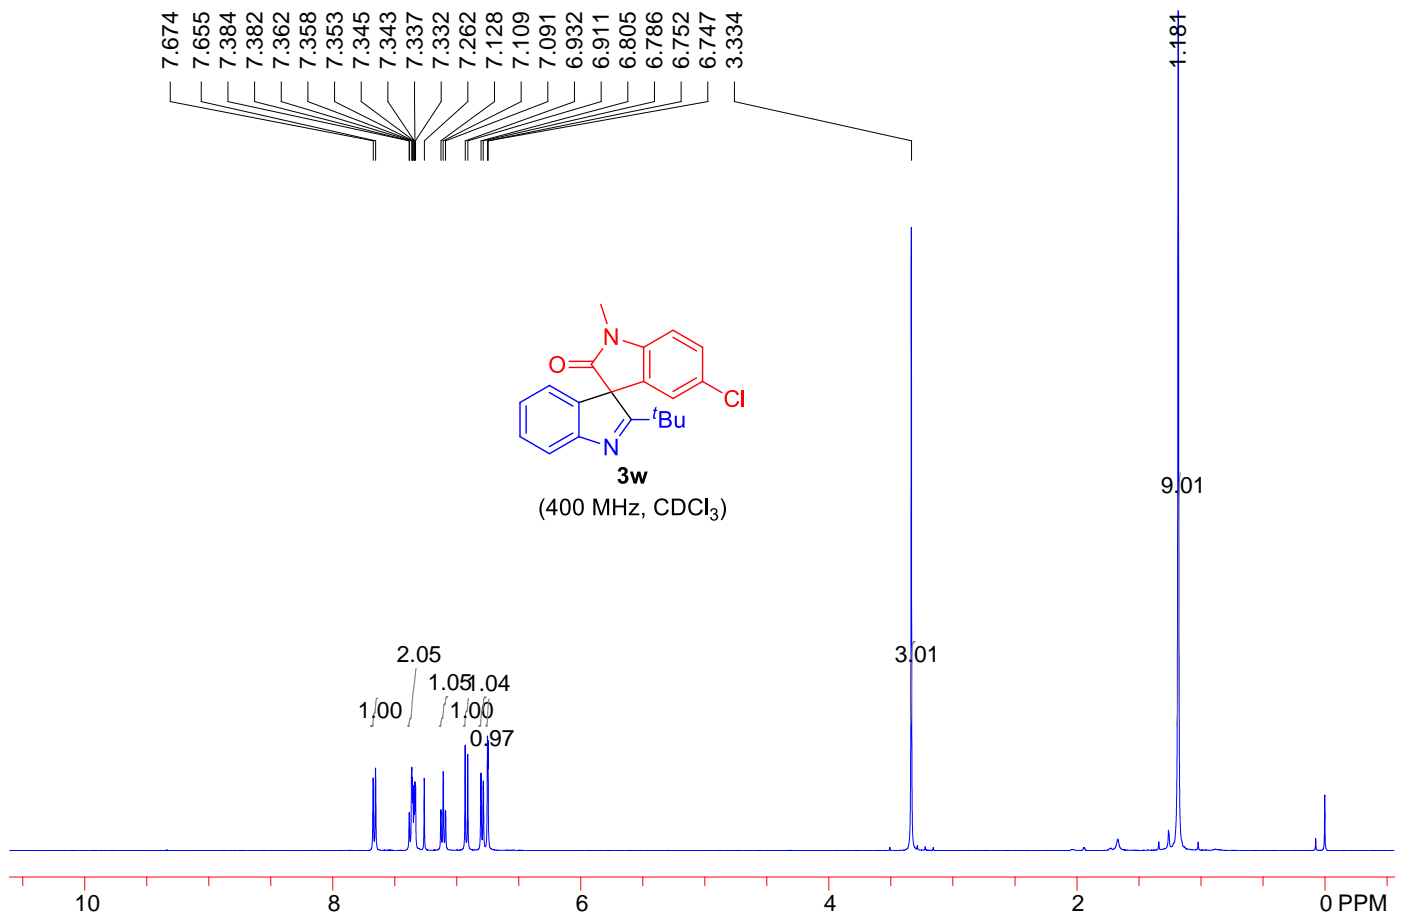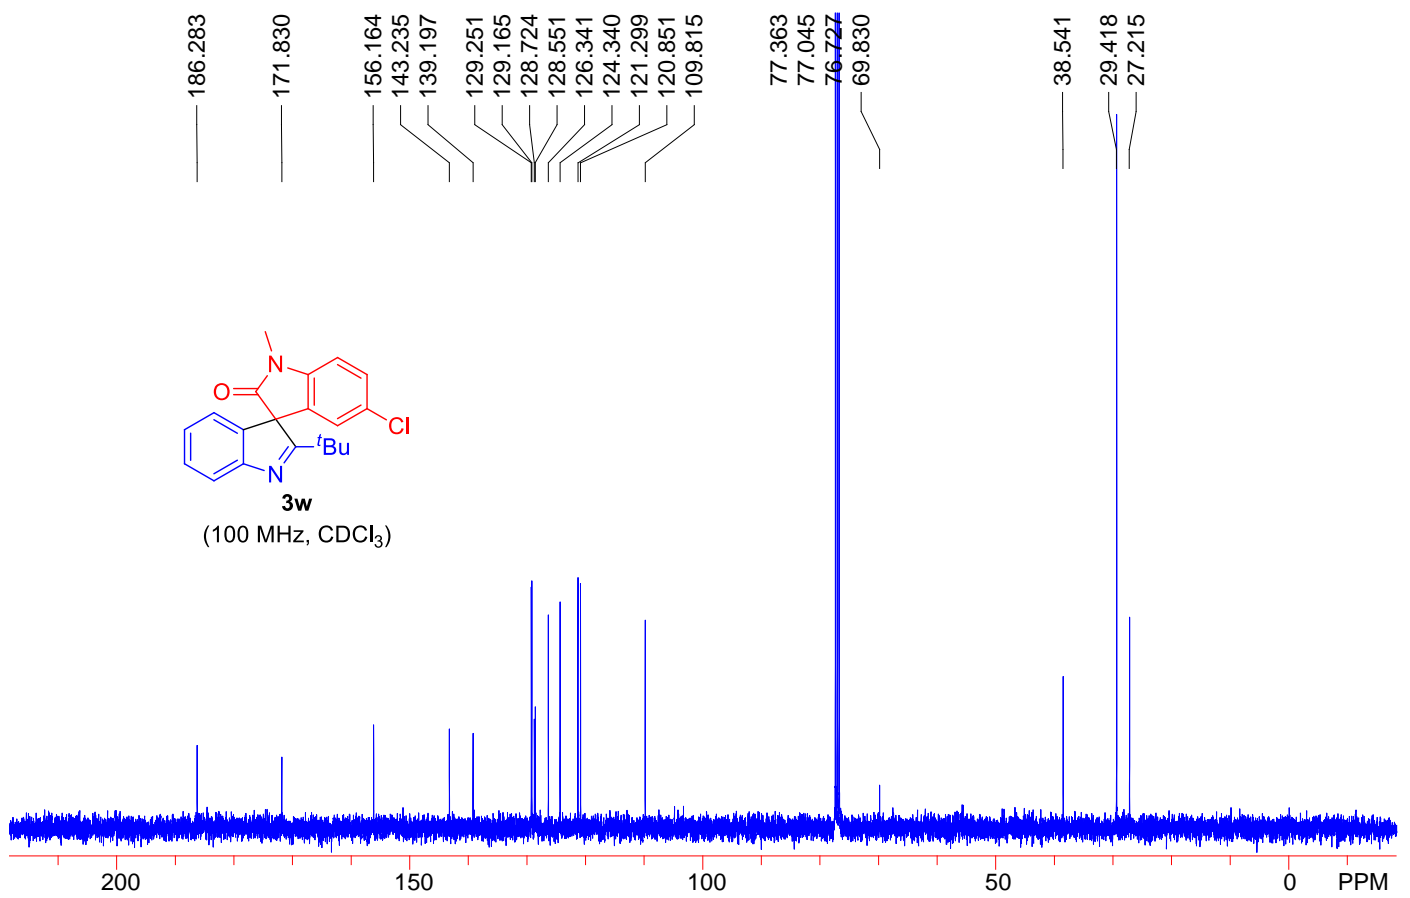

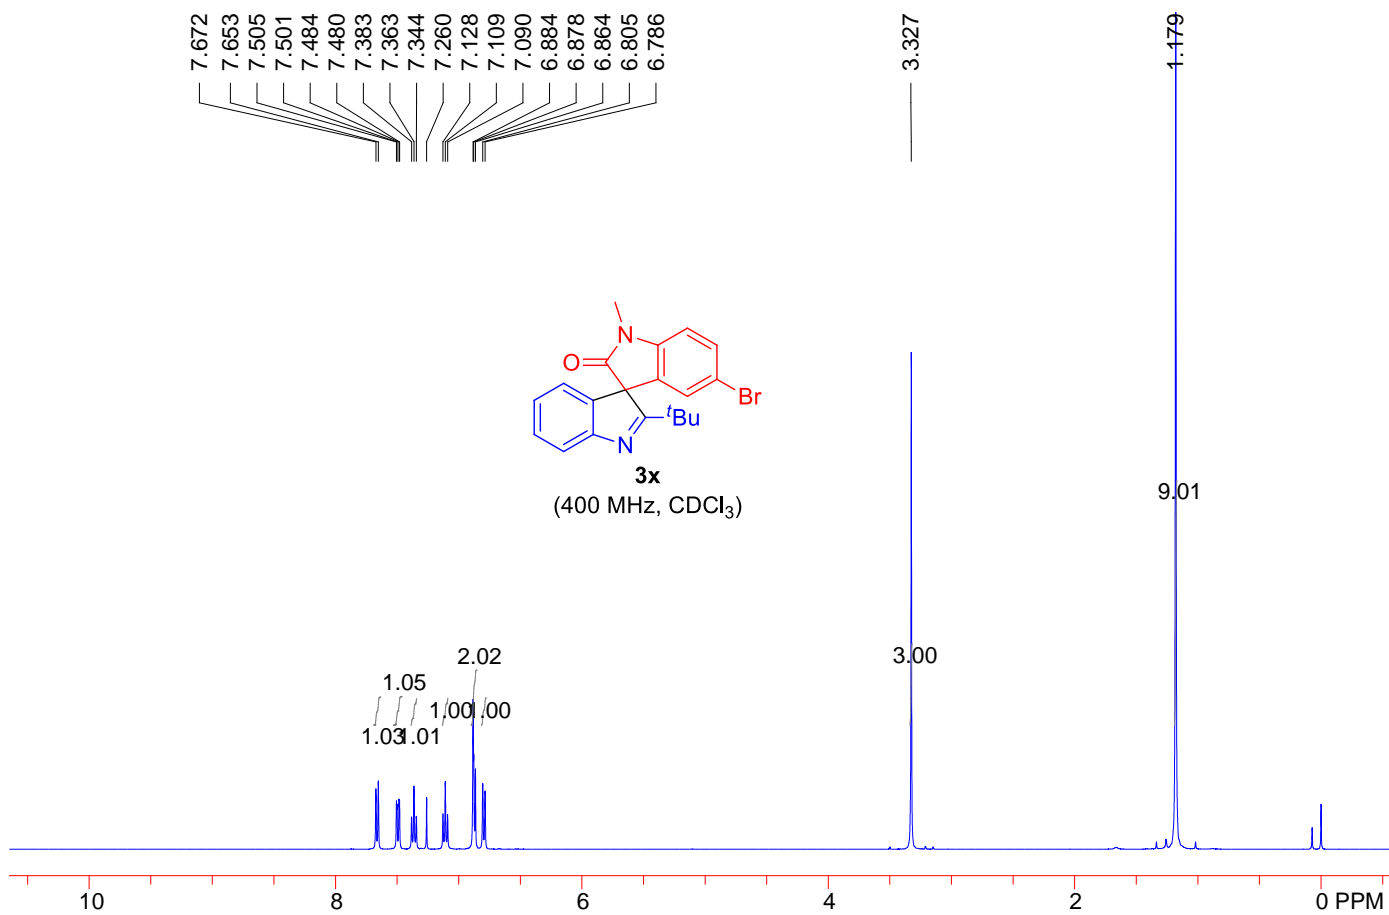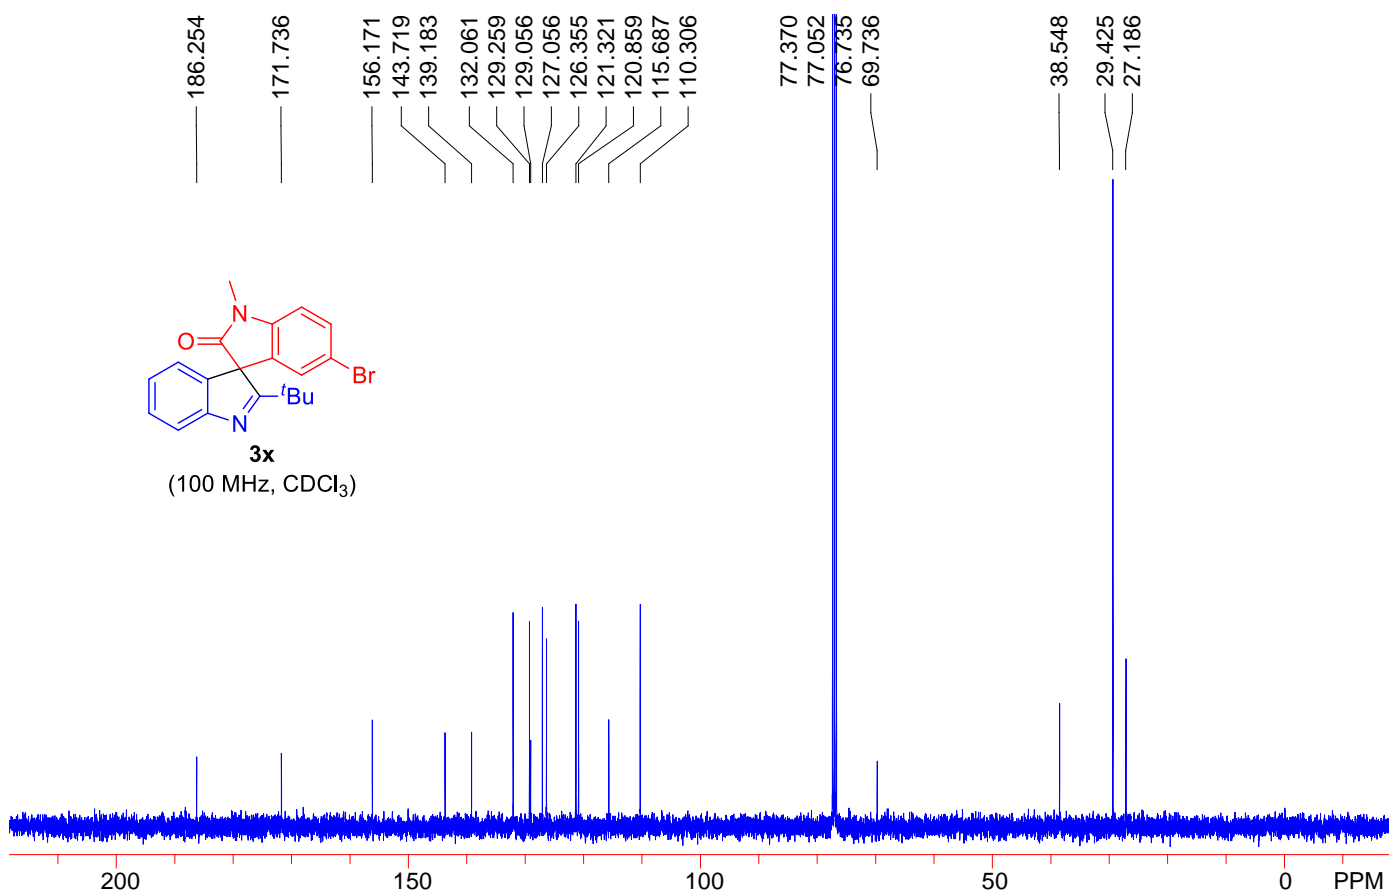

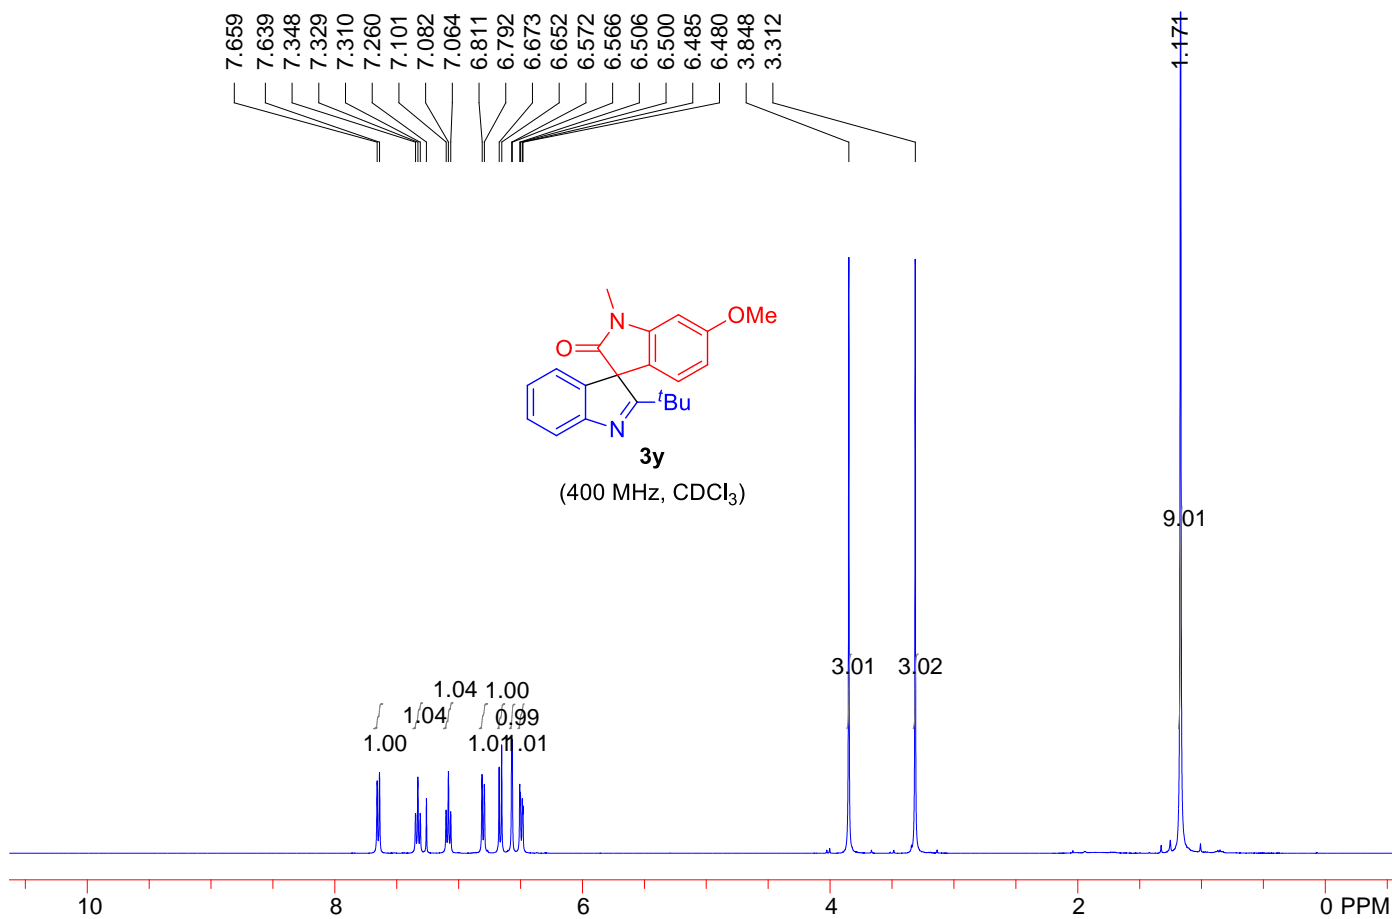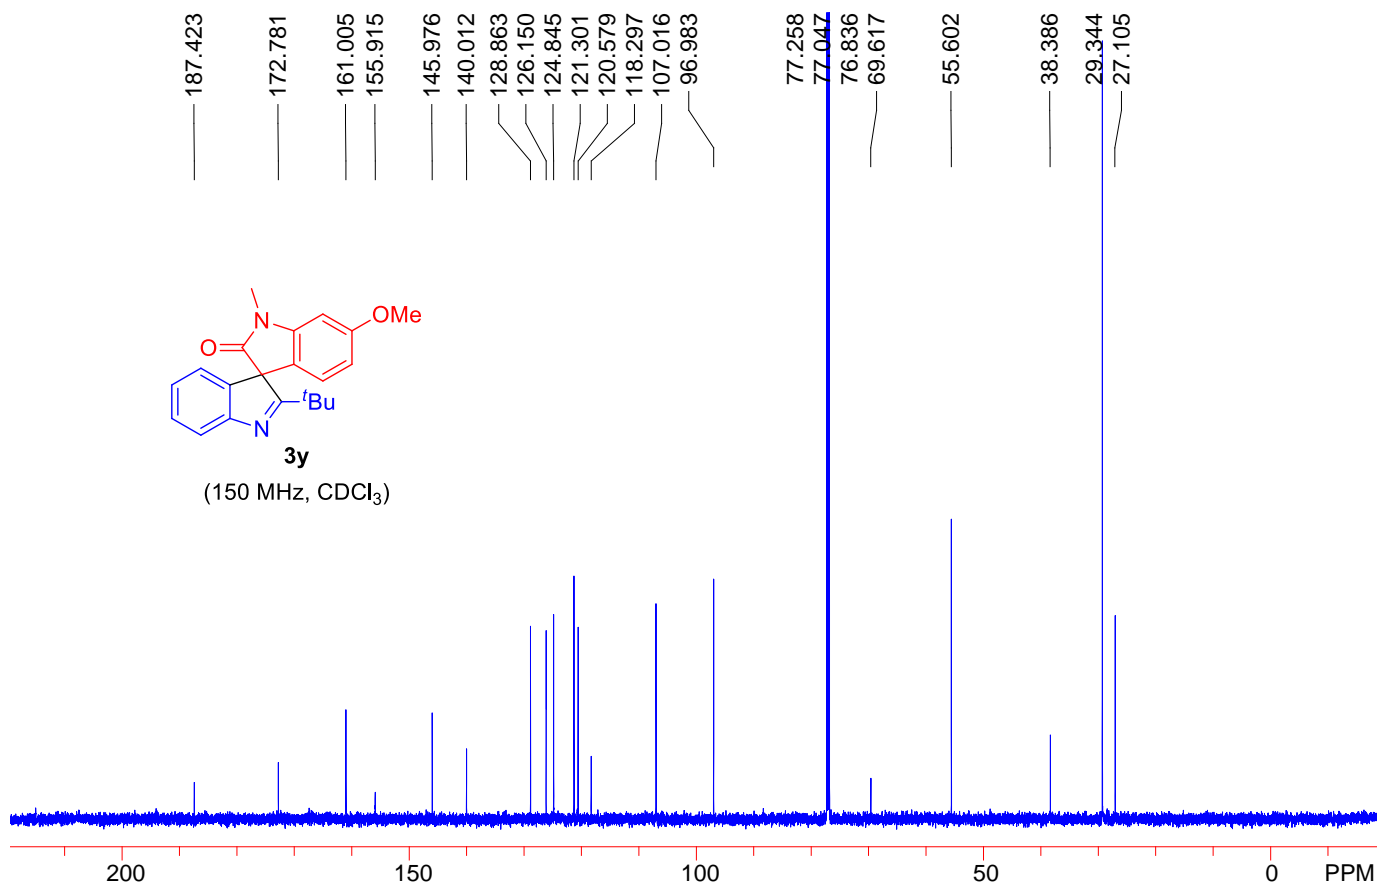

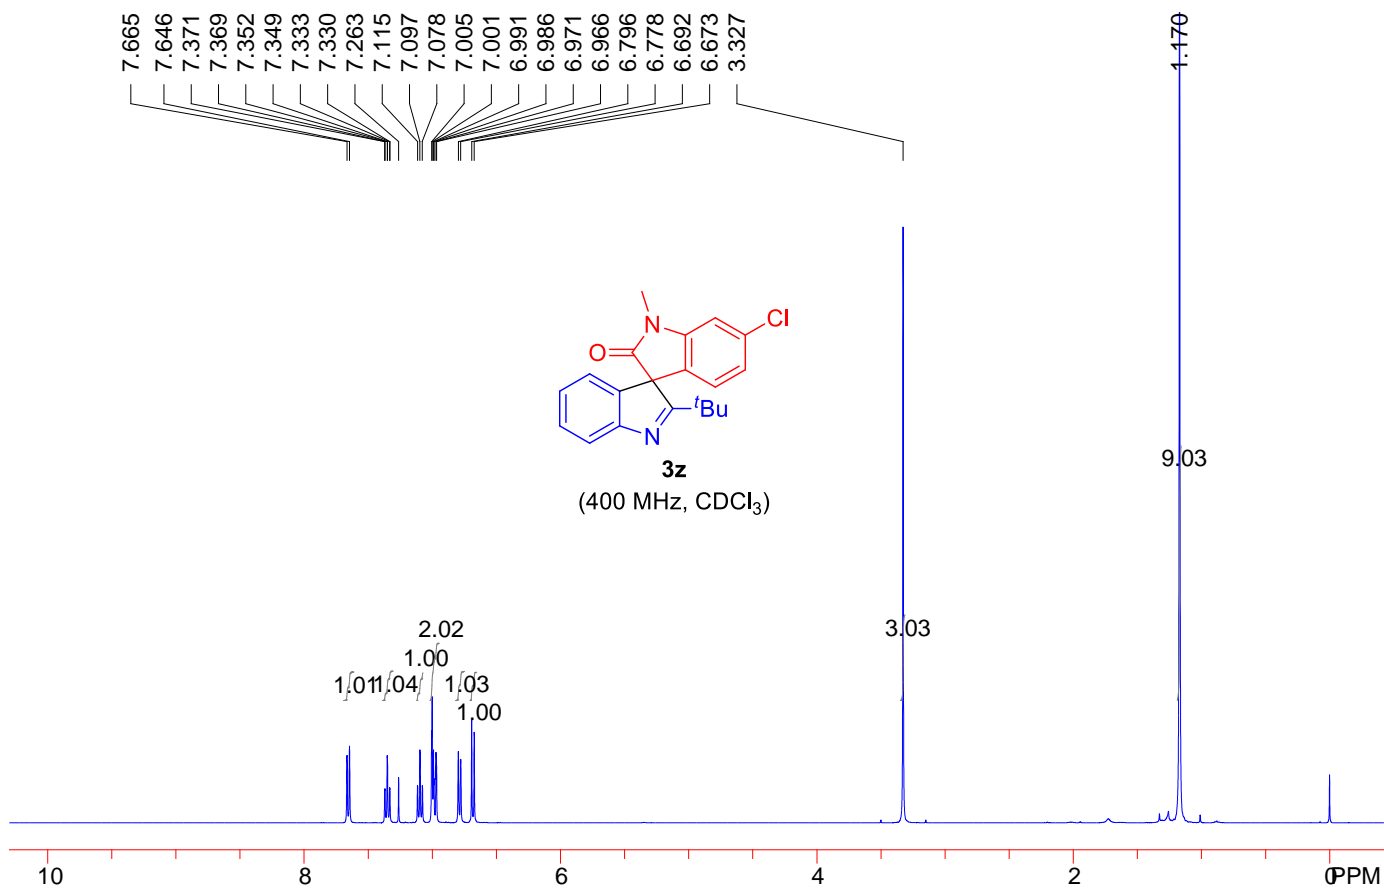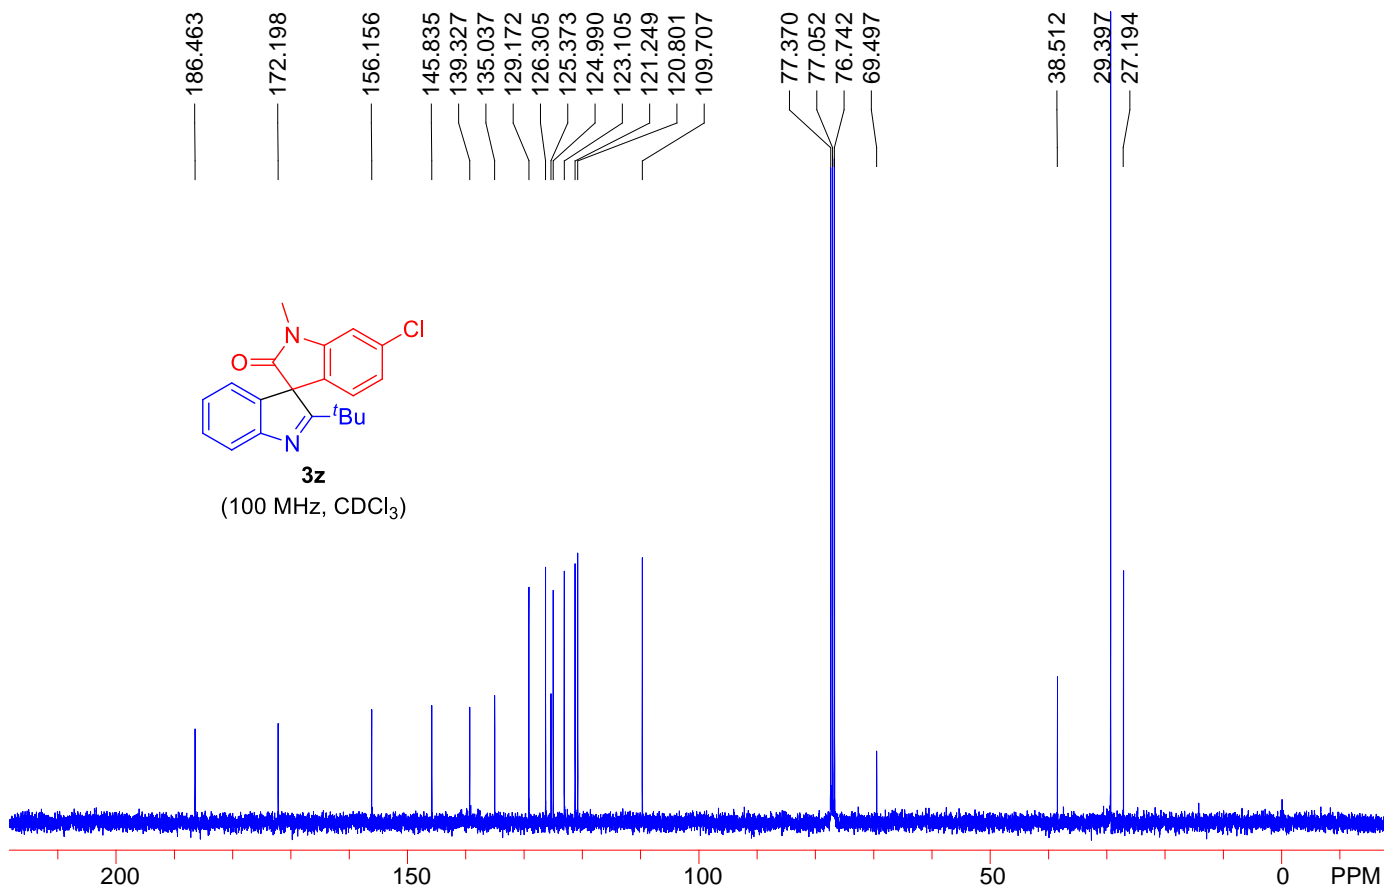

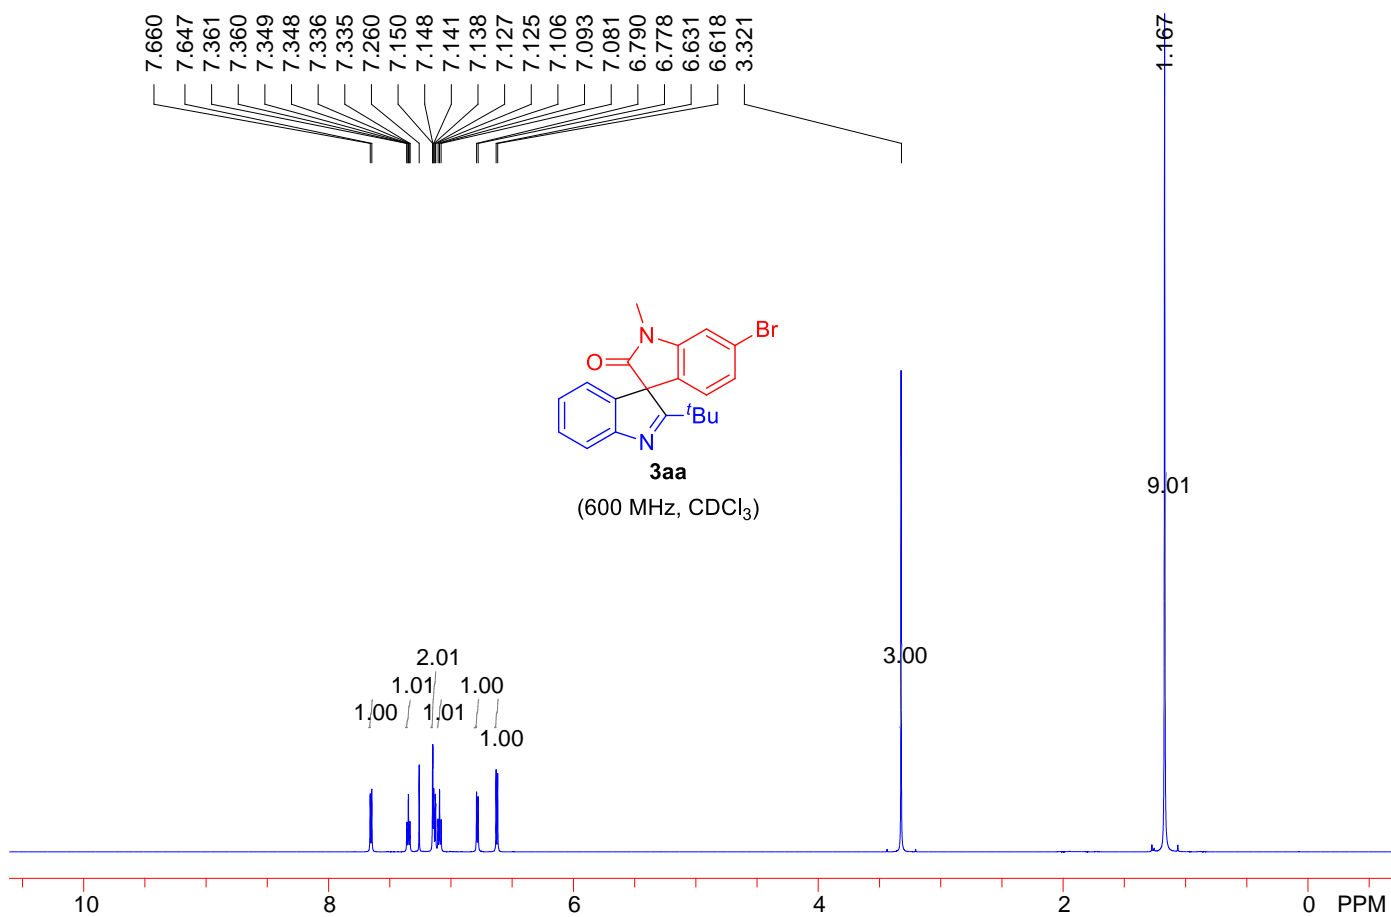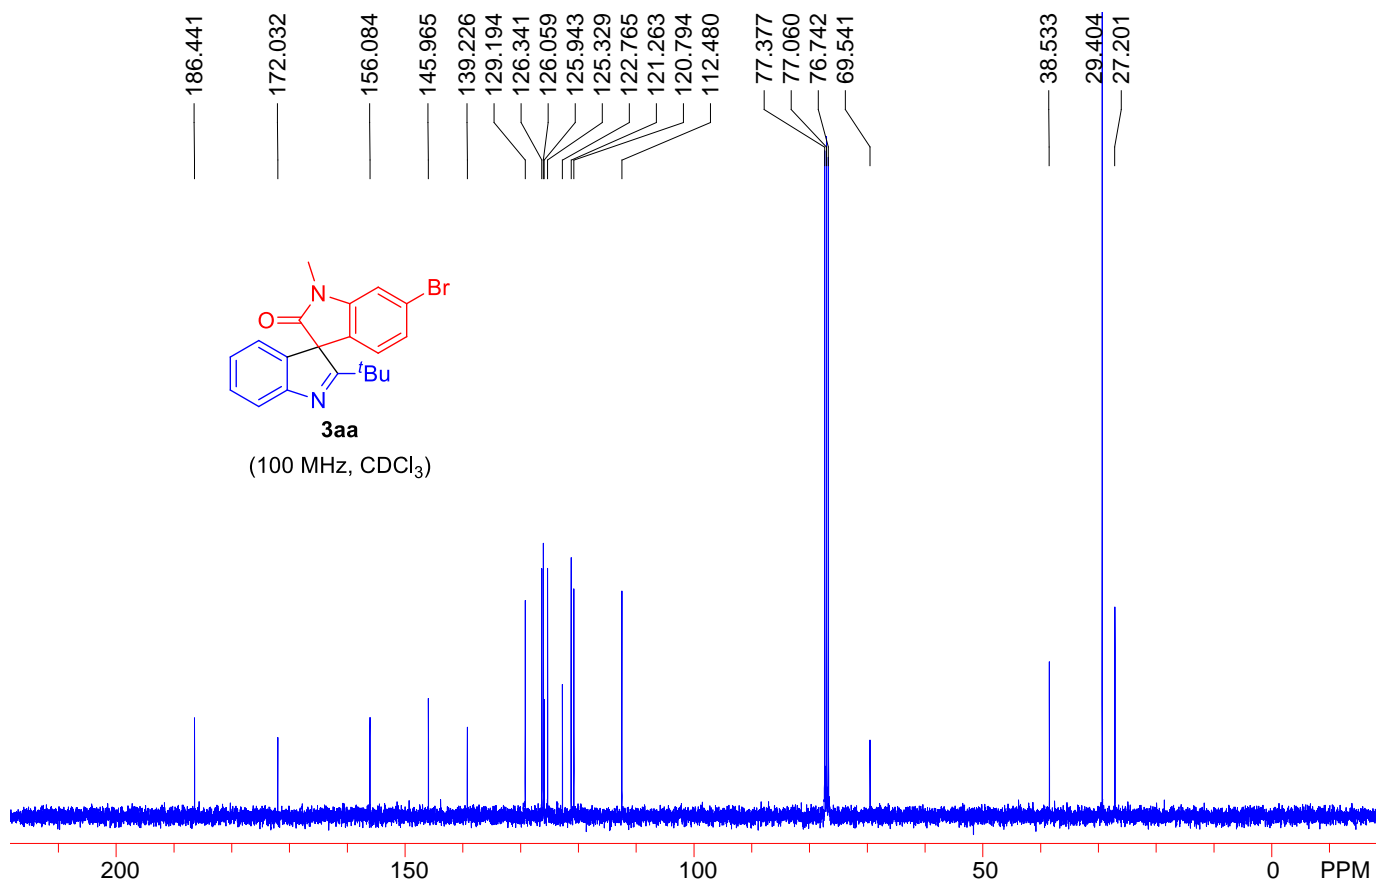

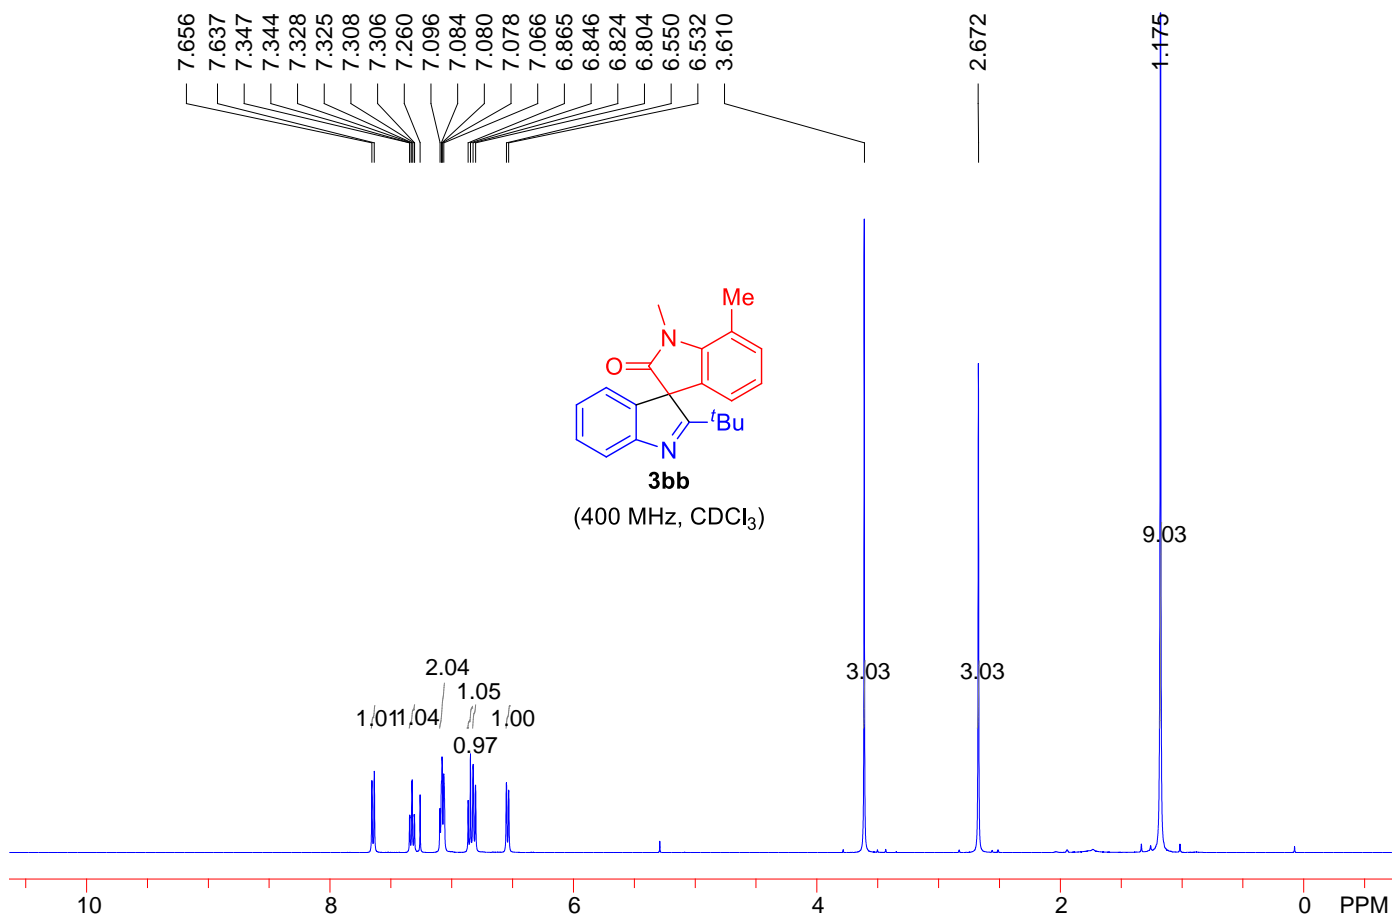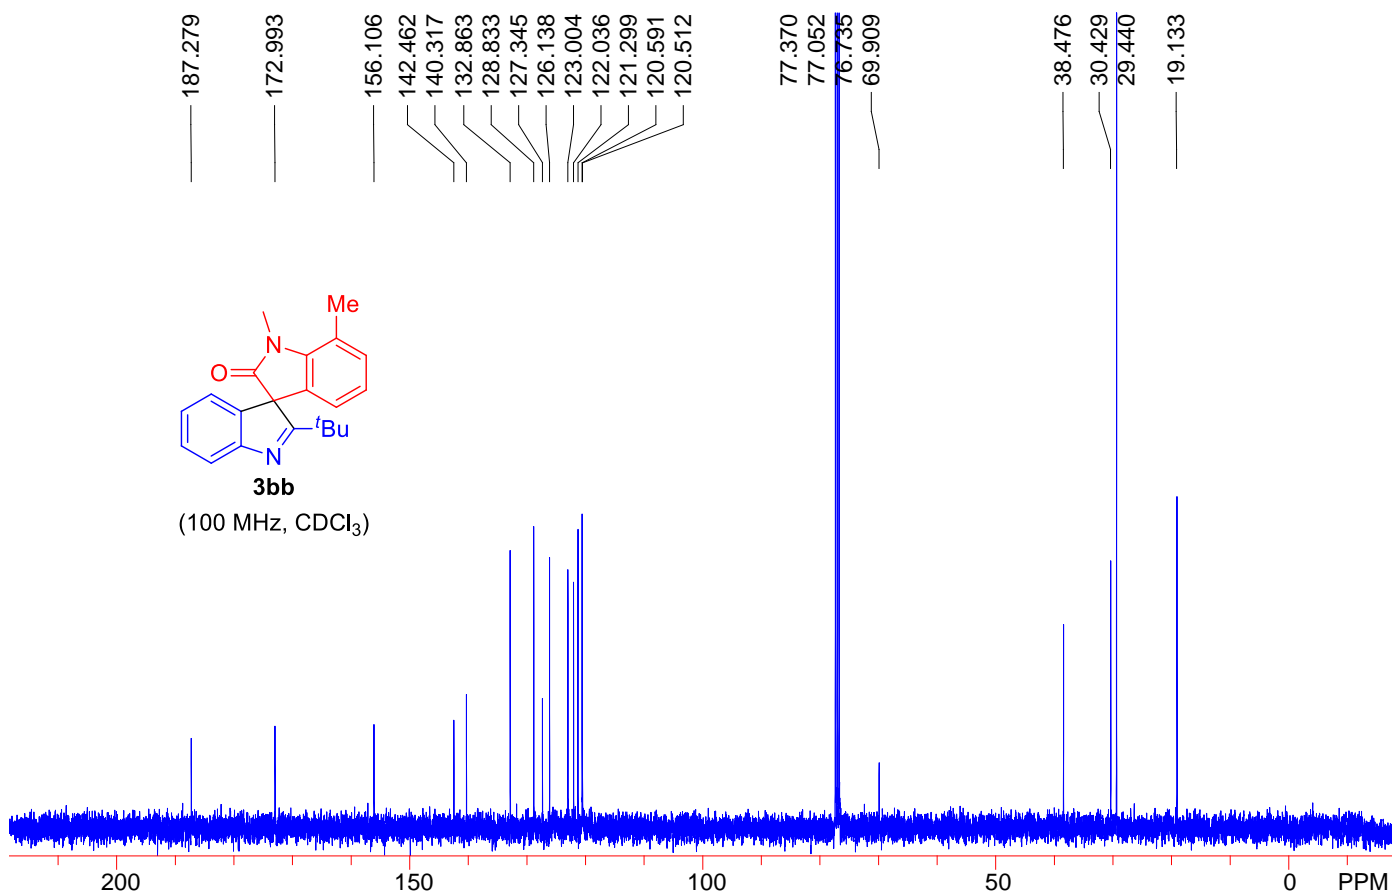



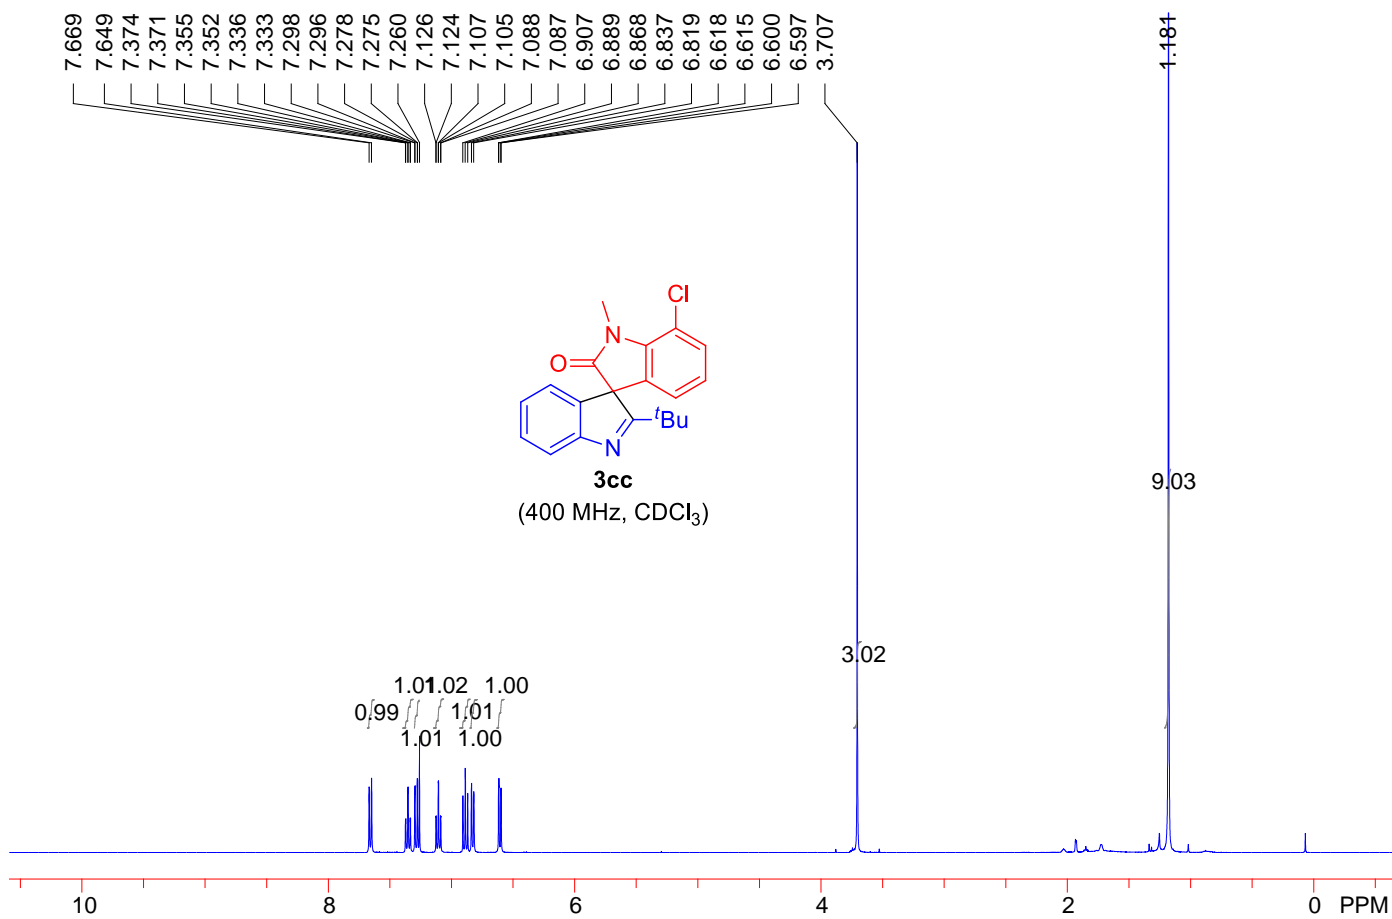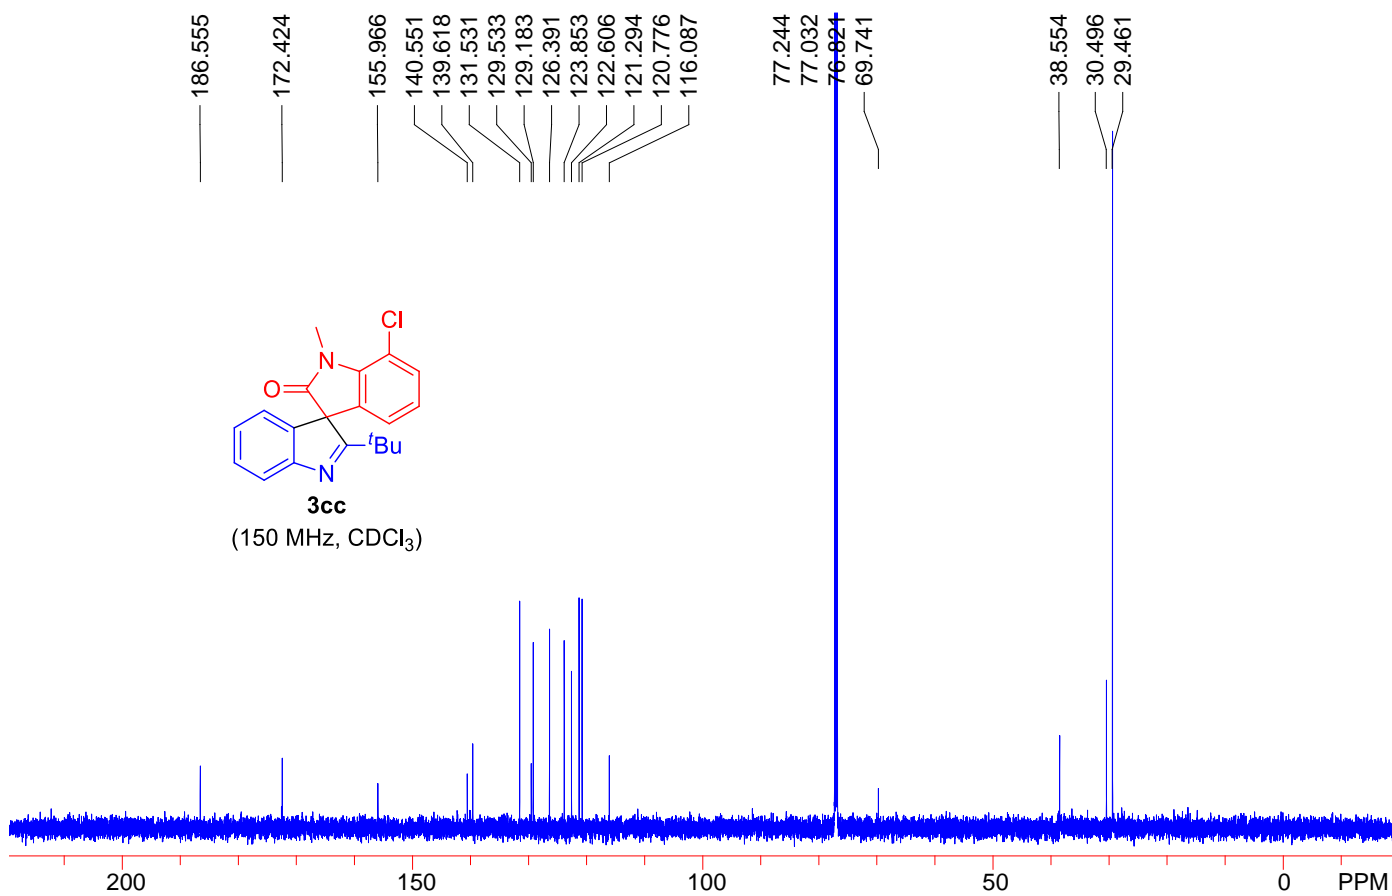

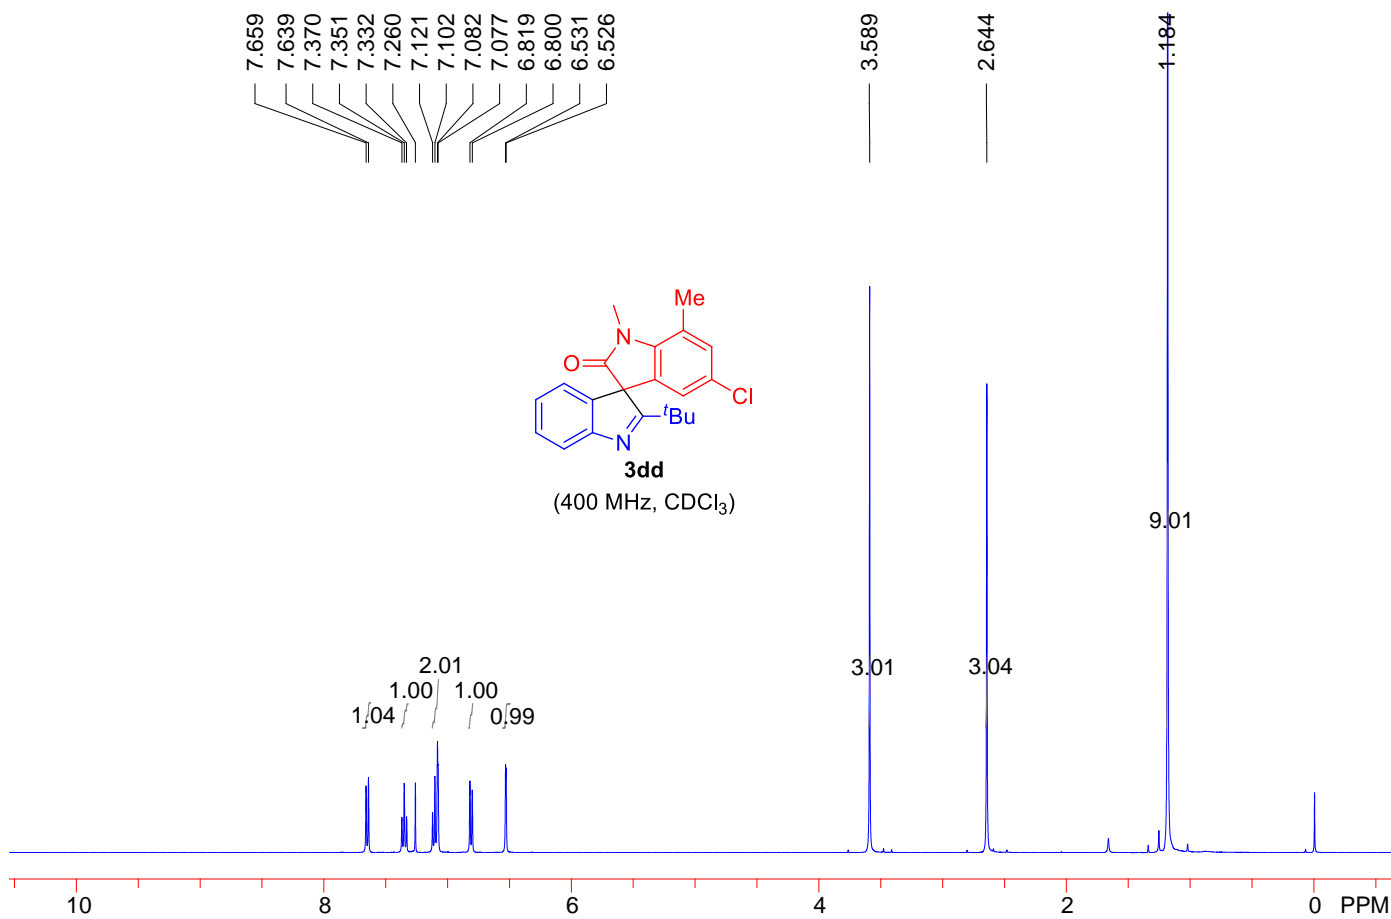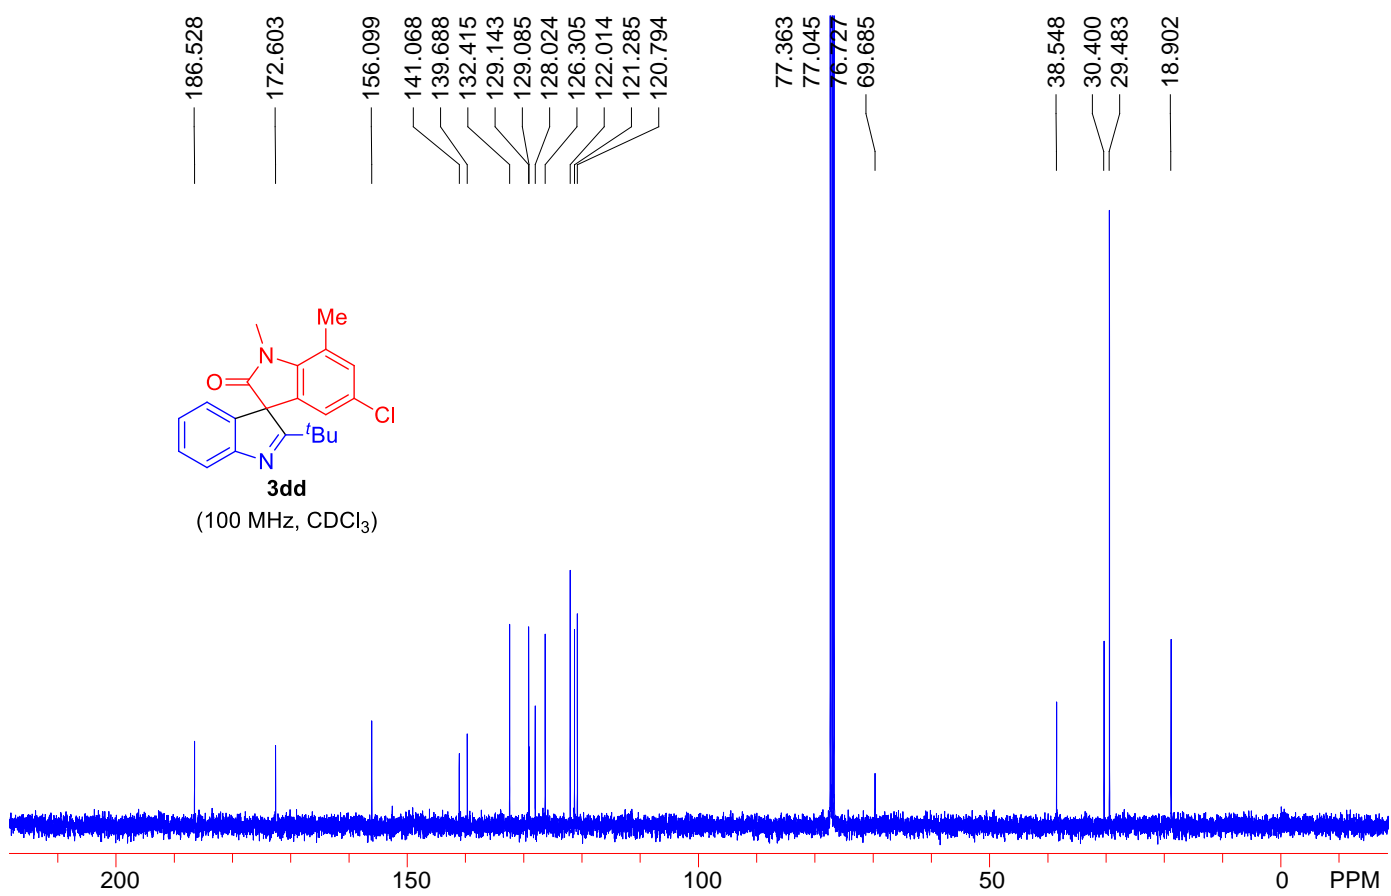

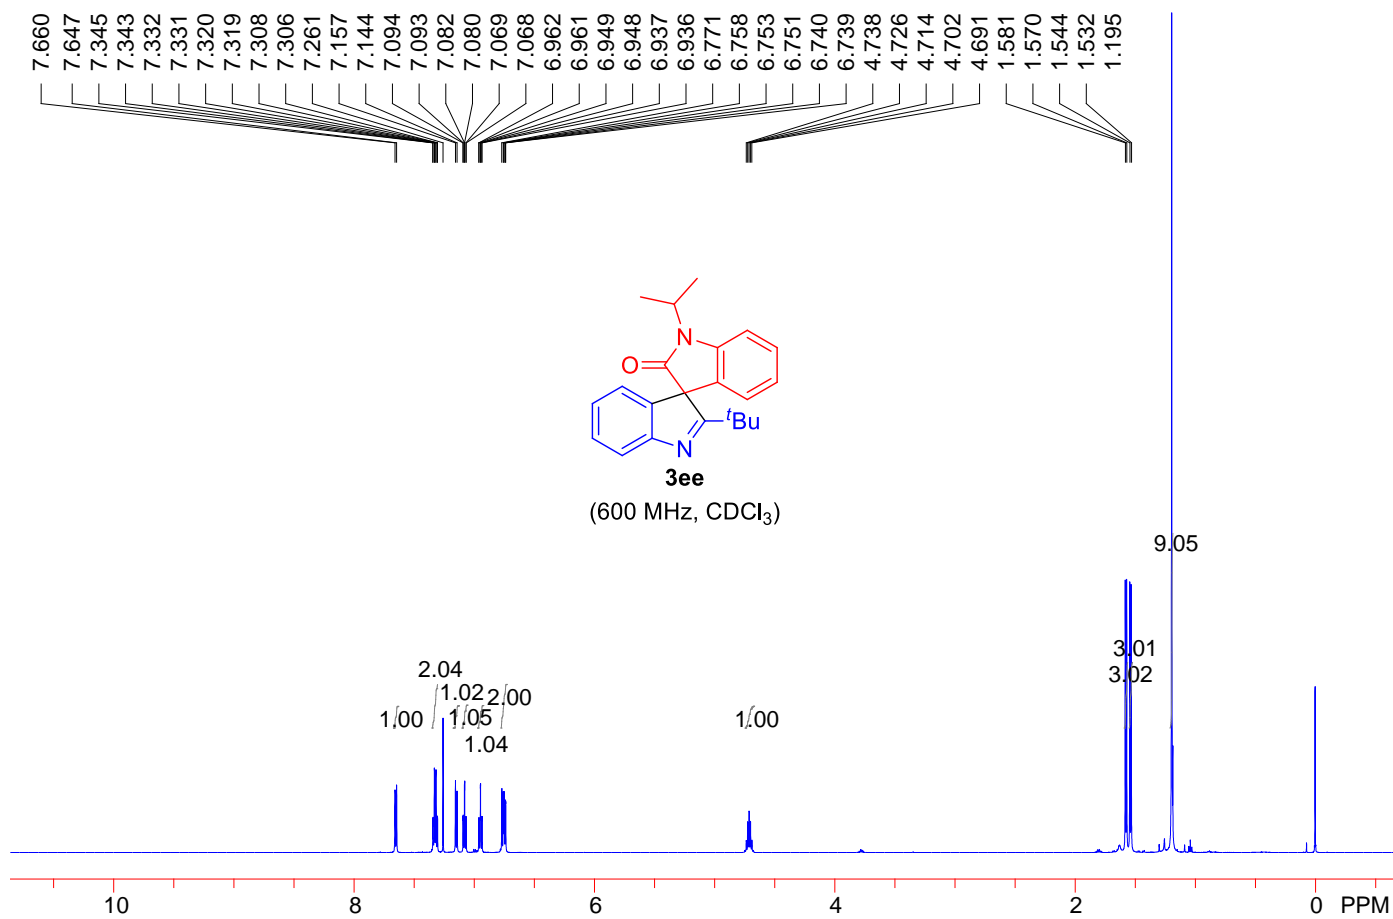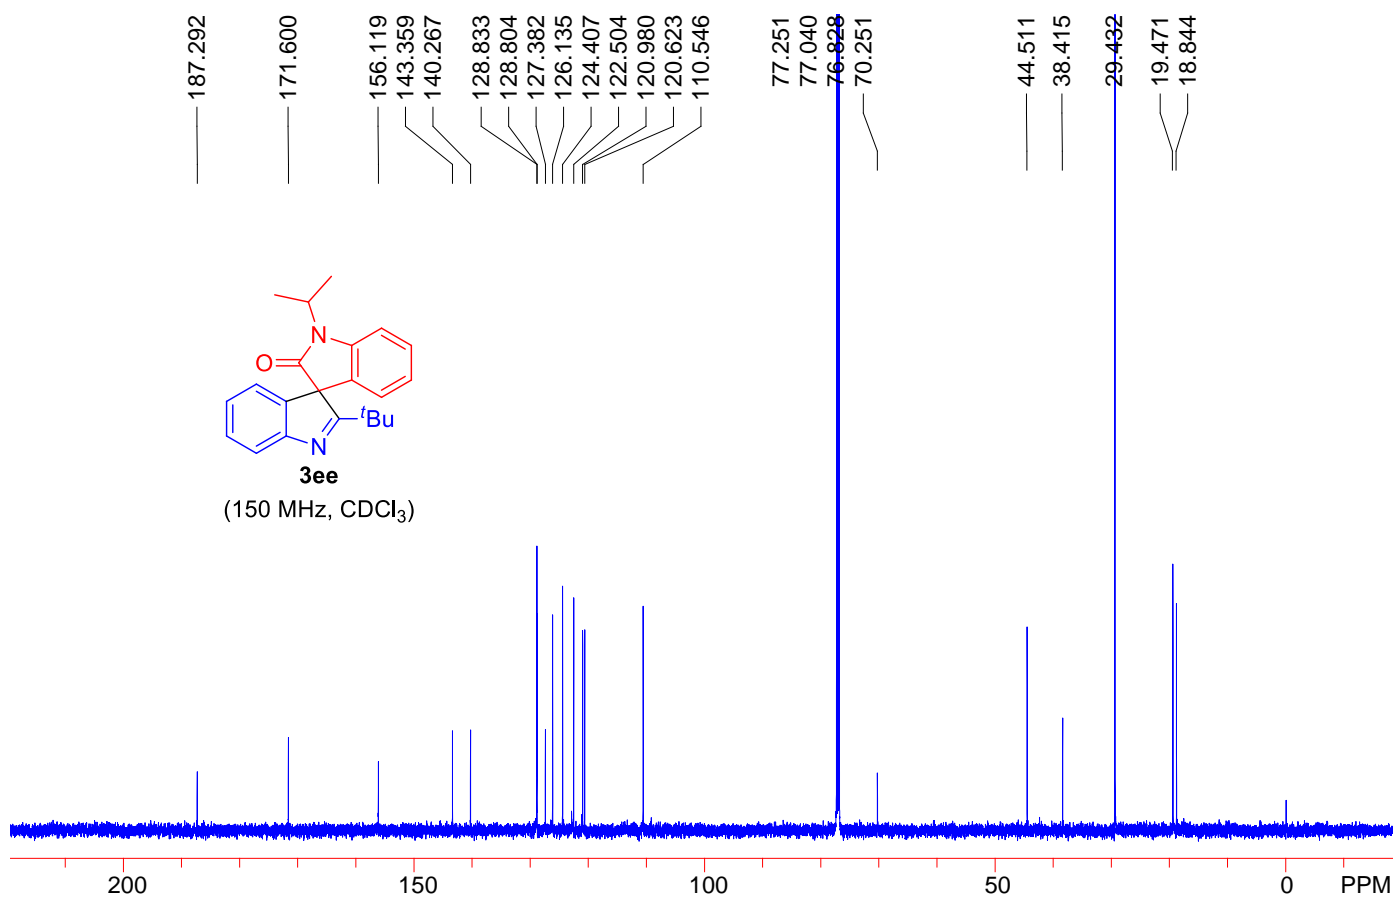

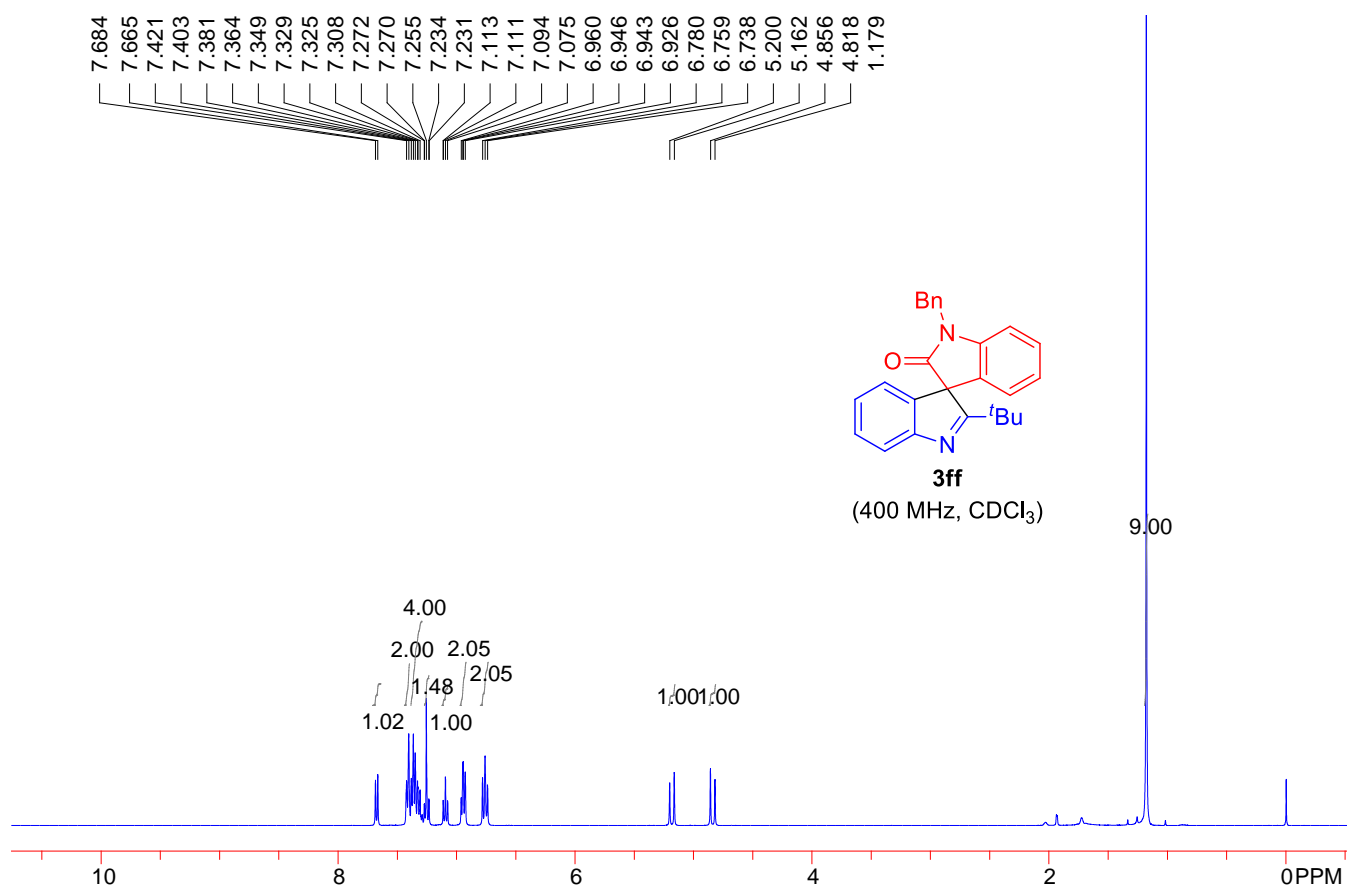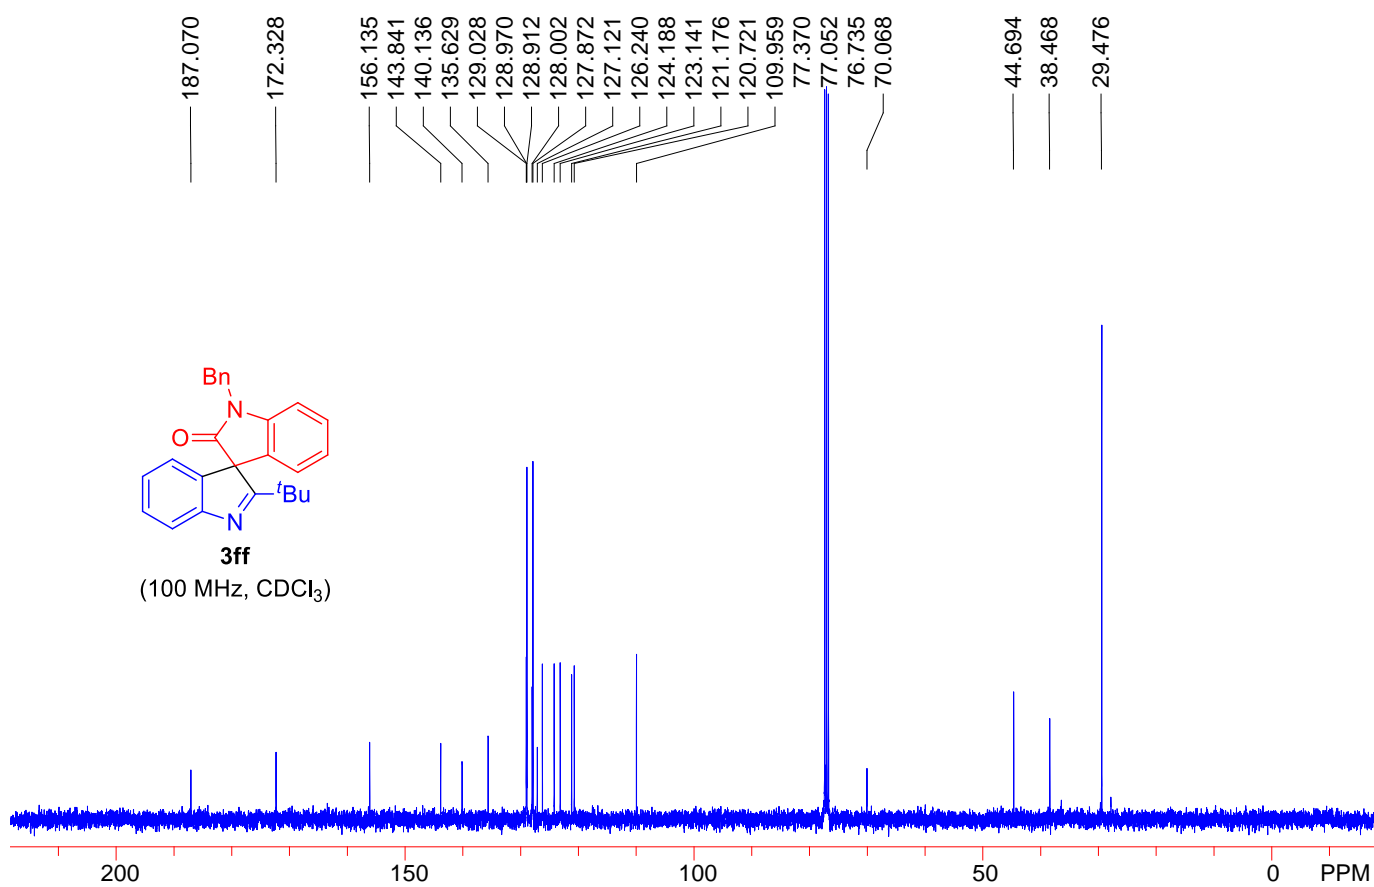

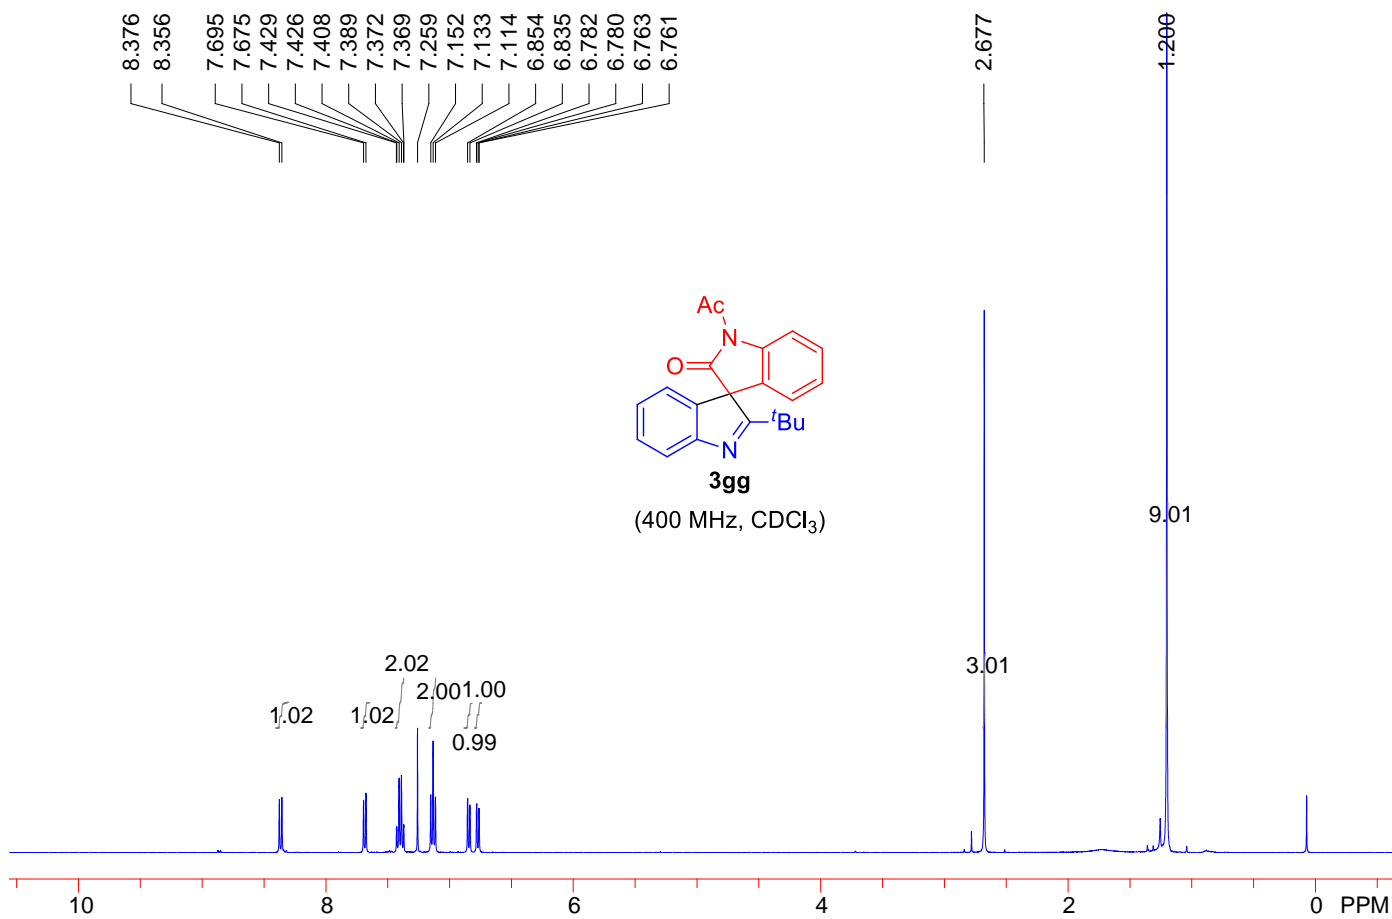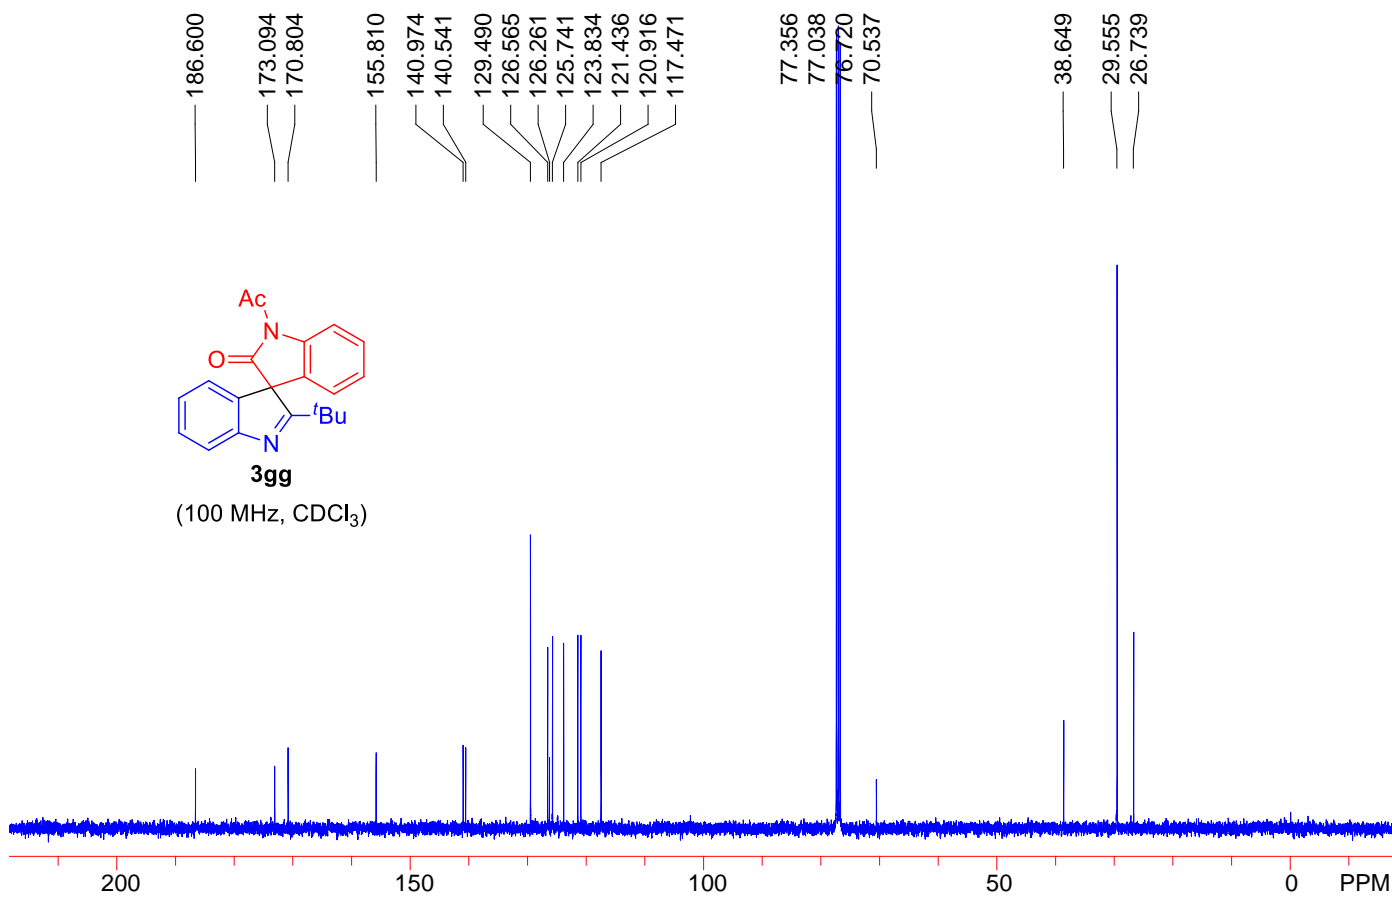

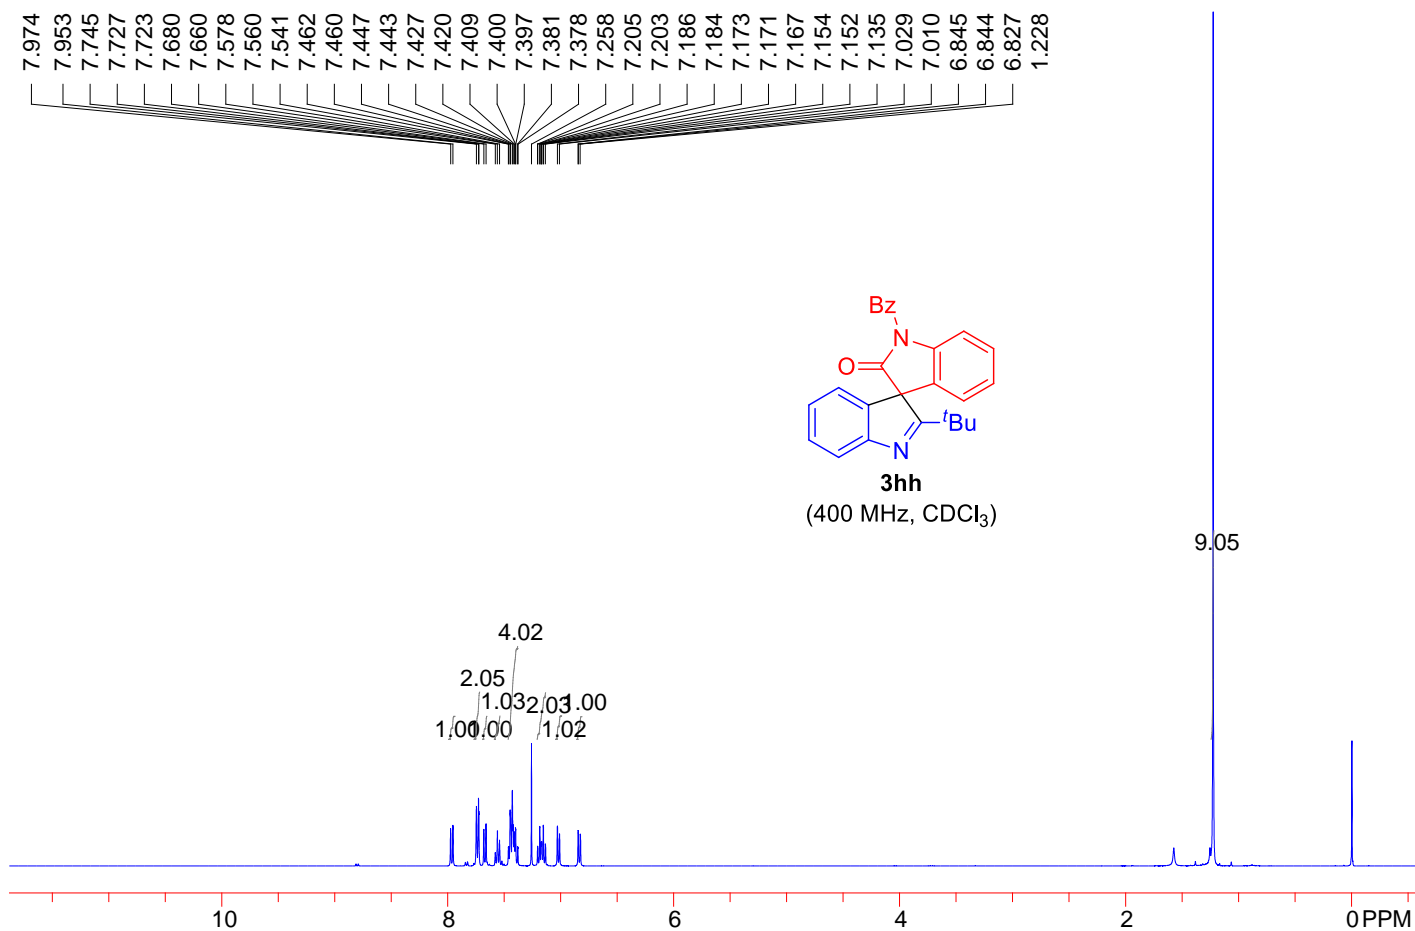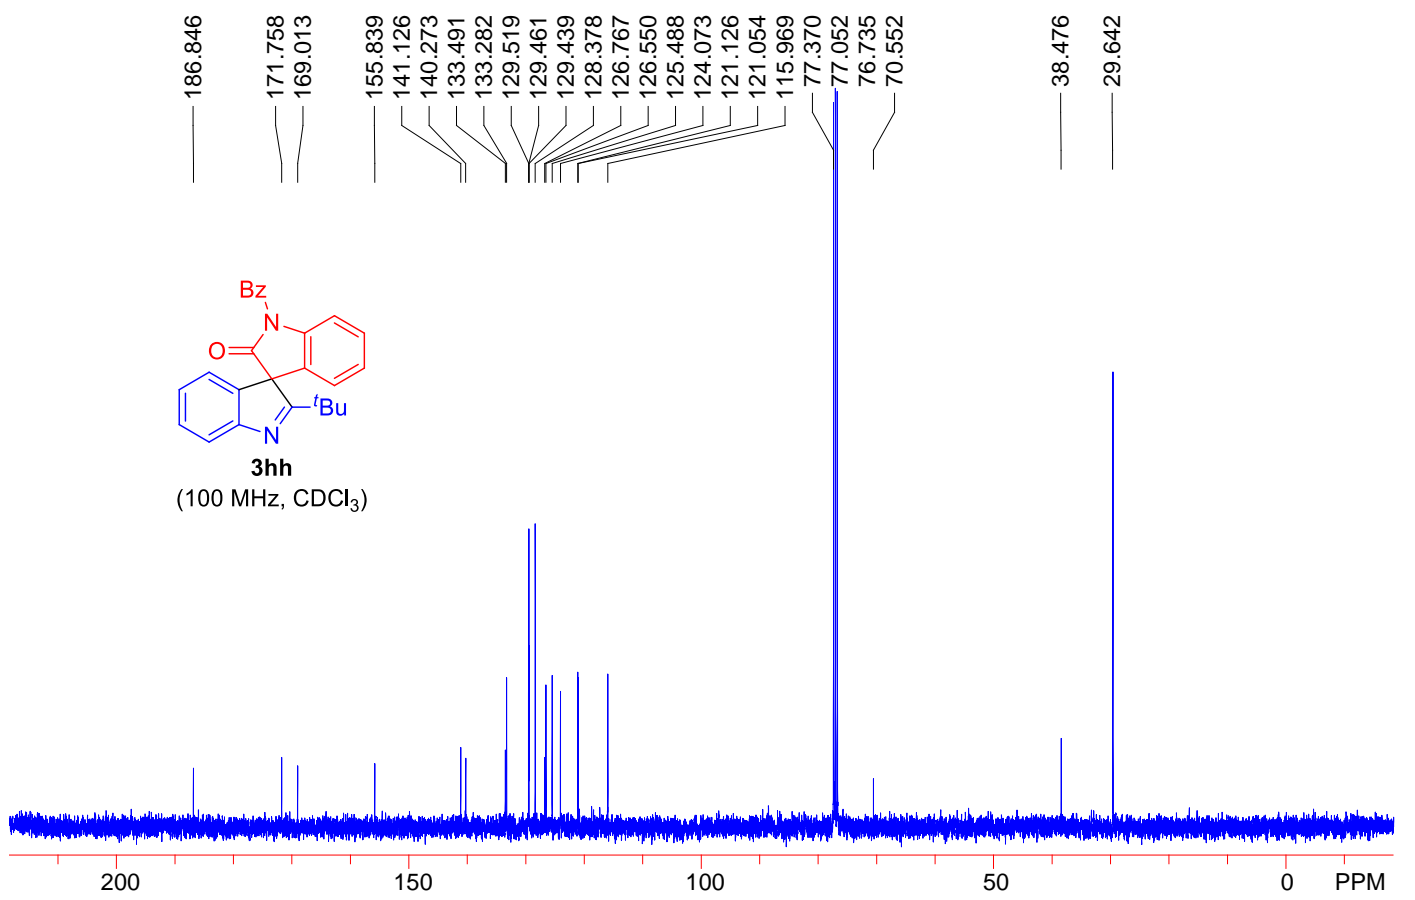

8.133  
8.112  
7.996  
7.976  
7.604  
7.585  
7.441  
7.422  
7.403  
7.340  
7.319  
7.313  
7.293  
7.260  
7.103  
7.084  
7.065  
7.009  
6.990  
6.971  
6.699  
6.680  
6.487  
6.469

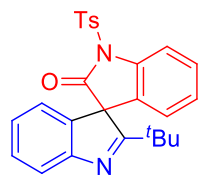

**3ii**  
(400 MHz, CDCl<sub>3</sub>)

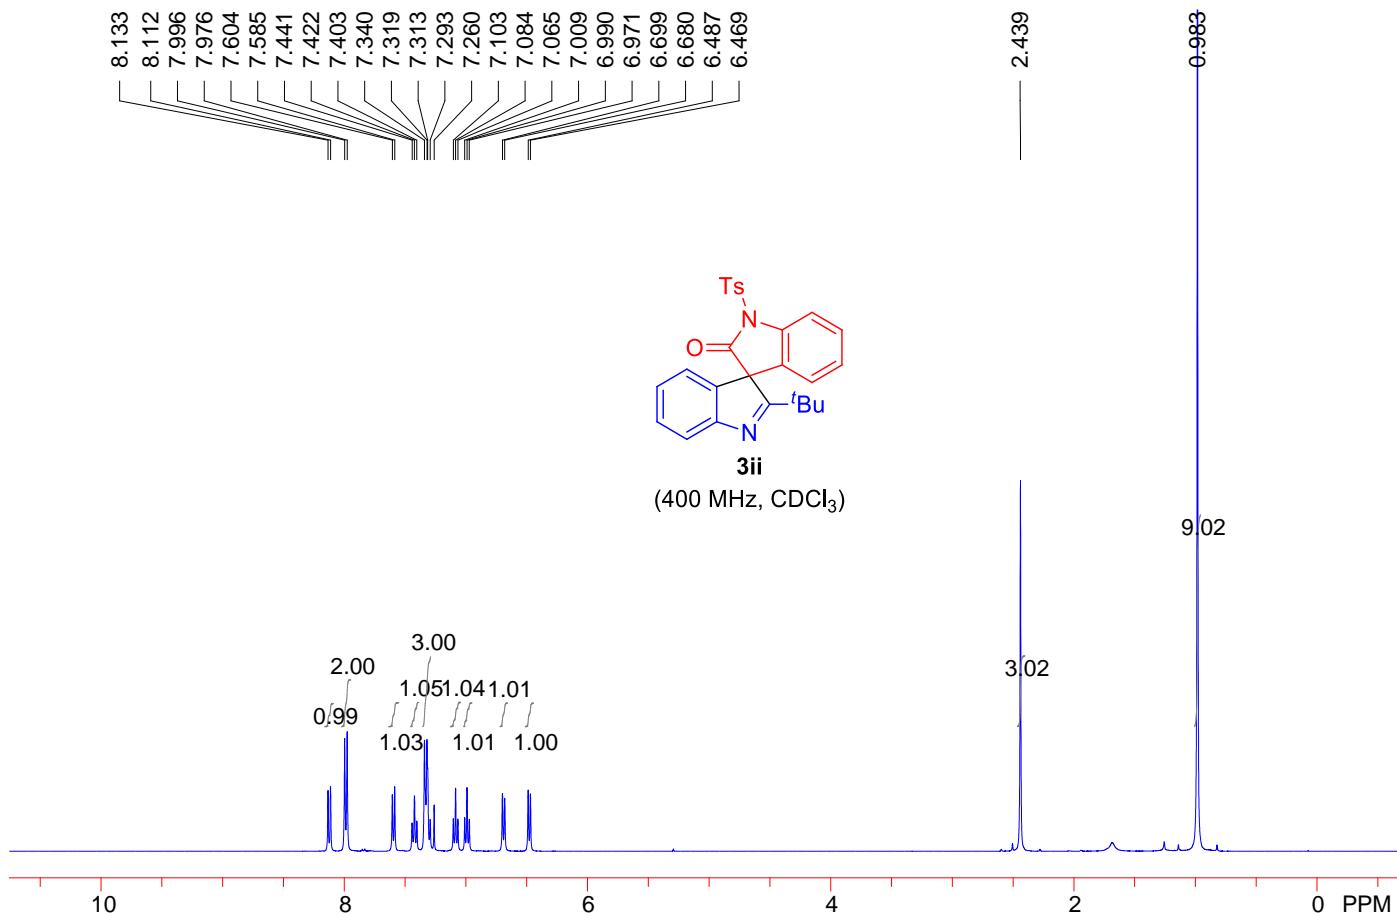

186.218  
170.197  
155.629  
140.107  
146.109  
139.941  
134.517  
129.808  
129.771  
129.410  
128.211  
126.442  
126.196  
125.329  
124.318  
121.306  
120.815  
114.661  
77.363  
77.045  
76.727  
69.895  
38.216  
29.375  
21.762

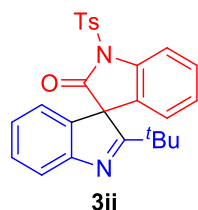

**3ii**  
(100 MHz, CDCl<sub>3</sub>)

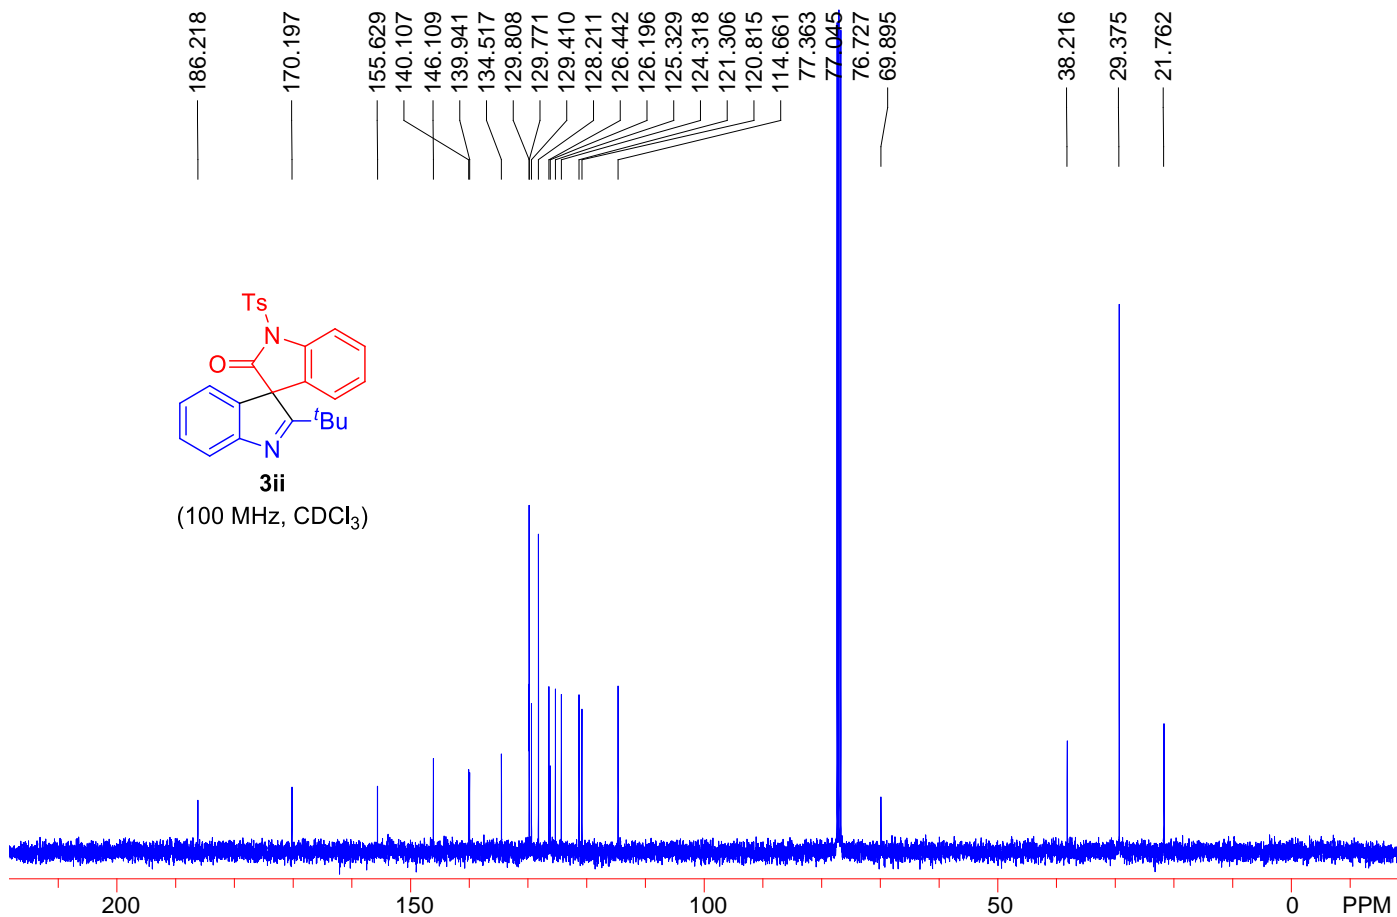

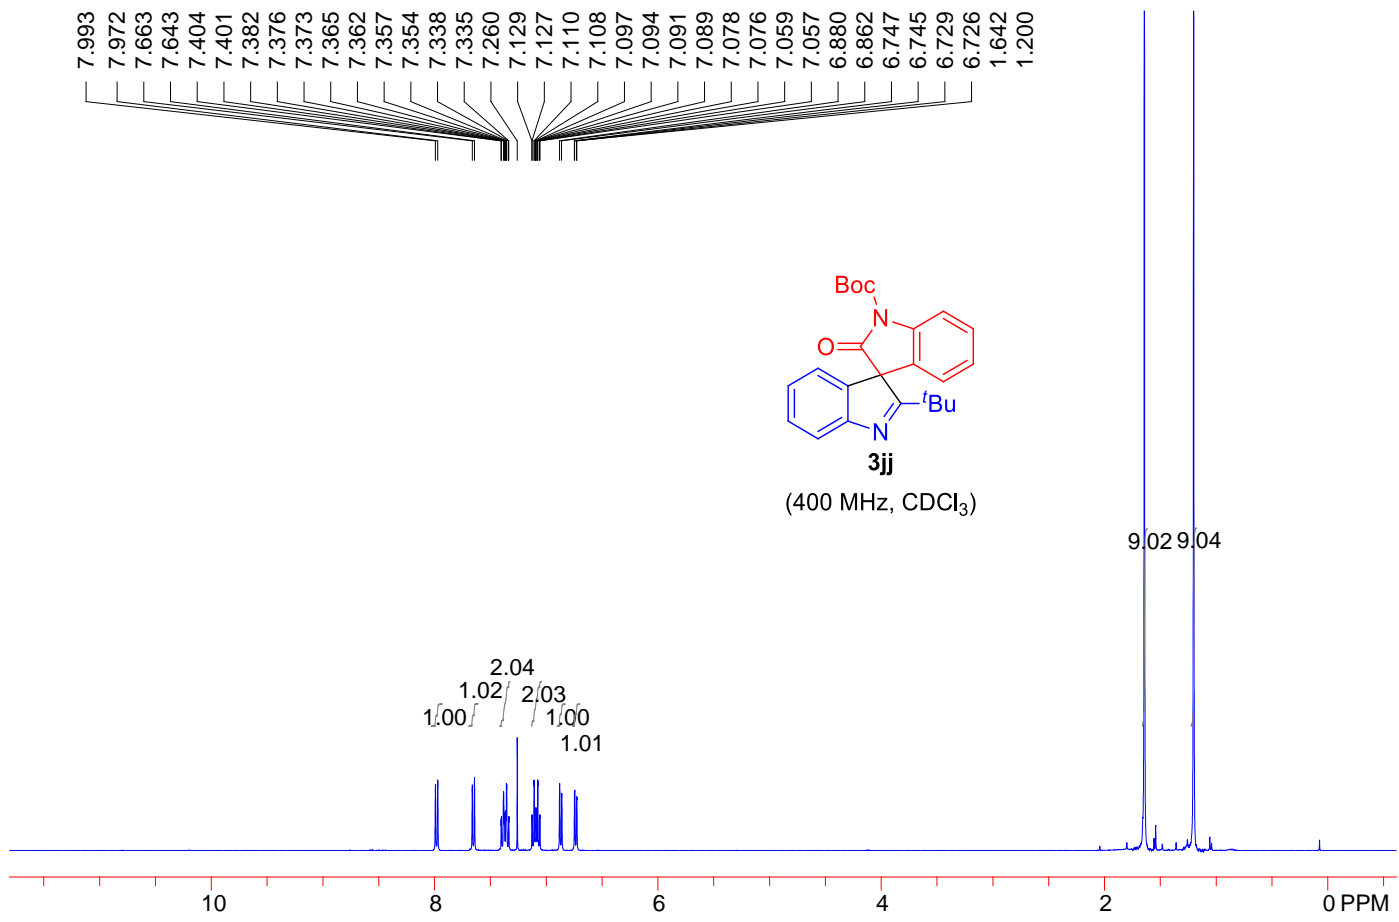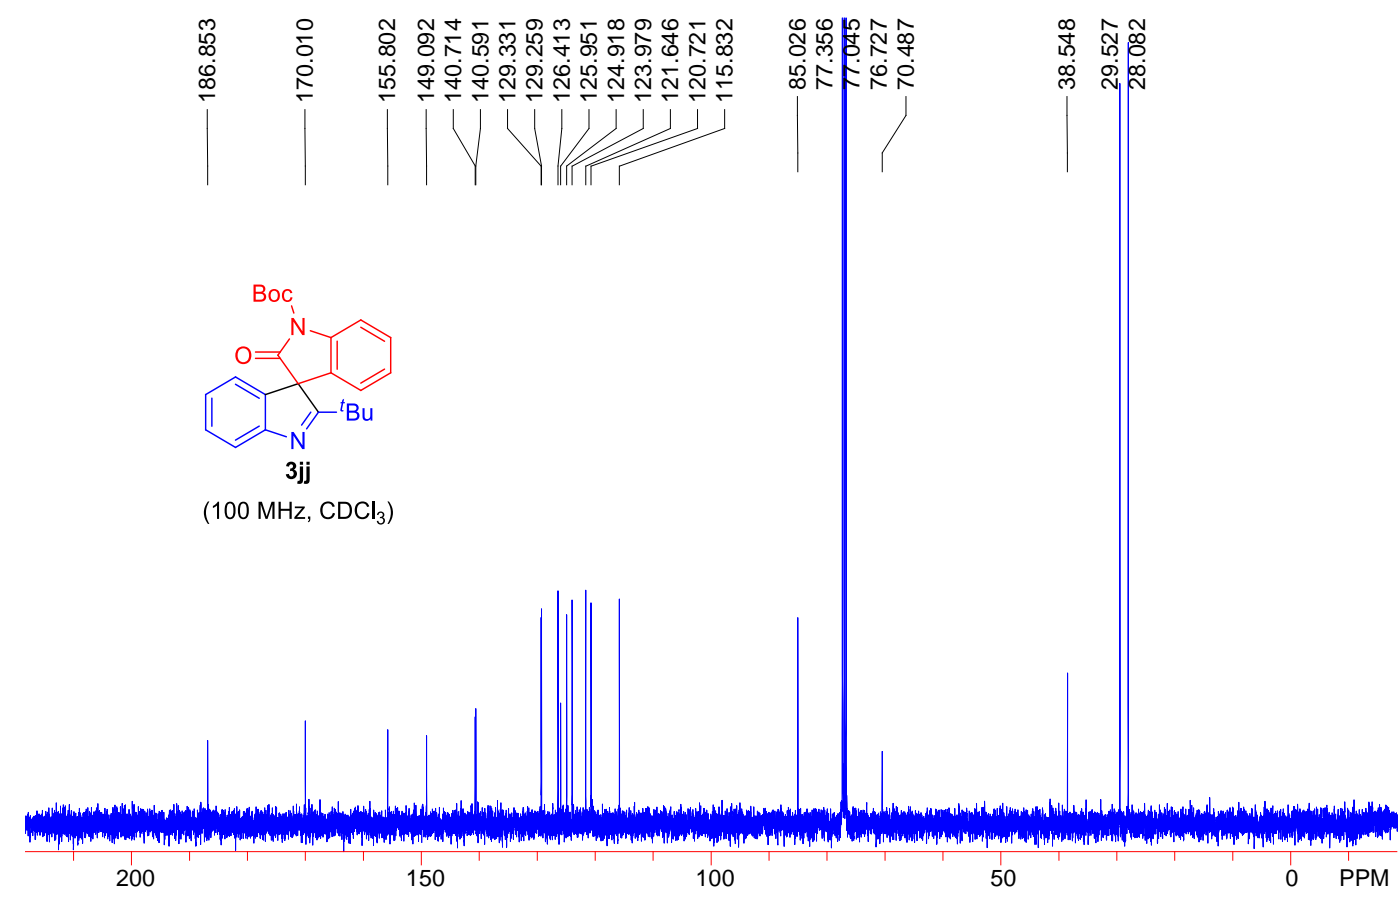



## V. Copies of NMR spectra of 4, 5, 6, 7, 8

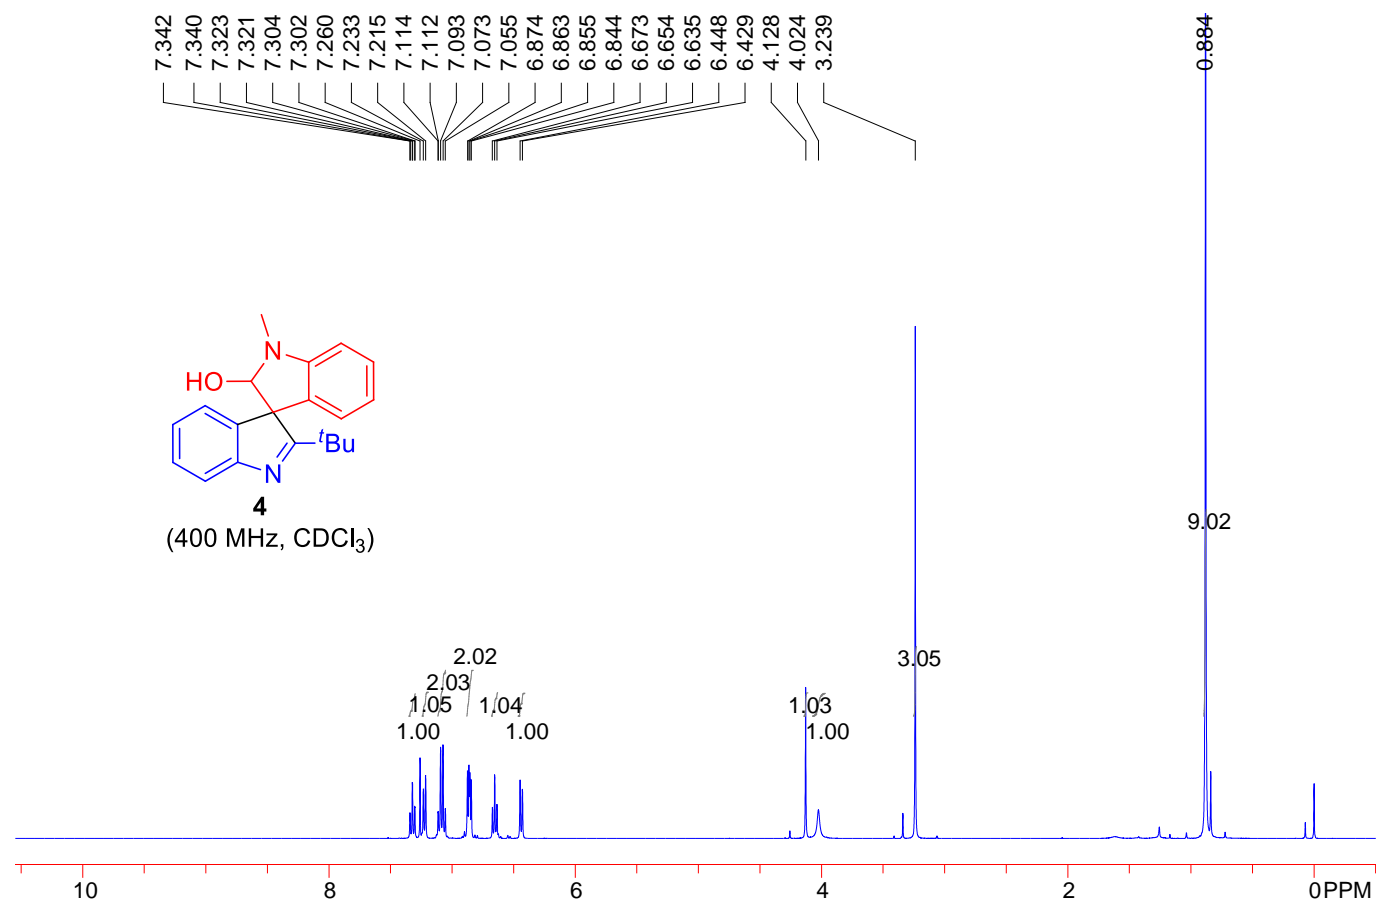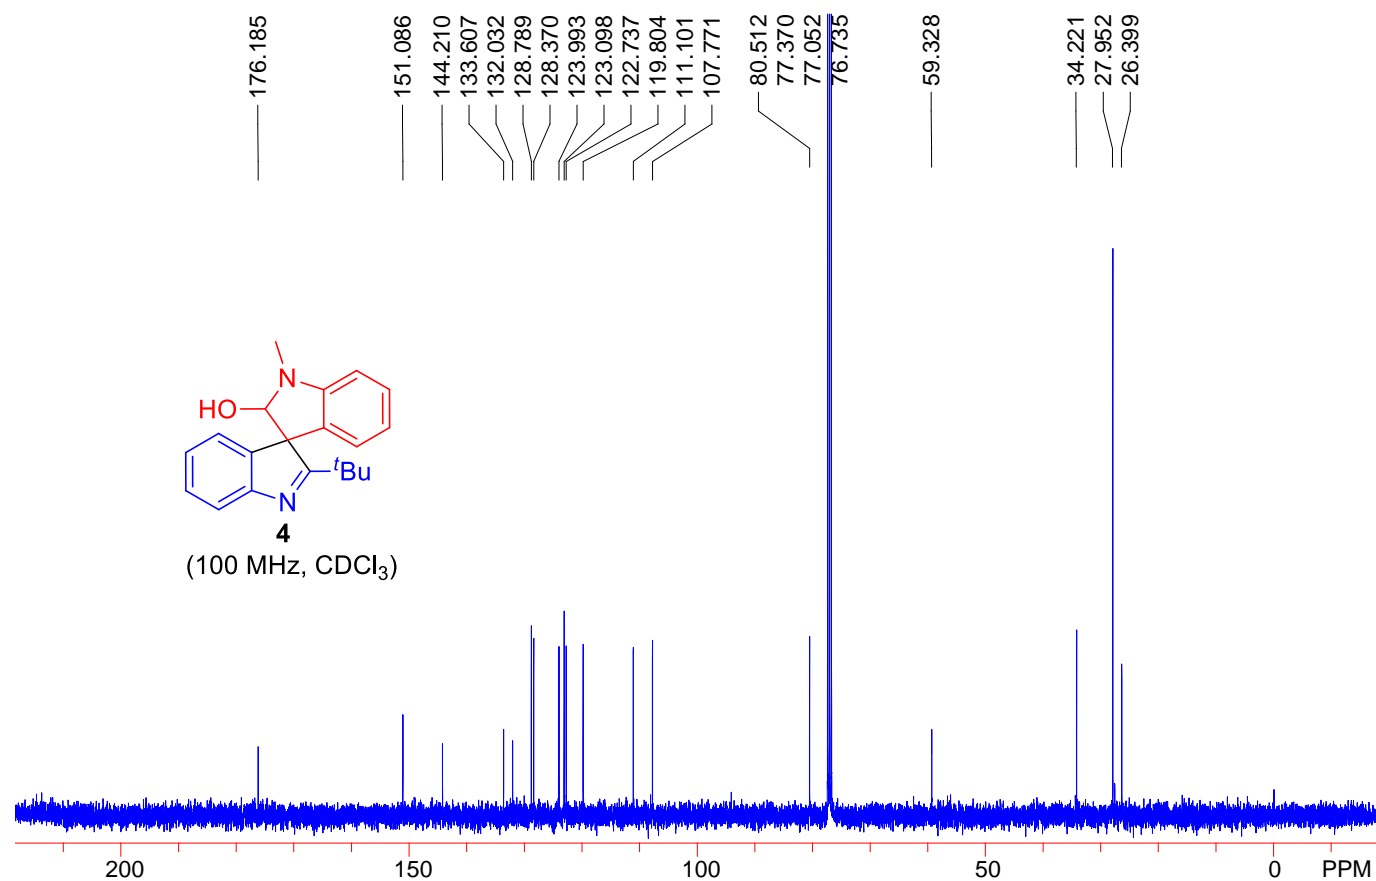

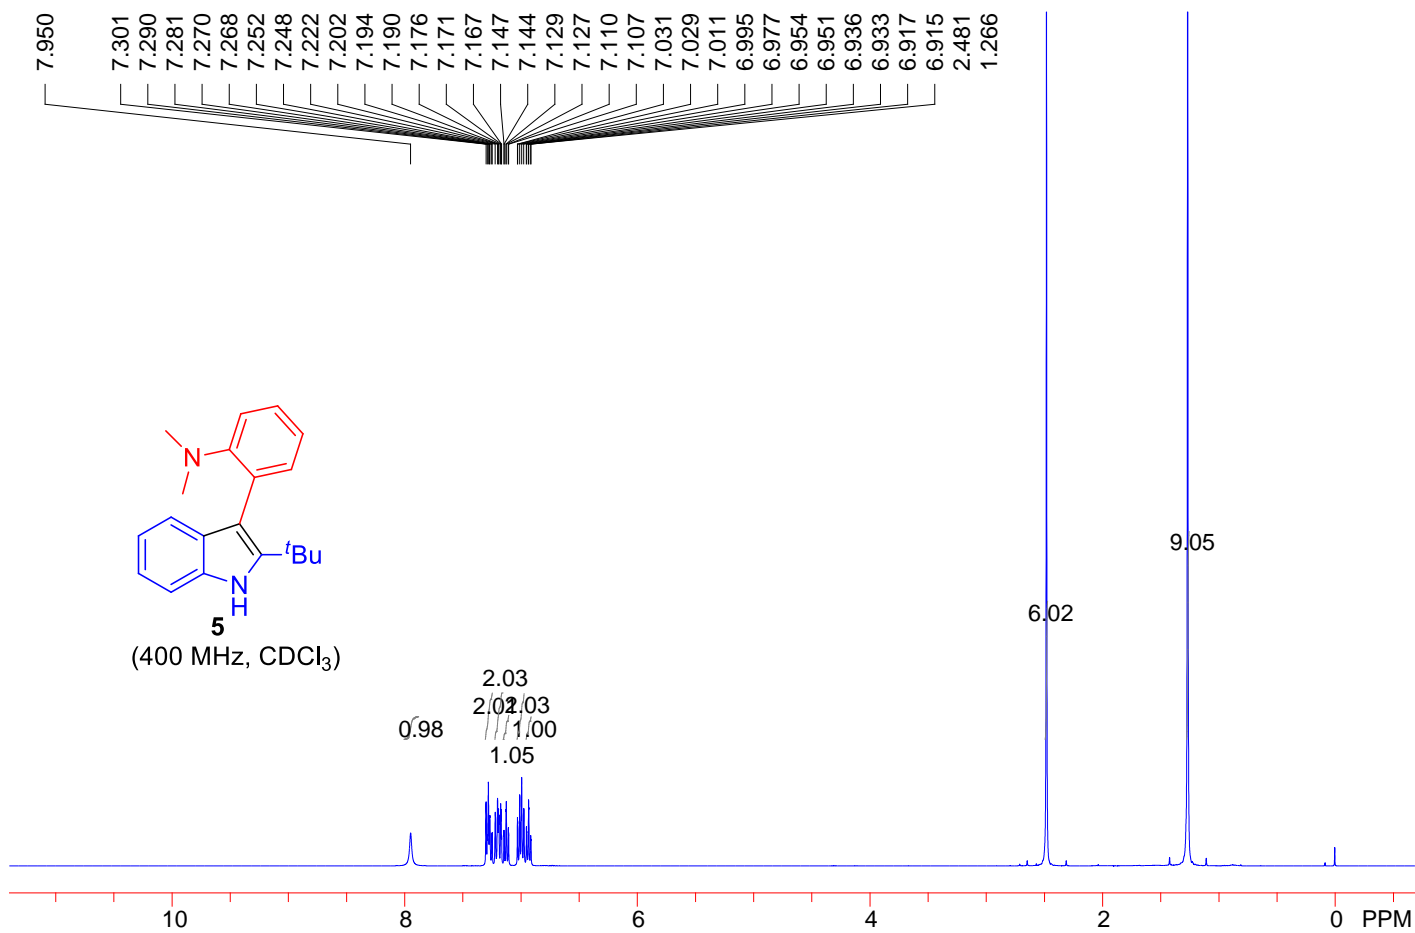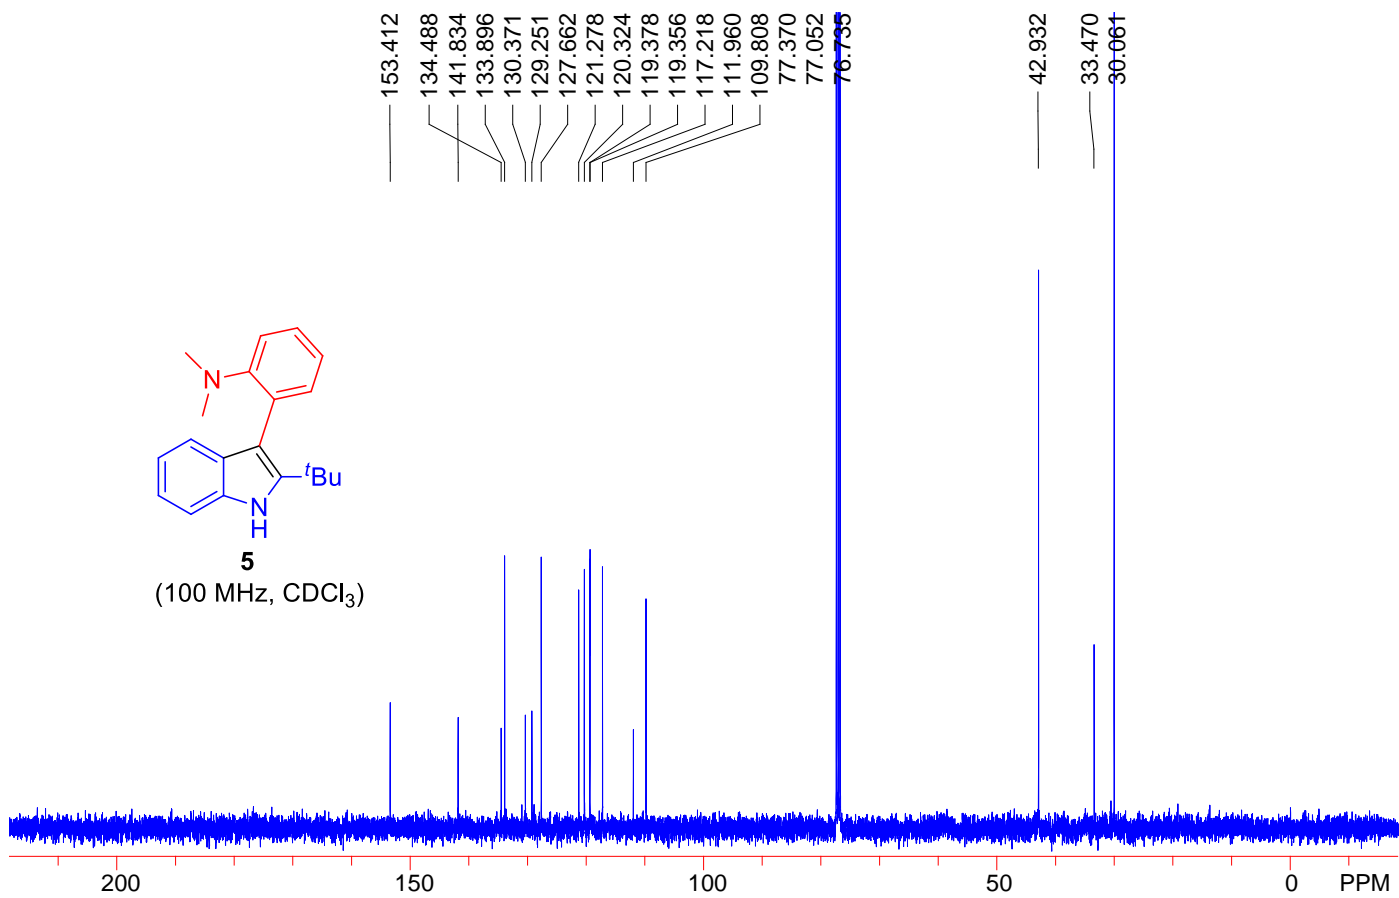

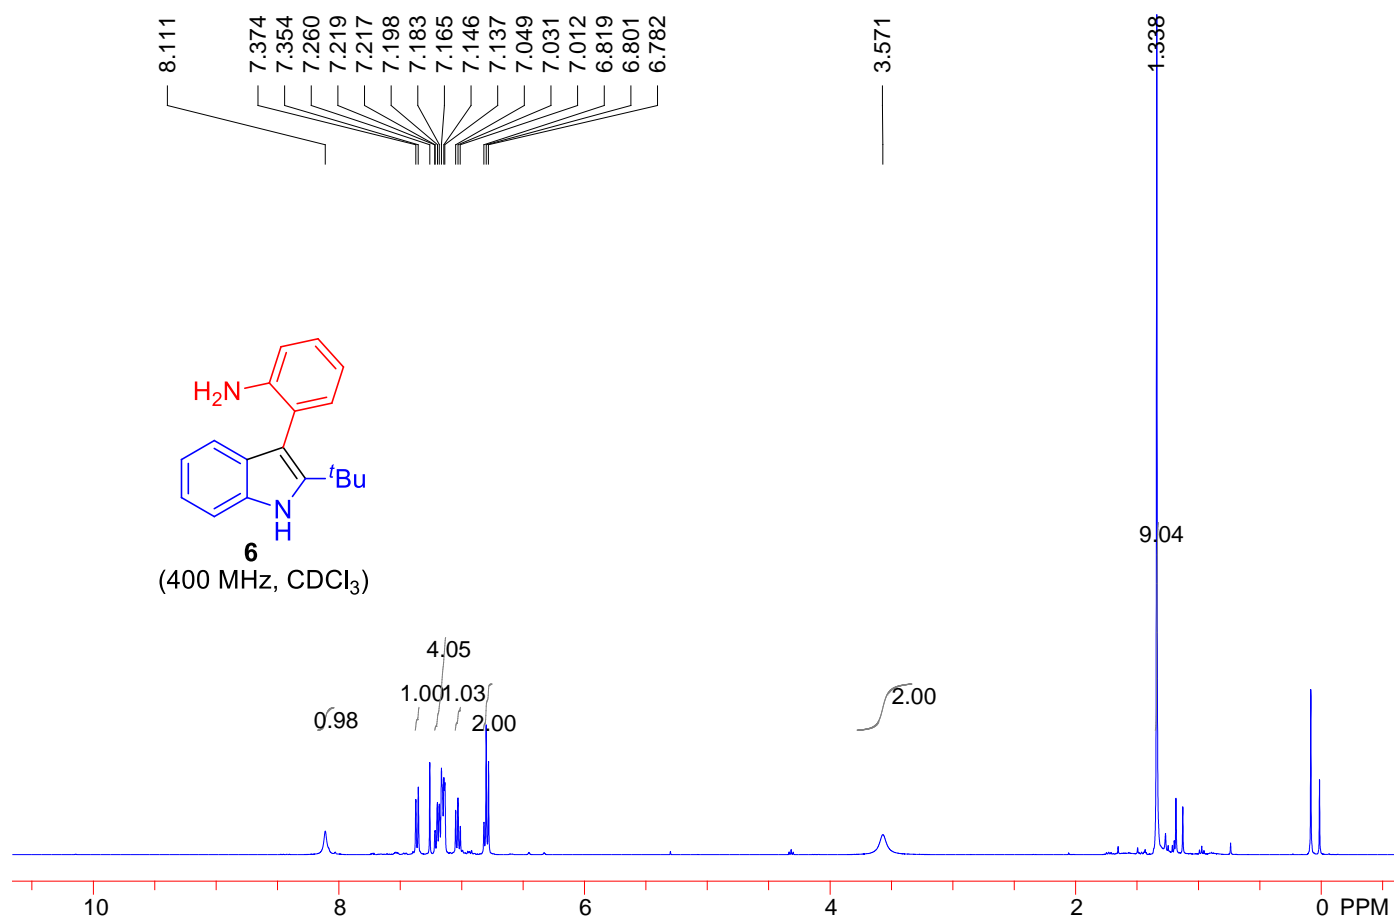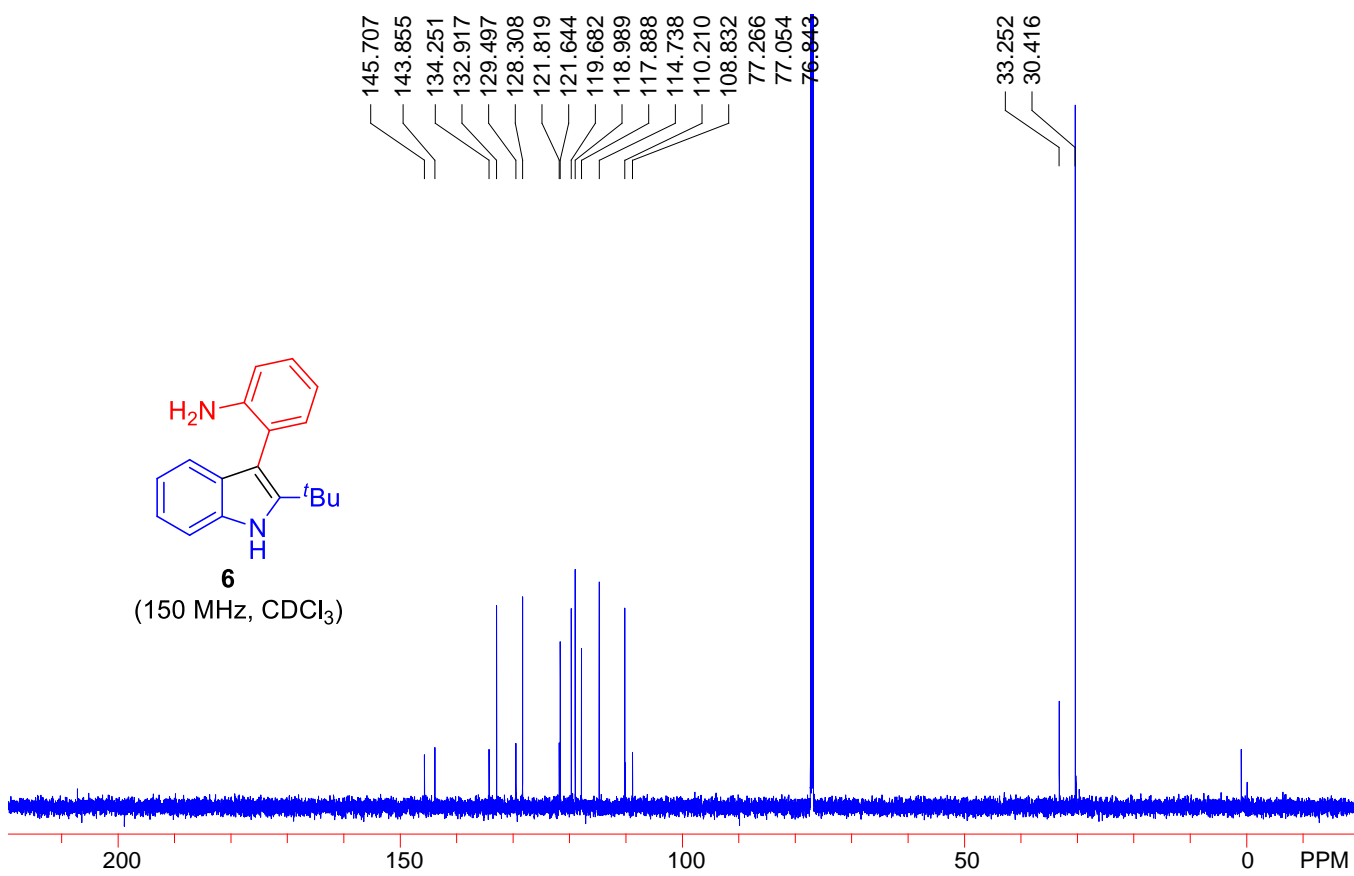

7.643  
7.623  
7.541  
7.537  
7.521  
7.517  
7.446  
7.442  
7.440  
7.436  
7.427  
7.421  
7.405  
7.402  
7.385  
7.382  
7.366  
7.363  
7.308  
7.301  
7.298  
7.296  
7.291  
7.284  
7.256  
7.032  
7.013  
6.994  
6.974  
6.972  
6.788  
6.770  
3.355

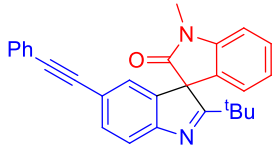

**7**  
(CDCl<sub>3</sub>, 400 MHz)

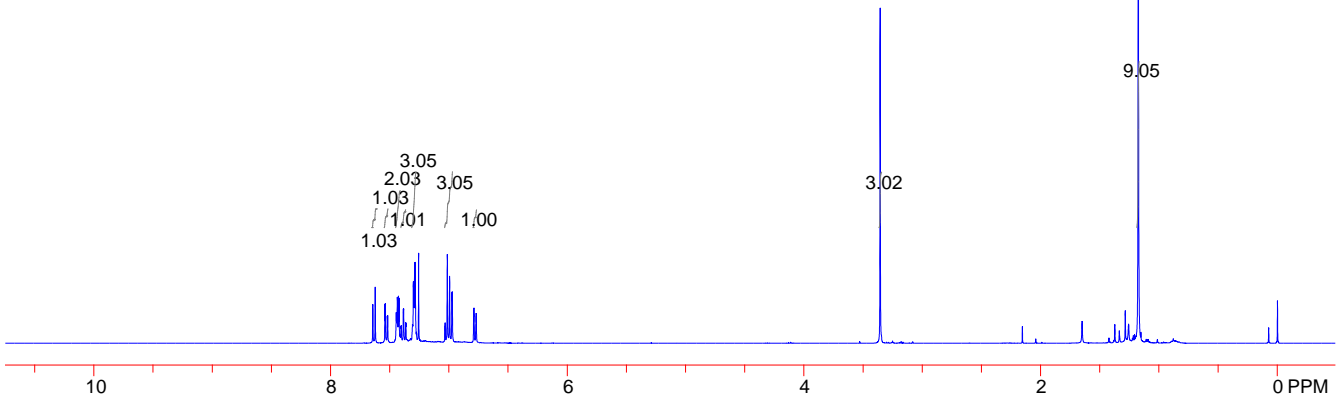

188.283  
171.765  
156.149  
144.694  
140.100  
132.755  
131.512  
129.410  
128.334  
128.255  
126.492  
124.643  
124.210  
123.329  
123.134  
121.017  
120.627  
109.064  
89.714  
89.353  
77.370  
77.052  
76.735  
70.025  
38.613  
29.339  
27.136

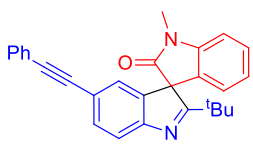

**7**  
(CDCl<sub>3</sub>, 100 MHz)

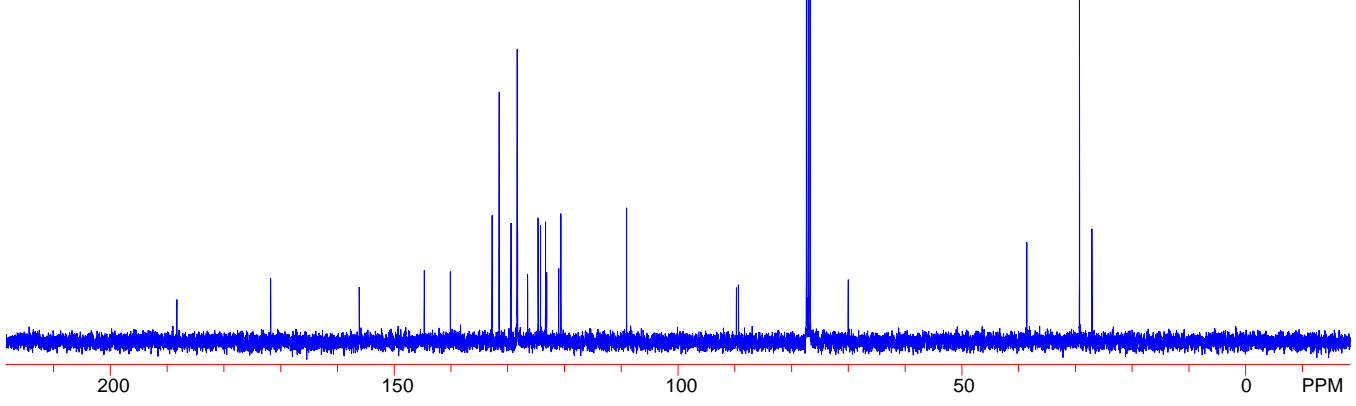

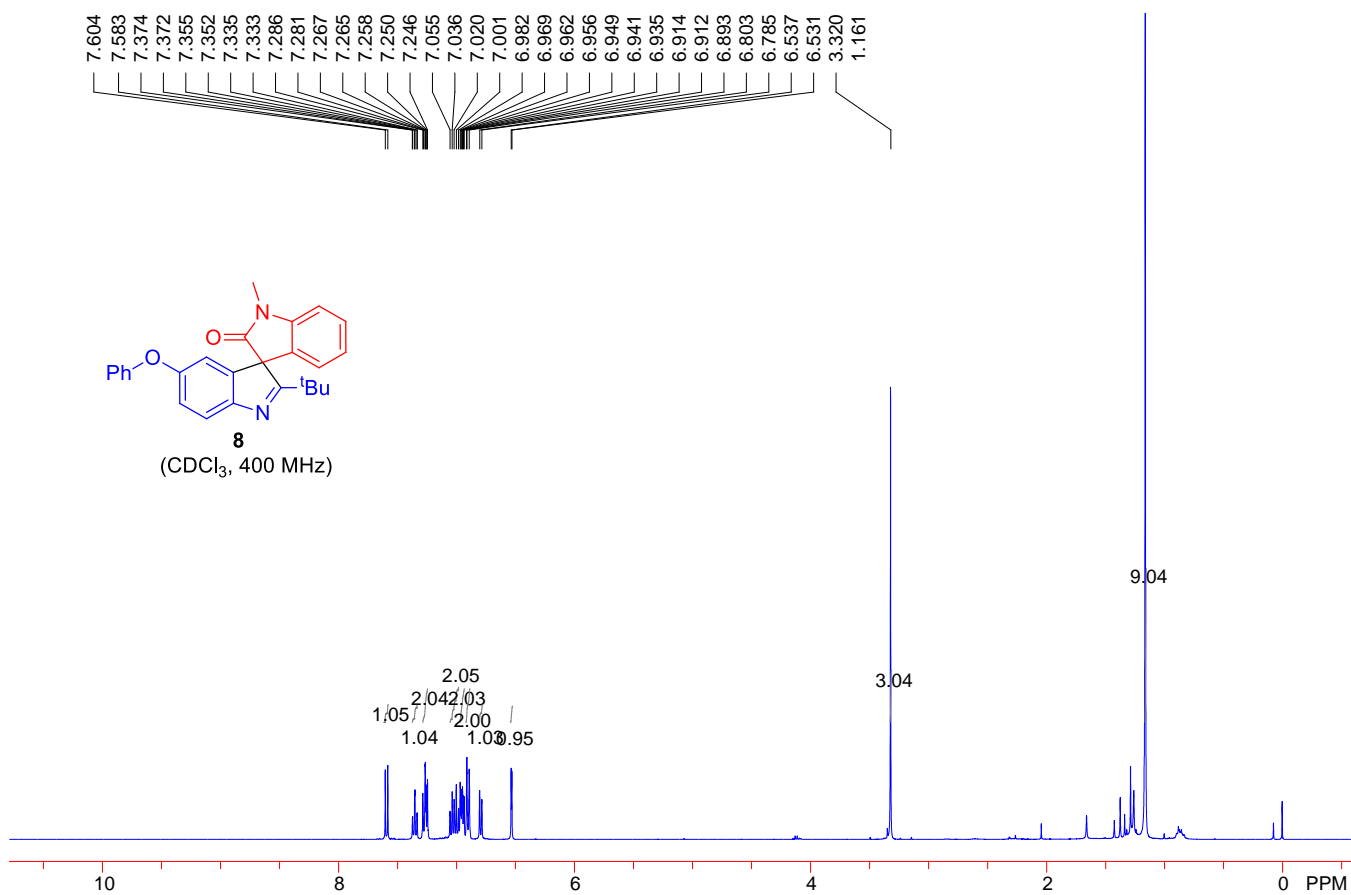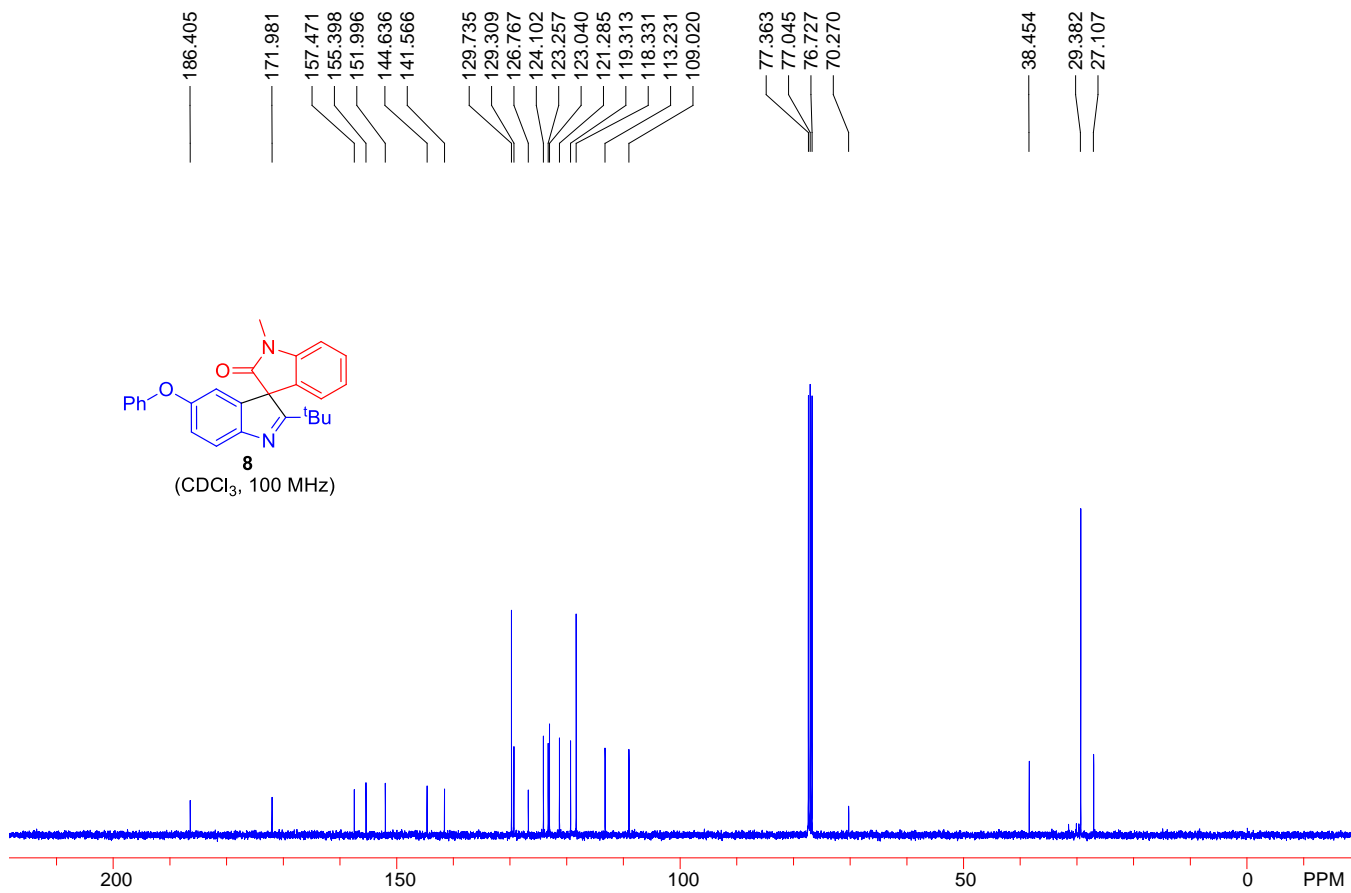

## VI. X-ray crystal structure and data of **3a**

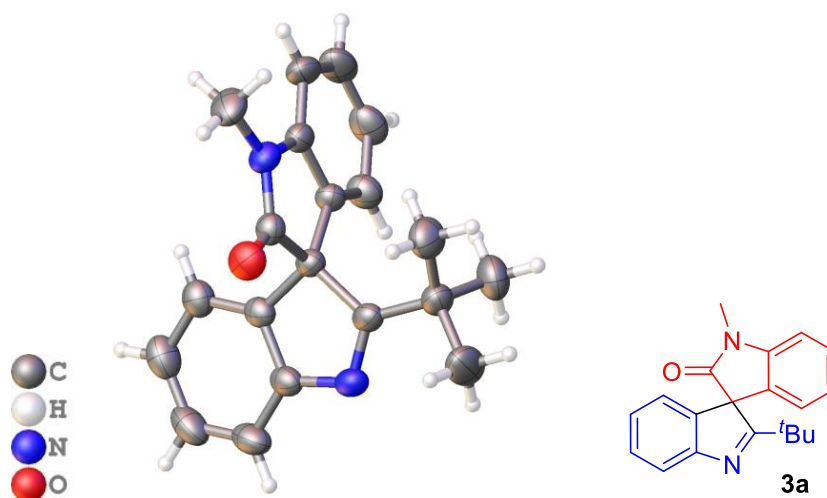

Fig. S4 X-ray crystal structure of **3a** with 50% ellipsoid probability

**X-ray structure determination.** Single crystals suitable for X-ray diffraction were obtained by slow evaporation of the solvent from a methanol solution of **3a**. Crystal data collection and refinement parameters of **3a** are summarized in Table S1. Intensity data were collected at 293 K on a SuperNova Dual diffractometer using mirror-monochromated Cu K $\alpha$  radiation,  $\lambda = 1.54184$  Å. The data were corrected for decay, Lorentz, and polarization effects as well as absorption and beam corrections based on the multi-scan technique. Using Olex2, the structure was solved with the SHELXS structure solution program using Direct Methods and refined with the SHELXL refinement package using Least Squares minimisation. Nonhydrogen atoms were refined with anisotropic displacement parameters. The H-atoms were either located or calculated and subsequently treated with a riding model.

**Table S1** Crystallographic data and structure refinement results of **3a**

|                   |                                                     |
|-------------------|-----------------------------------------------------|
| Empirical formula | 2(C <sub>20</sub> H <sub>20</sub> N <sub>2</sub> O) |
| Formula weight    | 608.76                                              |
| Temp, K           | 293 (2)                                             |
| Crystal system    | monoclinic                                          |
| Space group       | P2 <sub>1</sub> /c                                  |
| <i>a</i> , Å      | 16.8519(3)                                          |
| <i>b</i> , Å      | 8.94750(10)                                         |

|                                        |                |
|----------------------------------------|----------------|
| $c$ , Å                                | 22.5301(4)     |
| $\alpha$ (°)                           | 90             |
| $\beta$ (°)                            | 98.216(2)      |
| $\gamma$ (°)                           | 90             |
| Volume, Å <sup>3</sup>                 | 3362.27(9)     |
| $Z$                                    | 4              |
| $d_{\text{calc}}$ , g cm <sup>-3</sup> | 1.203          |
| $\lambda$ , Å                          | 1.54184        |
| $\mu$ , mm <sup>-1</sup>               | 0.586          |
| No. of data collected                  | 15329          |
| No. of unique data                     | 6400           |
| $R_{\text{int}}$                       | 0.0245         |
| Goodness-of-fit on $F^2$               | 1.044          |
| $R_1$ , $wR_2$ ( $I > 2\sigma(I)$ )    | 0.0531, 0.1408 |
| $R_1$ , $wR_2$ (all data)              | 0.0608, 0.1486 |

## VII. X-ray crystal structure and data of **3k**

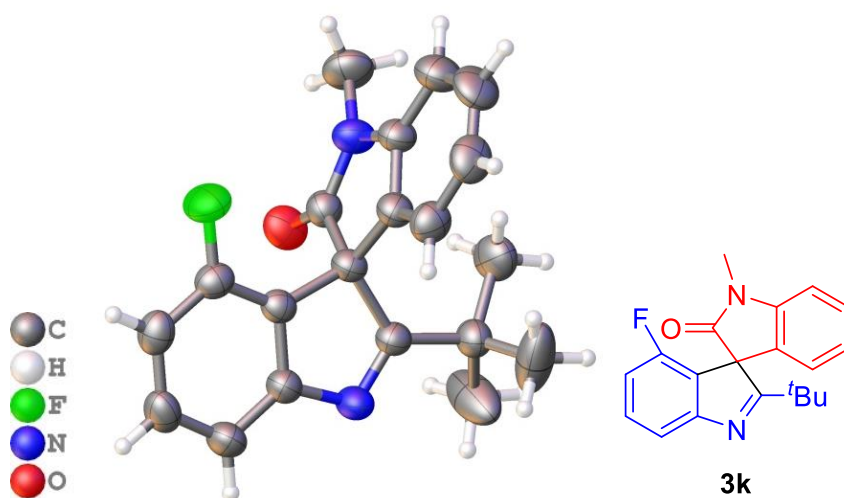

Fig. S5 X-ray crystal structure of **3k** with 50% ellipsoid probability

**X-ray structure determination.** Single crystals suitable for X-ray diffraction were obtained by slow evaporation of the solvent from a petroleum ether/dichloromethane (1:1) solution of **3k**. Crystal data collection and refinement parameters of **3k** are summarized in Table S1. Intensity data were collected at 293 K on a SuperNova Dual diffractometer using mirror-monochromated Cu K $\alpha$  radiation,  $\lambda = 1.54184$  Å. The data were corrected for decay, Lorentz, and polarization effects as well as absorption and beam corrections based on the multi-scan technique. Using Olex2, the structure was solved with the SHELXS structure solution program using Direct Methods and refined with the SHELXL refinement package using Least Squares minimisation. Nonhydrogen atoms were refined with anisotropic displacement parameters. The H-atoms were either located or calculated and subsequently treated with a riding model.

**Table S2** Crystallographic data and structure refinement results of **3k**

|                   |                                                   |
|-------------------|---------------------------------------------------|
| Empirical formula | C <sub>20</sub> H <sub>19</sub> FN <sub>2</sub> O |
| Formula weight    | 322.37                                            |
| Temp, K           | 293 (2)                                           |
| Crystal system    | monoclinic                                        |
| Space group       | P2 <sub>1</sub> /n                                |
| <i>a</i> , Å      | 11.2828(2)                                        |
| <i>b</i> , Å      | 12.1461(3)                                        |



|                                        |                |
|----------------------------------------|----------------|
| $c$ , Å                                | 12.2864(2)     |
| $\alpha$ (°)                           | 90             |
| $\beta$ (°)                            | 95.877(2)      |
| $\gamma$ (°)                           | 90             |
| Volume, Å <sup>3</sup>                 | 1674.90(6)     |
| $Z$                                    | 4              |
| $d_{\text{calc}}$ , g cm <sup>-3</sup> | 1.278          |
| $\lambda$ , Å                          | 1.54184        |
| $\mu$ , mm <sup>-1</sup>               | 0.707          |
| No. of data collected                  | 6680           |
| No. of unique data                     | 3184           |
| $R_{\text{int}}$                       | 0.0200         |
| Goodness-of-fit on $F^2$               | 1.073          |
| $R_1$ , $wR_2$ ( $I > 2\sigma(I)$ )    | 0.0550, 0.1578 |
| $R_1$ , $wR_2$ (all data)              | 0.0643, 0.1661 |

## VIII. X-ray crystal structure and data of **6**

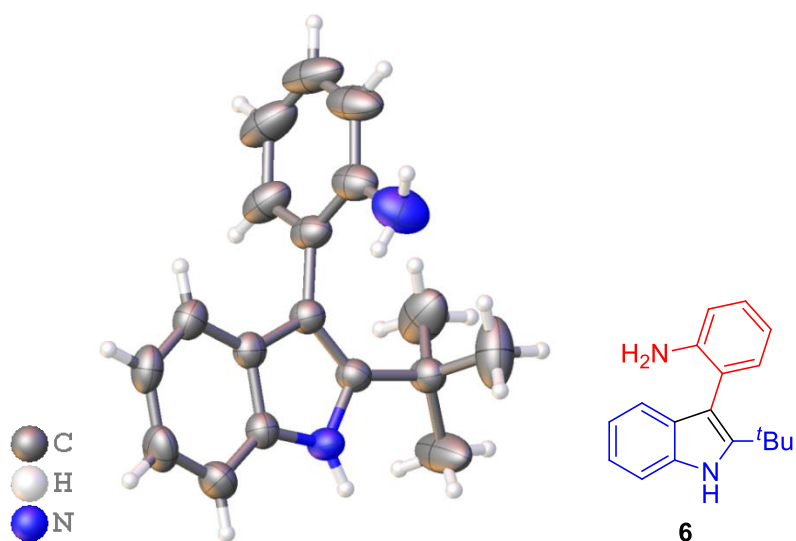

Fig. S6 X-ray crystal structure of **6** with 50% ellipsoid probability

**X-ray structure determination.** Single crystals suitable for X-ray diffraction were obtained by slow evaporation of the solvent from an dichloromethane solution of **6**. Crystal data collection and refinement parameters of **6** are summarized in Table S2. Intensity data were collected at 293 K on a SuperNova Dual diffractometer using mirror-monochromated Mo K $\alpha$  radiation,  $\lambda = 0.71073$  Å. The data were corrected for decay, Lorentz, and polarization effects as well as absorption and beam corrections based on the multi-scan technique. Using Olex2, the structure was solved with the SHELXS structure solution program using Direct Methods and refined with the SHELXL refinement package using Least Squares minimisation. Nonhydrogen atoms were refined with anisotropic displacement parameters. The H-atoms were either located or calculated and subsequently treated with a riding model.

**Table S3** Crystallographic data and structure refinement results of **6**

|                   |                                                |
|-------------------|------------------------------------------------|
| Empirical formula | C <sub>18</sub> H <sub>20</sub> N <sub>2</sub> |
| Formula weight    | 264.36                                         |
| Temp, K           | 293 (2)                                        |
| Crystal system    | monoclinic                                     |
| Space group       | P2 <sub>1</sub> /c                             |
| <i>a</i> , Å      | 9.3300(8)                                      |

|                                        |                |
|----------------------------------------|----------------|
| $b$ , Å                                | 9.9923(6)      |
| $c$ , Å                                | 16.3551(9)     |
| $\alpha$ (°)                           | 90             |
| $\beta$ (°)                            | 103.250(7)     |
| $\gamma$ (°)                           | 90             |
| Volume, Å <sup>3</sup>                 | 1484.17(18)    |
| $Z$                                    | 4              |
| $d_{\text{calc}}$ , g cm <sup>-3</sup> | 1.183          |
| $\lambda$ , Å                          | 0.71073        |
| $\mu$ , mm <sup>-1</sup>               | 0.070          |
| No. of data collected                  | 9252           |
| No. of unique data                     | 3472           |
| $R_{\text{int}}$                       | 0.0228         |
| Goodness-of-fit on $F^2$               | 1.083          |
| $R_1$ , $wR_2$ ( $I > 2\sigma(I)$ )    | 0.0657, 0.1756 |
| $R_1$ , $wR_2$ (all data)              | 0.0926, 0.1935 |

## IX. References

- (1) G. Brasche and S. L. Buchwald, C–H Functionalization/C–N Bond Formation: Copper-Catalyzed Synthesis of Benzimidazoles from Amidines, *Angew. Chem. Int. Ed.*, 2008, **47**, 1932-1934.
- (2) A. C. S. Reddy, P. M. Reddy and P. Anbarasan, Diastereoselective Palladium Catalyzed Carbenylative Amination of ortho-Vinylnilines with 3-Diazoindolin-2-ones, *Adv. Synth. Catal.*, 2020, **362**, 801-806.
- (3) K.-I. Fujita, Y. Takahashi, M. Owaki, K. Yamamoto and R. Yamaguchi, Synthesis of Five-, Six-, and Seven-Membered Ring Lactams by Cp\*Rh Complex-Catalyzed Oxidative *N*-Heterocyclization of Amino Alcohols, *Org Lett.*, 2004, **6**, 2785-2788.
- (4) B. T. Cho and S. K. Kang, Direct and Indirect Reductive Amination of Aldehydes and Ketones with Solid Acid-Activated Sodium Borohydride under Solvent-Free Conditions, *Tetrahedron*, 2005, **61**, 5725-5734.
- (5) Z.-J. Zhang, Y.-H. Wen, J. Song and L.-Z. Gong, Kinetic Resolution of Aziridines Enabled by *N*-Heterocyclic Carbene/Copper Cooperative Catalysis: Carbene Dose-Controlled Chemo-Switchability, *Angew. Chem. Int. Ed.*, 2021, **60**, 3268-3276.
- (6) S. E. Kazzouli, J. Koubachi, S. Berteina-Raboin, A. Mouaddib and G. Guillaumet, A Mild and Selective Method for the *N*-Boc Deprotection by Sodium Carbonate, *Tetrahedron Lett.*, 2006, **47**, 8575-8577.
- (7) X. Song, Q. Zhou, J. Zhao, Y. Jiang, X. Zhang, X. Zhang and X. Fan, Synthesis of 1,3-Benzodiazepines through [5 + 2] Annulation of *N*-Aryl Amidines with Propargylic Esters, *Org. Lett.*, 2020, **22**, 9506-9512.
